# Supplementary material for: Hypervalent iodine(iii) induced oxidative olefination of benzylamines using Wittig reagents
Source: Royal Society of Chemistry journal article supplement (doi:10.1039/d1nj01170g), 2021-01-01
Supplement: d1nj01170g1.pdf [file d1nj01170g1.pdf]

## **Electronic Supplementary Information (ESI)**

### **Hypervalent Iodine (III) Induced Oxidative Olefination of Benzyl Amines using Wittig Reagents**

R. Vijayalakshmi, <sup>[abc]</sup> Bapurao D. Rupanawar, <sup>[abc]</sup> Satish G. More, <sup>[ab]</sup> Ajay H. Bansode, <sup>[ab]</sup> and Gurunath Suryavanshi\*<sup>[ab]</sup>

<sup>[a]</sup>Chemical Engineering & Process Development Division, CSIR-National Chemical Laboratory, Dr. Homi Bhabha Road, Pashan, Pune- 411008, Maharashtra, India.

Tel: +912025902547, Fax: +912025902676,

E-mail: [gm.suryavanshi@ncl.res.in](mailto:gm.suryavanshi@ncl.res.in).

<sup>[b]</sup>Academy of Scientific and Innovative Research (AcSIR), Ghaziabad, 201002, India

#### **Table of Contents**

| <b>Sr. No.</b> | <b>Description</b>                              | <b>Page No.</b> |
|----------------|-------------------------------------------------|-----------------|
| 1.             | <sup>1</sup> H and <sup>13</sup> C NMR Spectra  | S2-S41          |
| 2.             | <sup>31</sup> P NMR Spectra of Reaction Mixture | S42             |

# <sup>1</sup>H and <sup>13</sup>C-NMR Spectra's

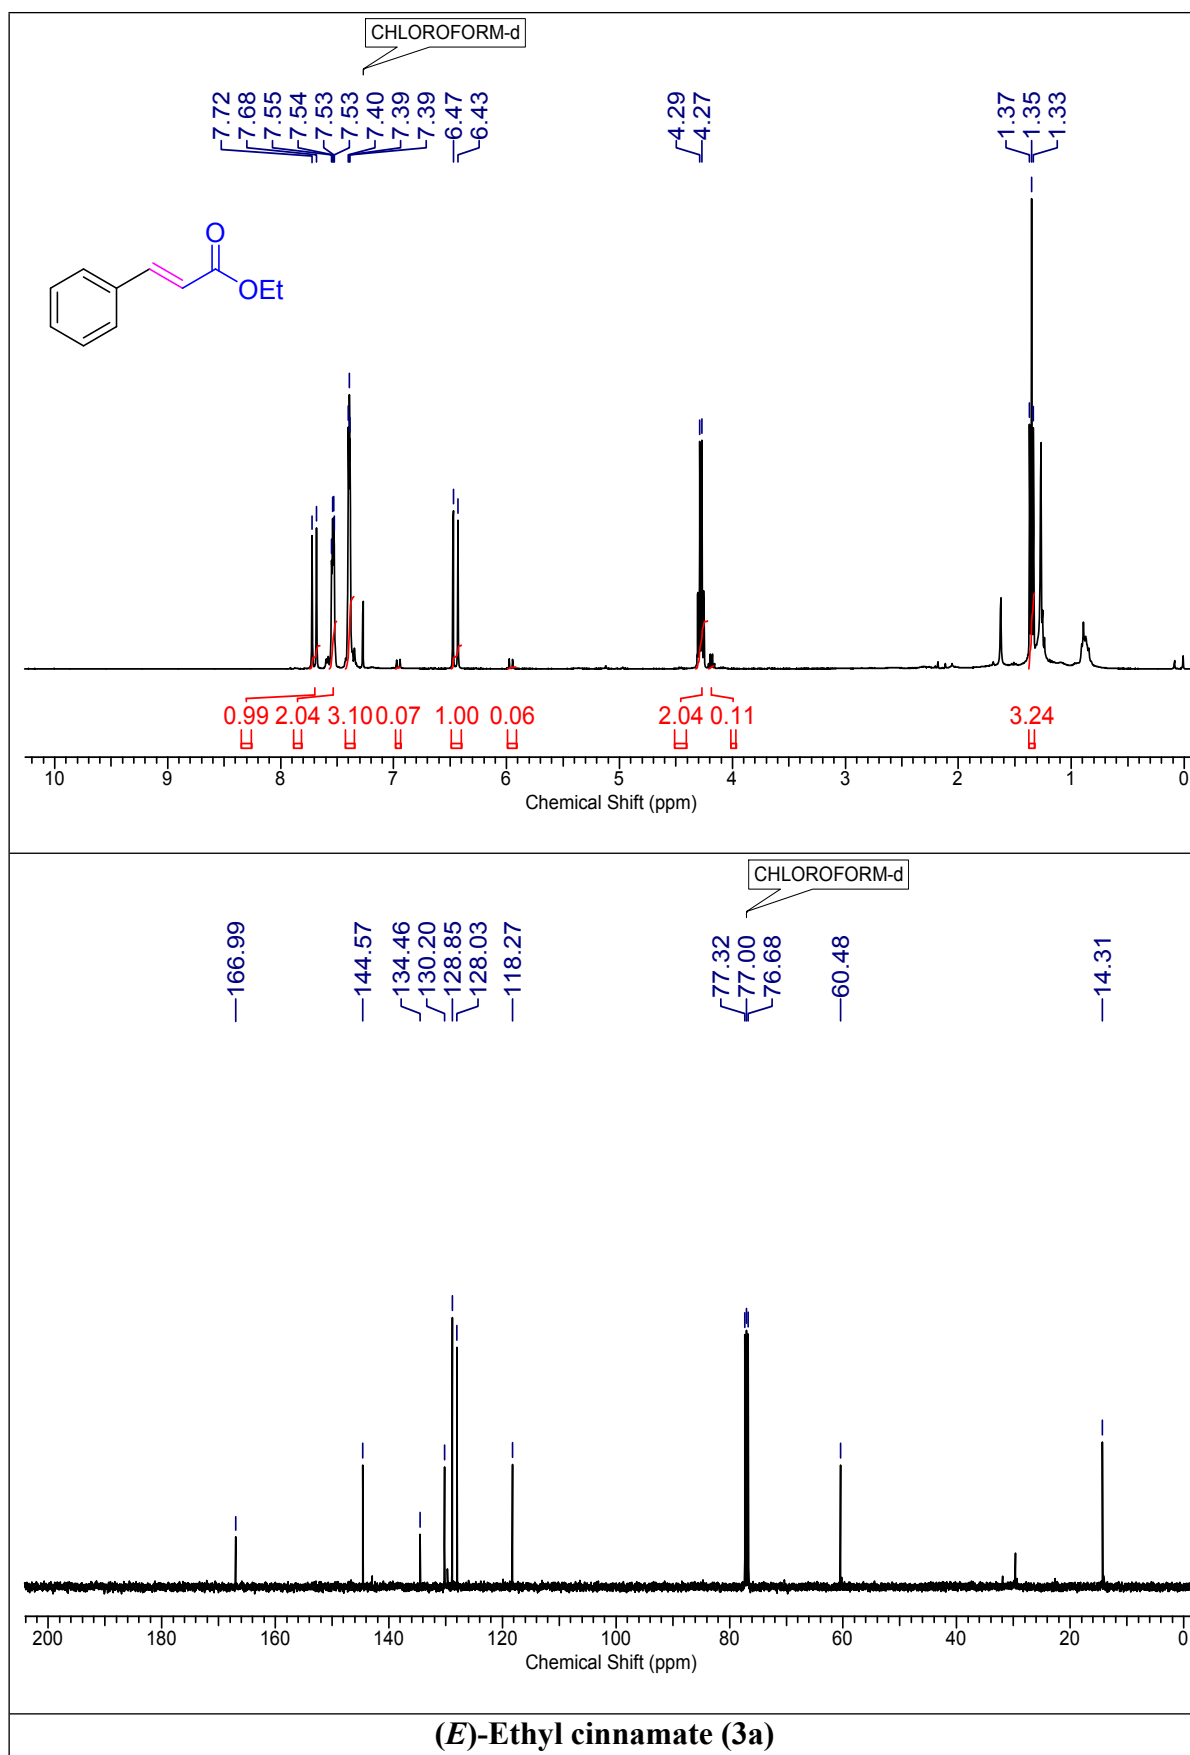

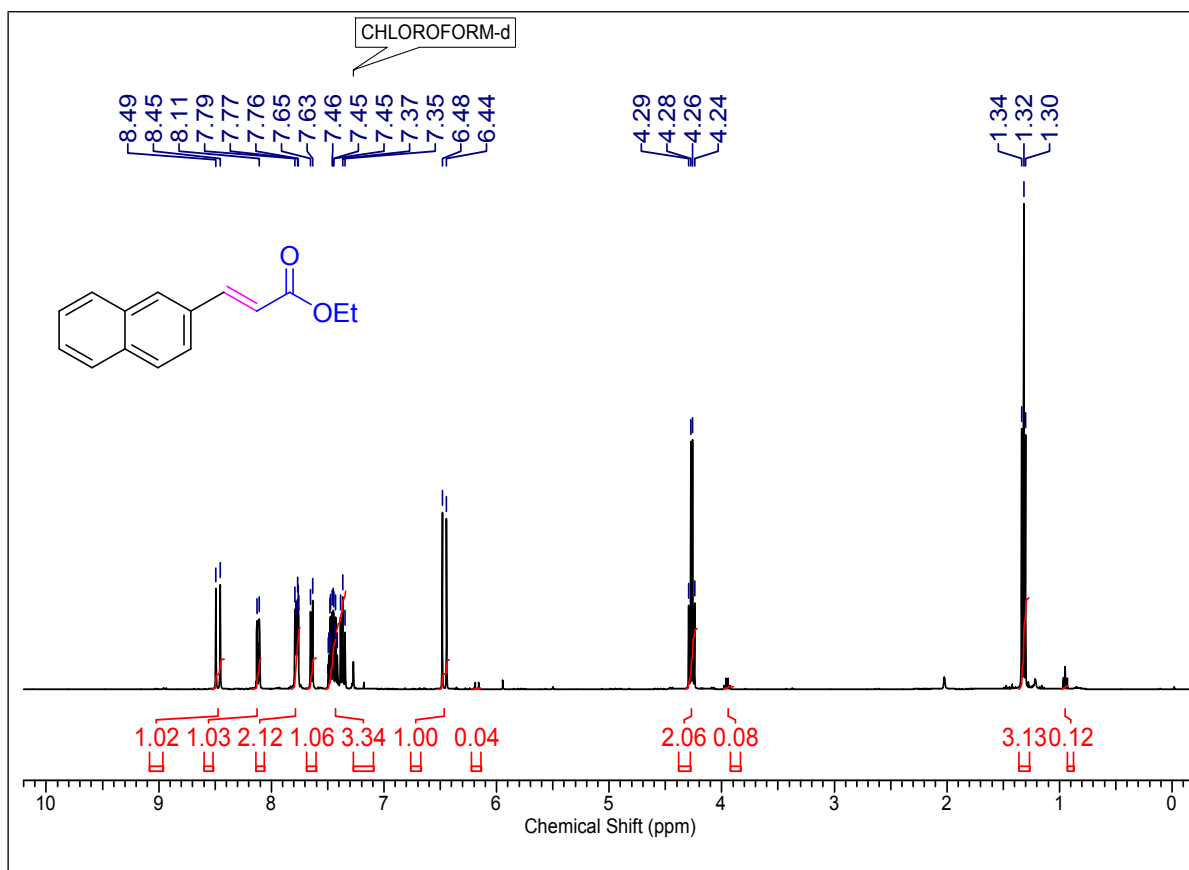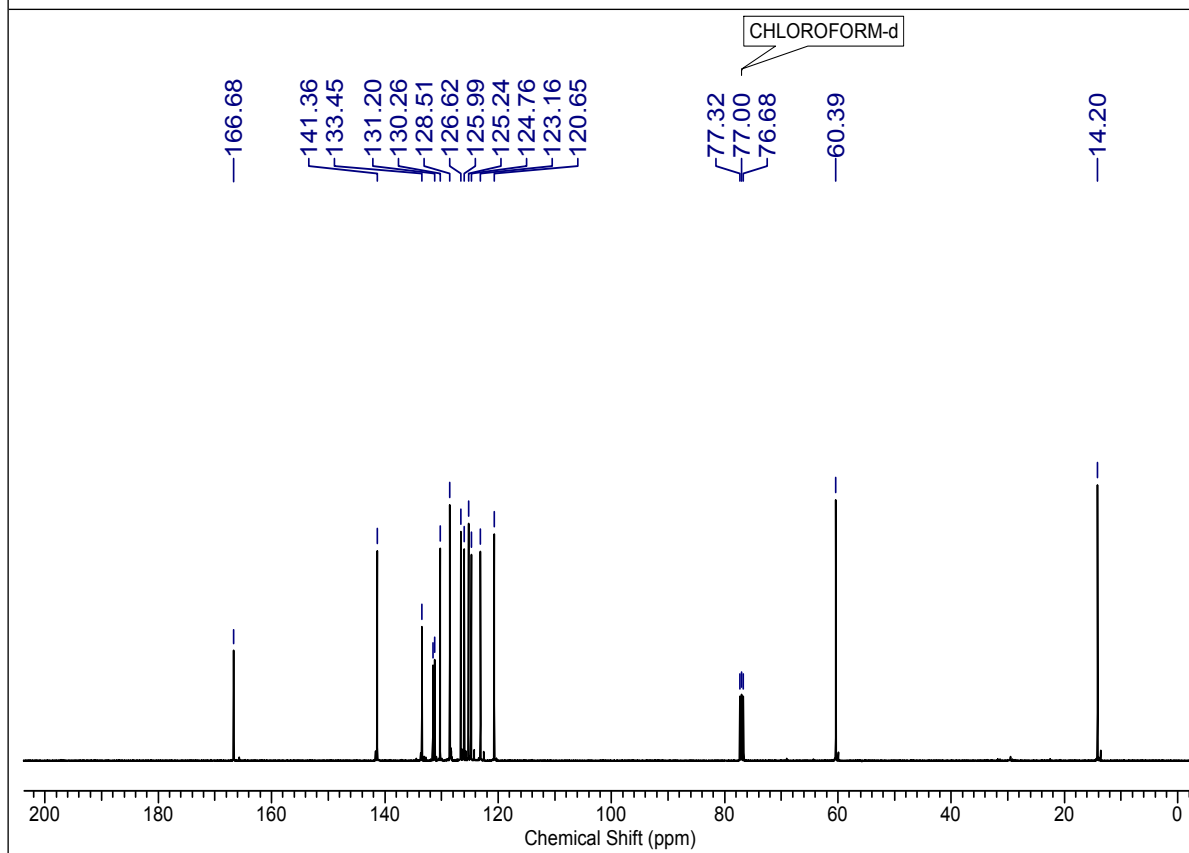

**Ethyl (*E*)-3-(naphthalen-2-yl) acrylate (3b)**

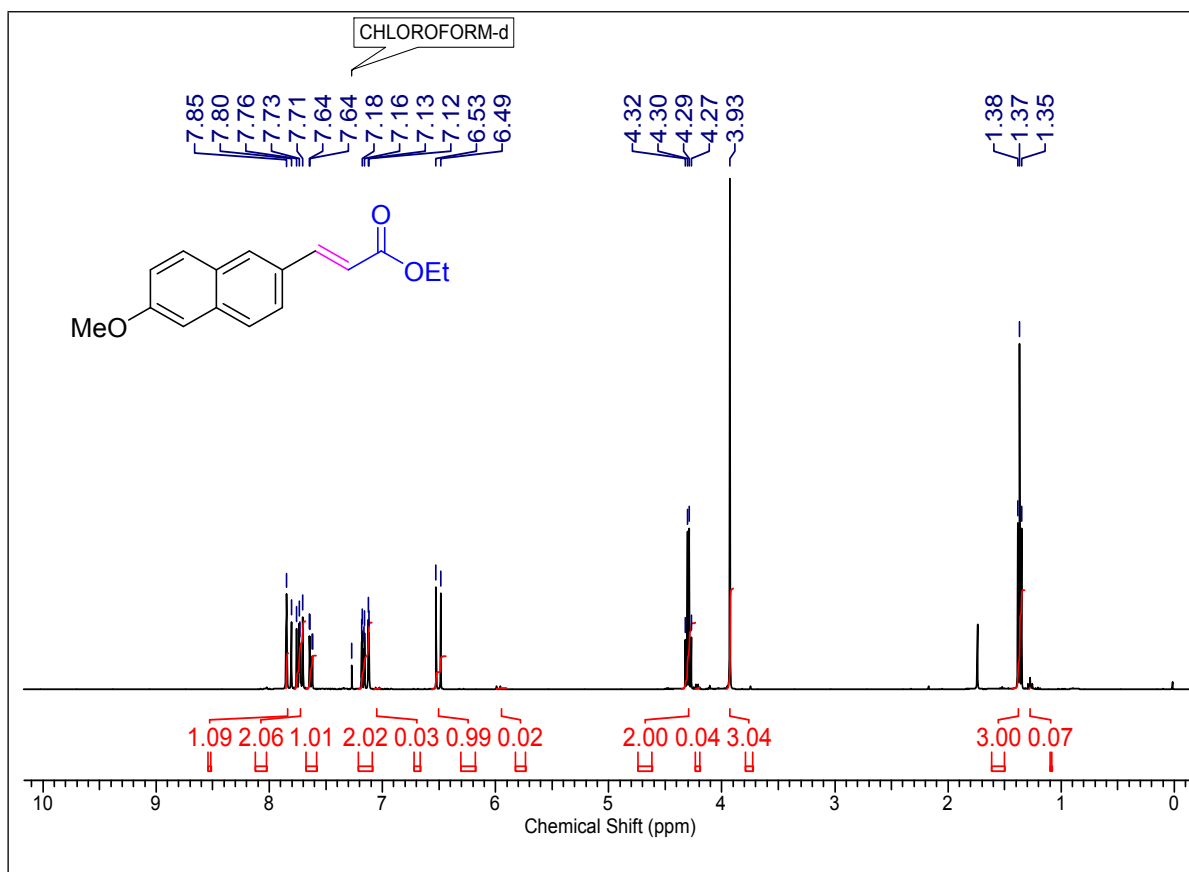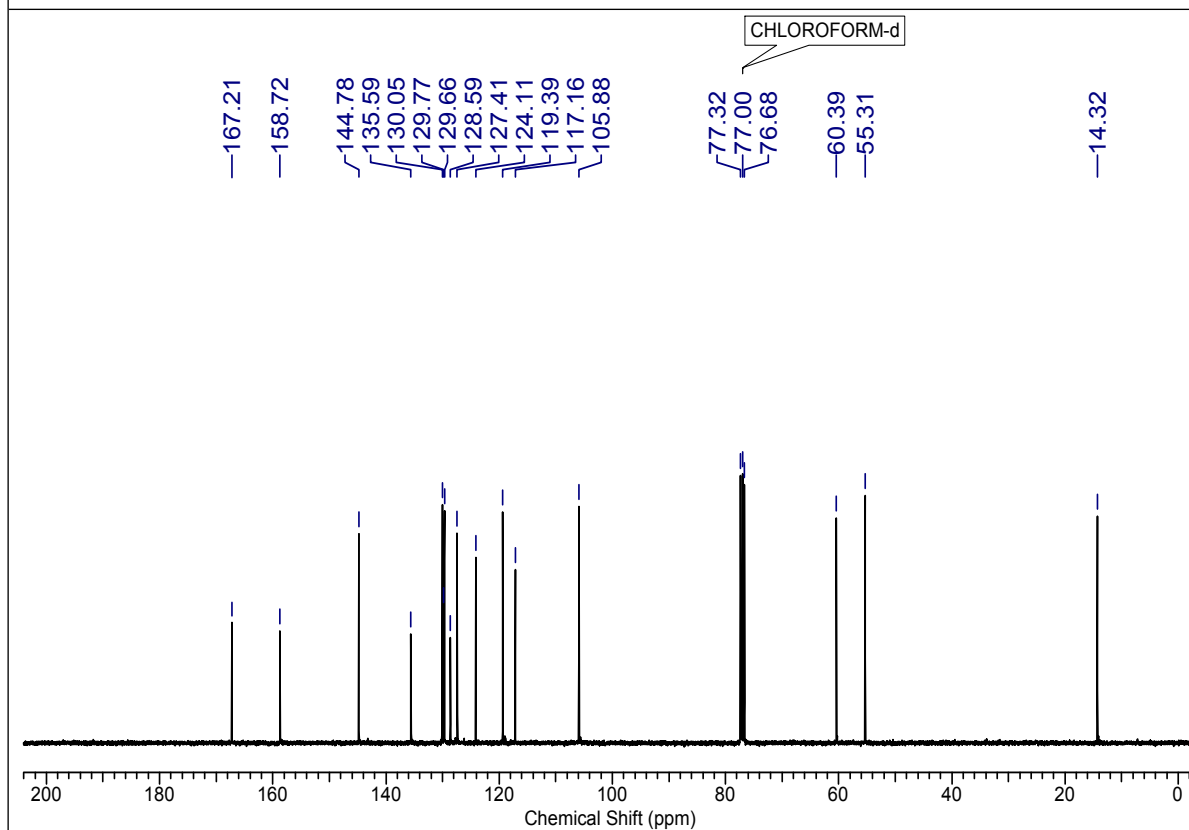

ethyl (*E*)-3-(6-methoxynaphthalen-2-yl) acrylate (3c)

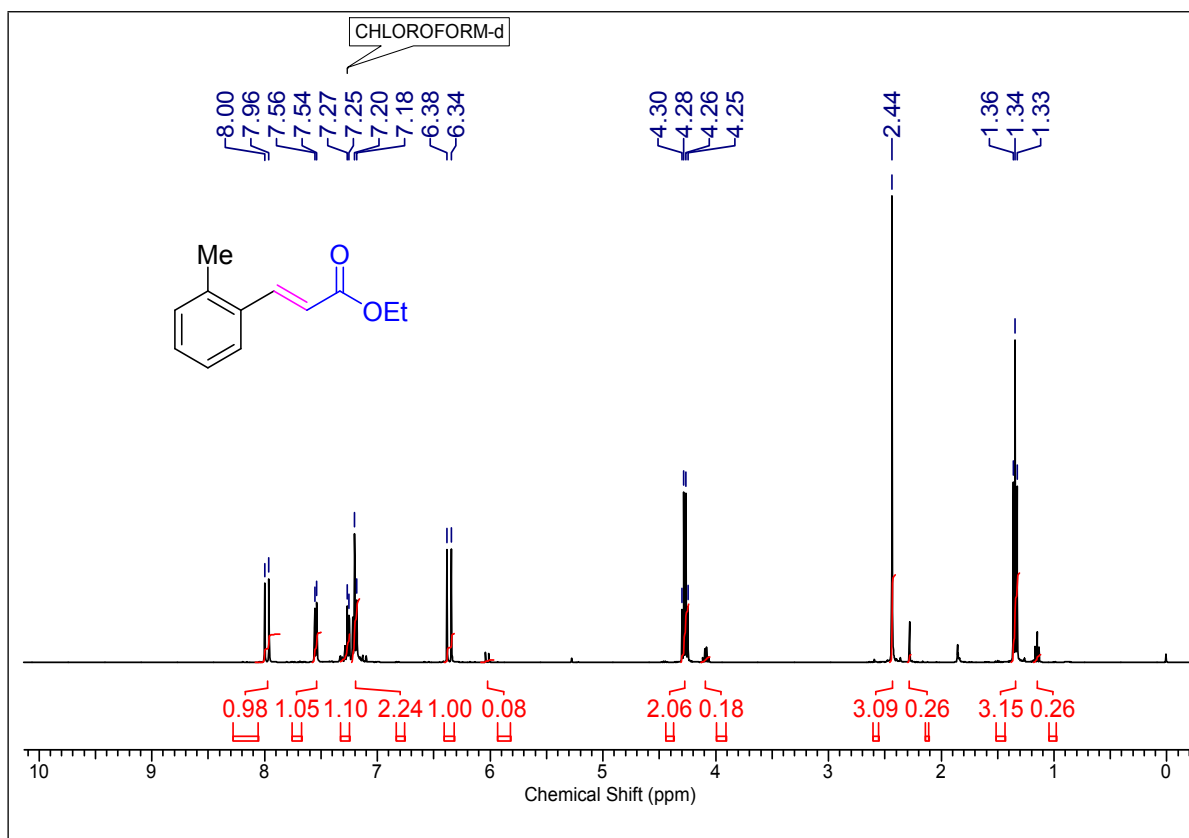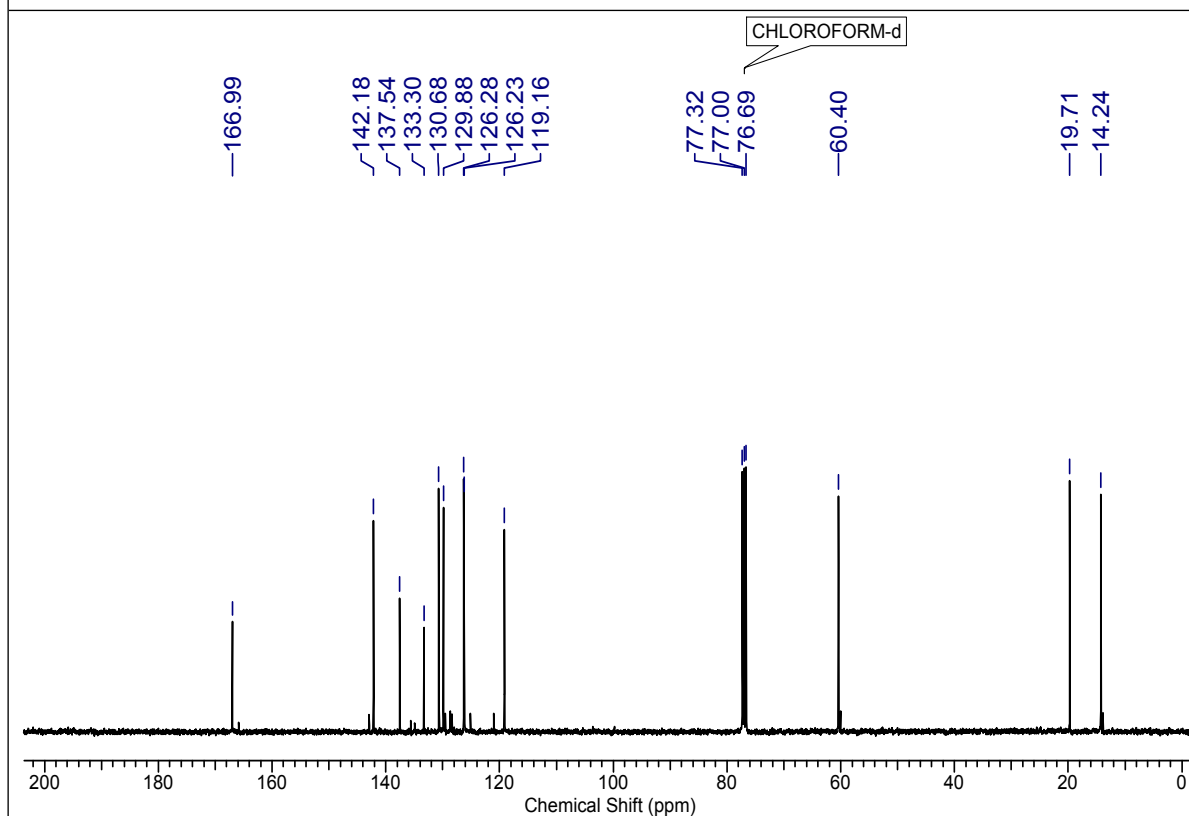

**Ethyl (*E*)-3-(*o*-tolyl)acrylate (3d)**

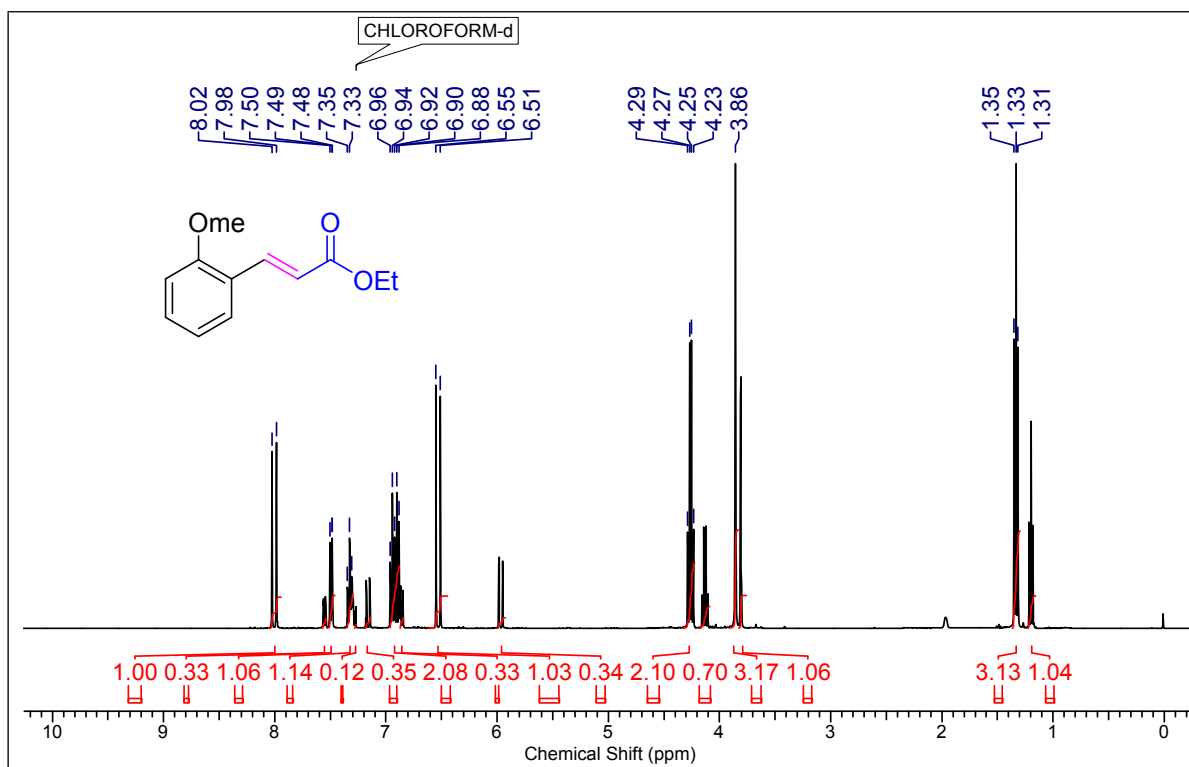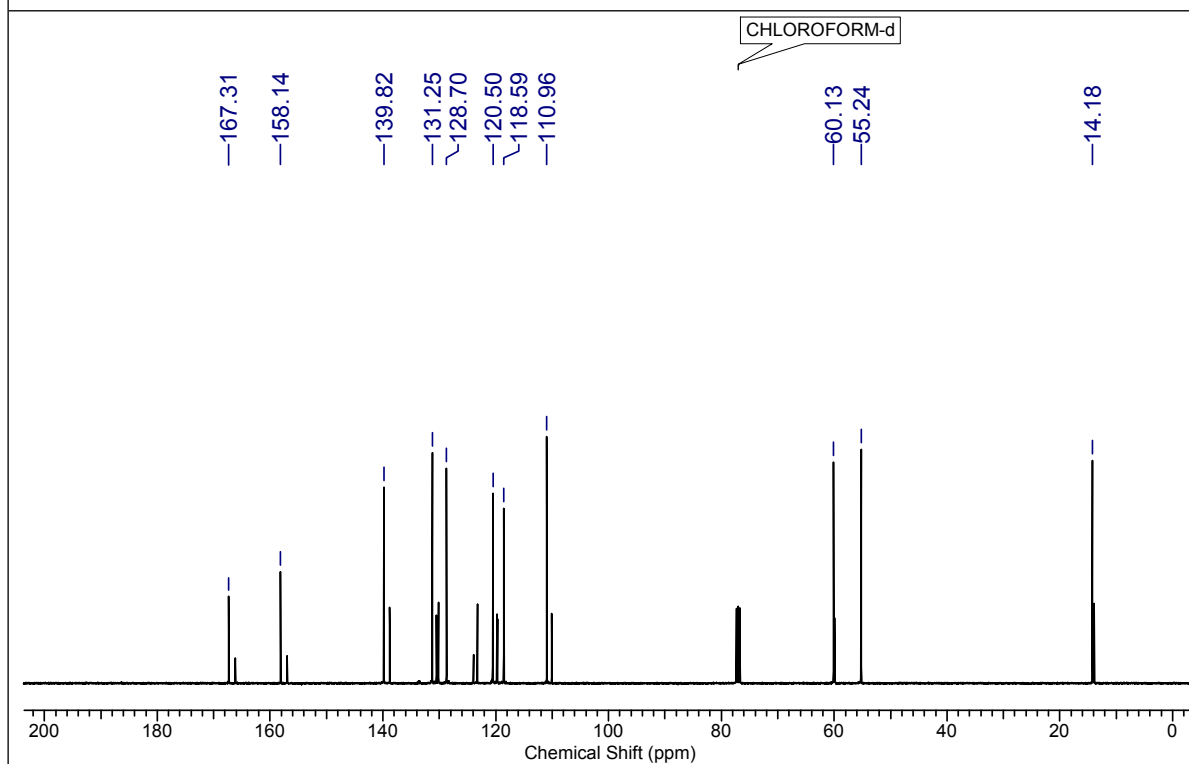

**Ethyl (*E*)-3-(2-methoxyphenyl)acrylate (3e)**

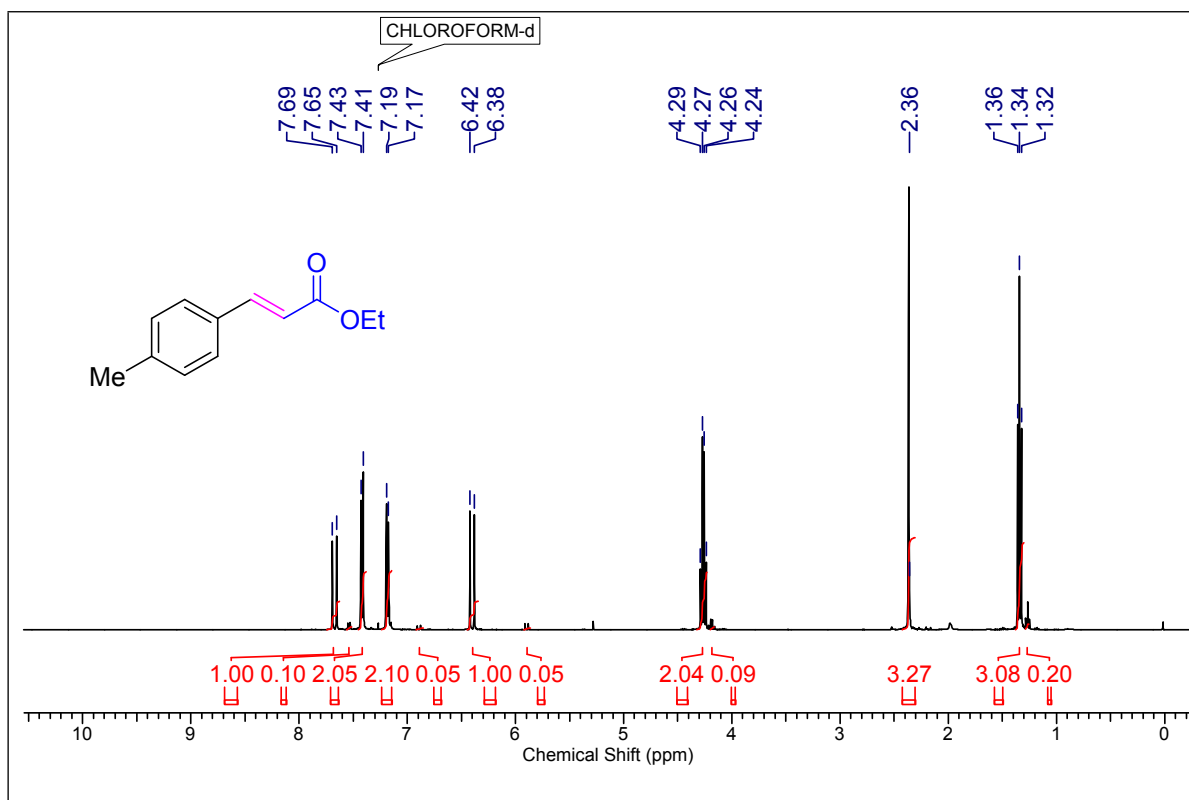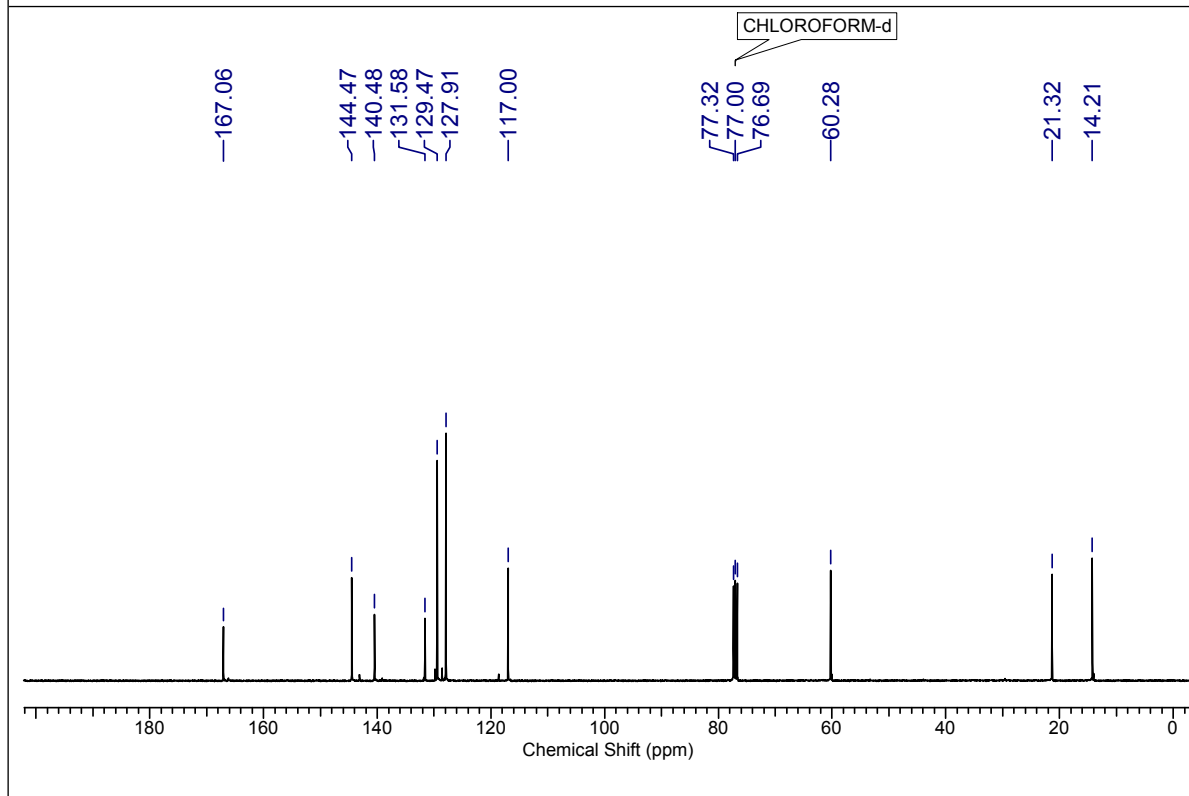

**Ethyl (*E*)-3-(*p*-tolyl)acrylate (3f)**

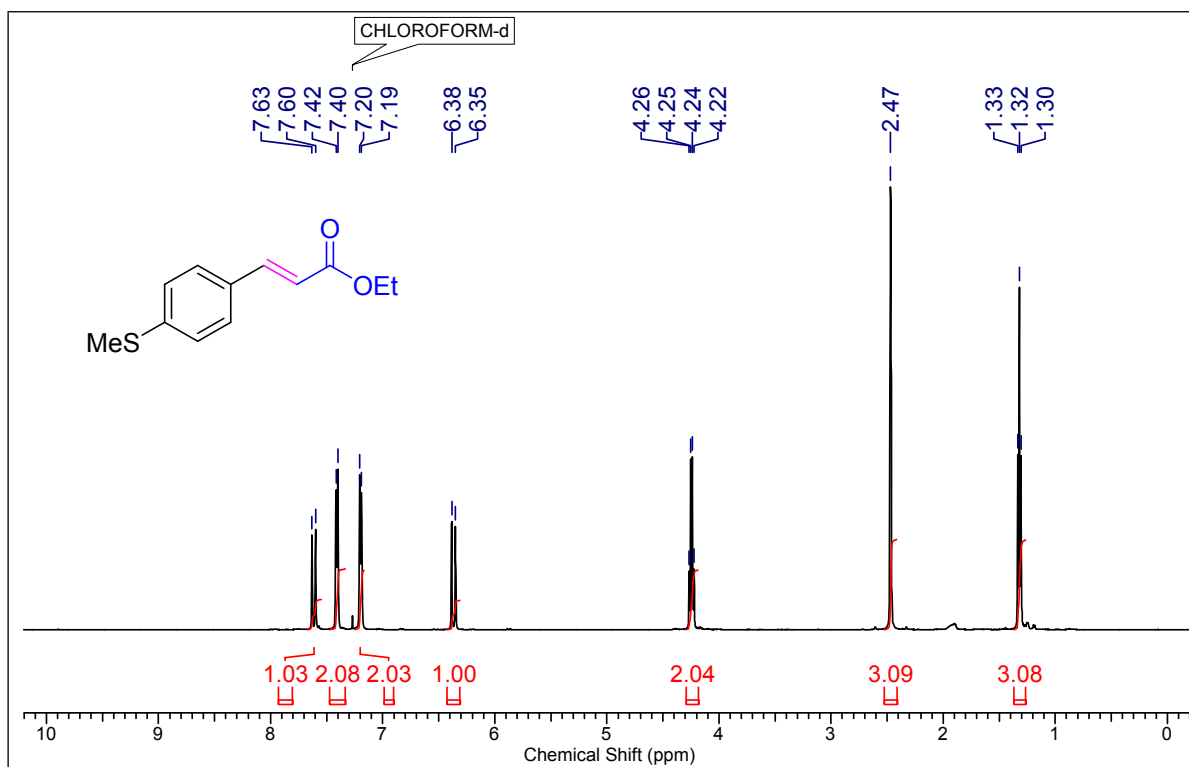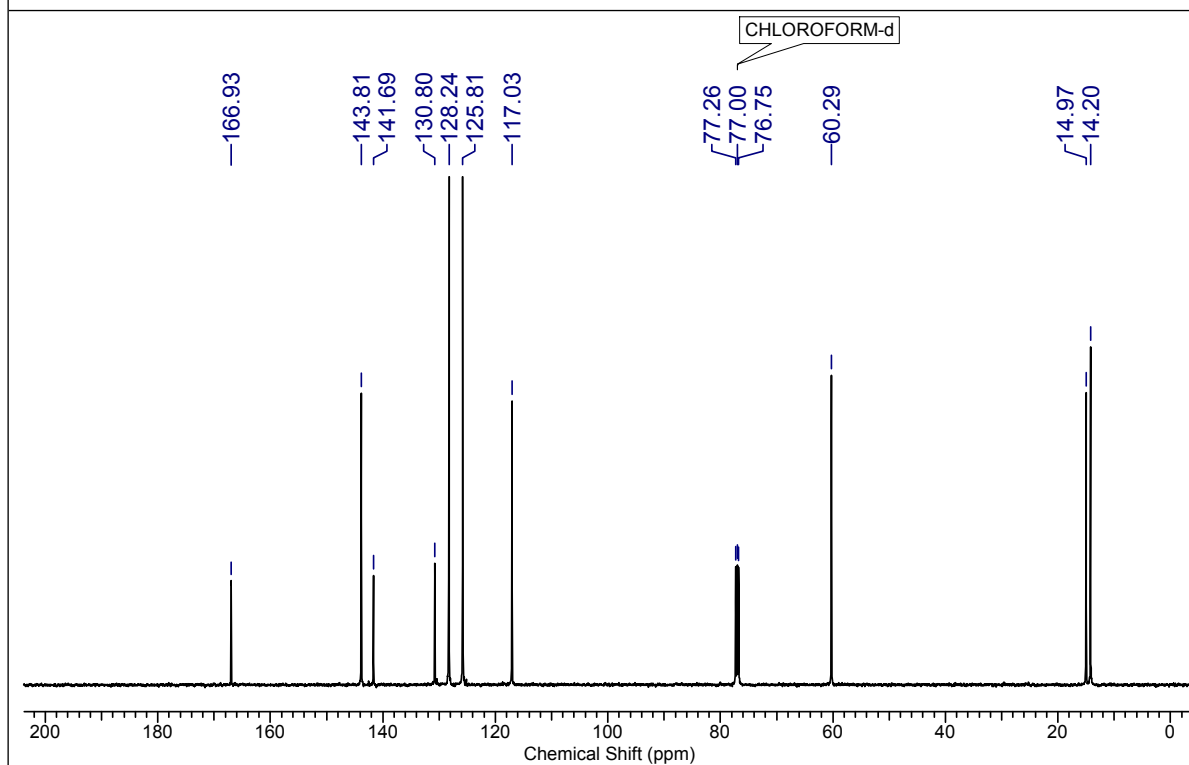

**Ethyl (*E*)-3-(4-(methylthio)phenyl)acrylate (3g)**



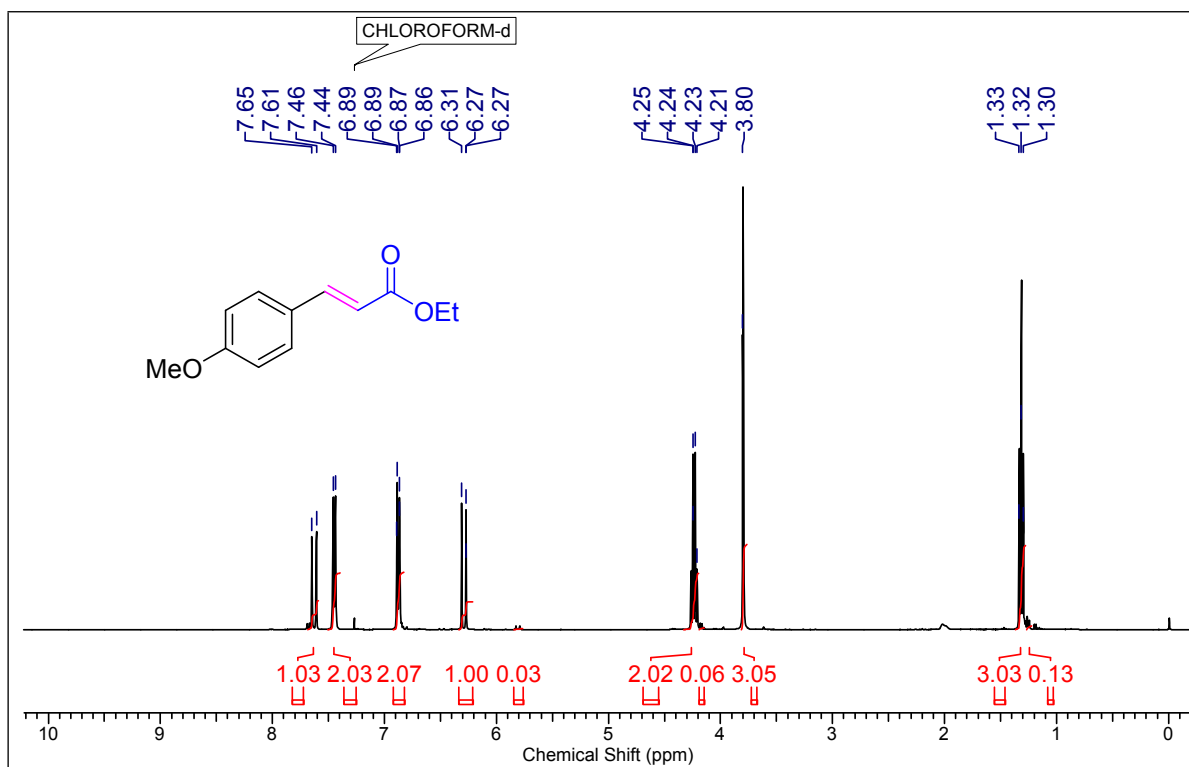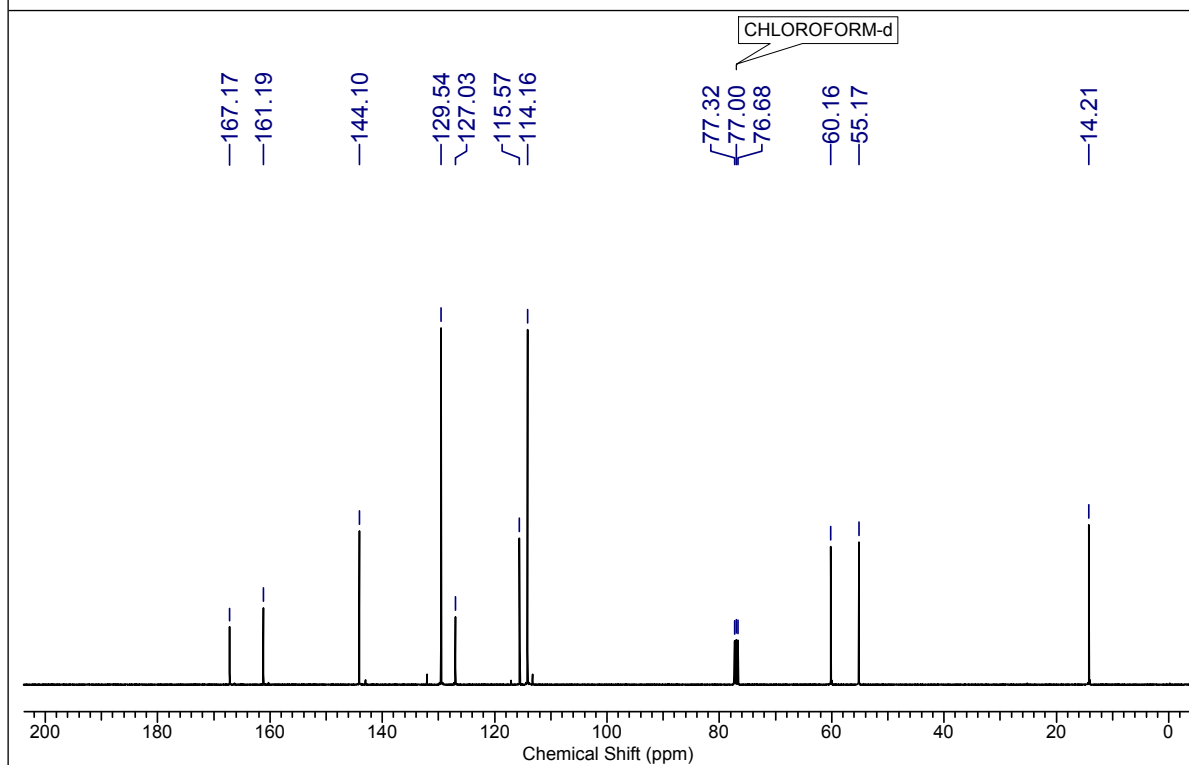

**Ethyl (*E*)-3-(4-methoxyphenyl)acrylate (3h)**

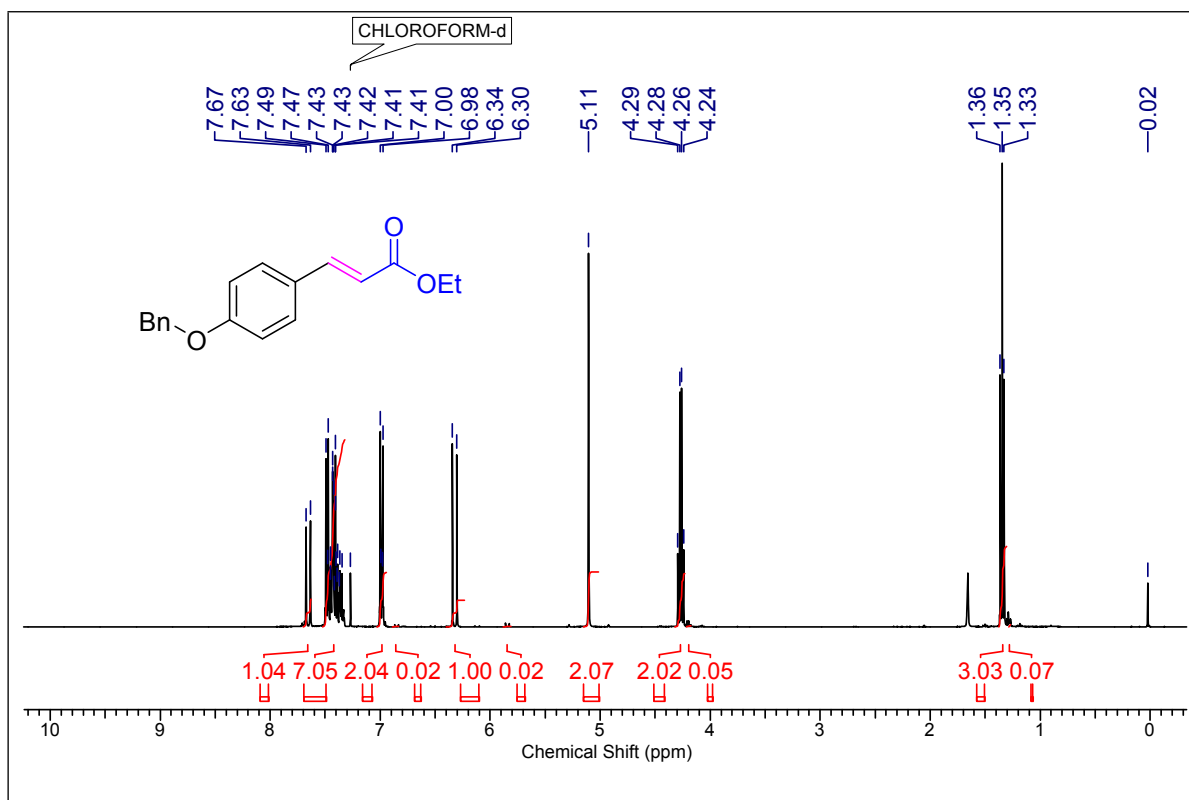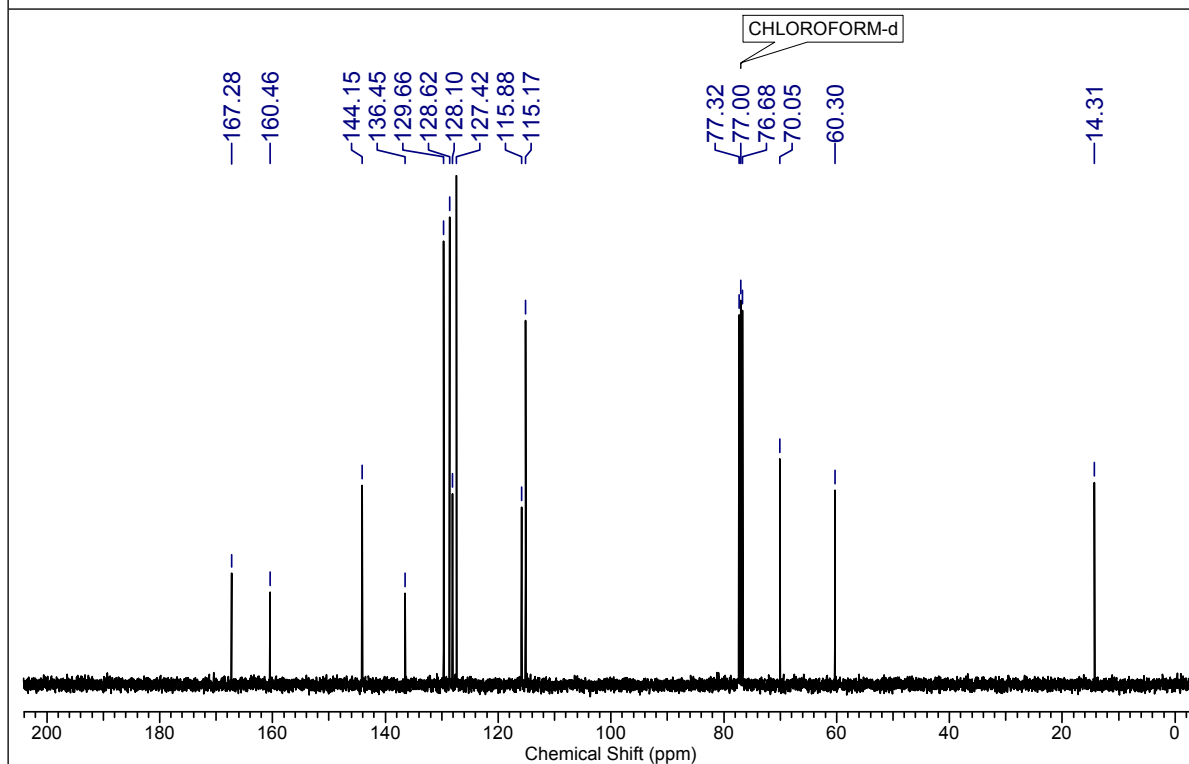

**Ethyl (*E*)-3-(4-(benzyloxy)phenyl)acrylate (3i)**

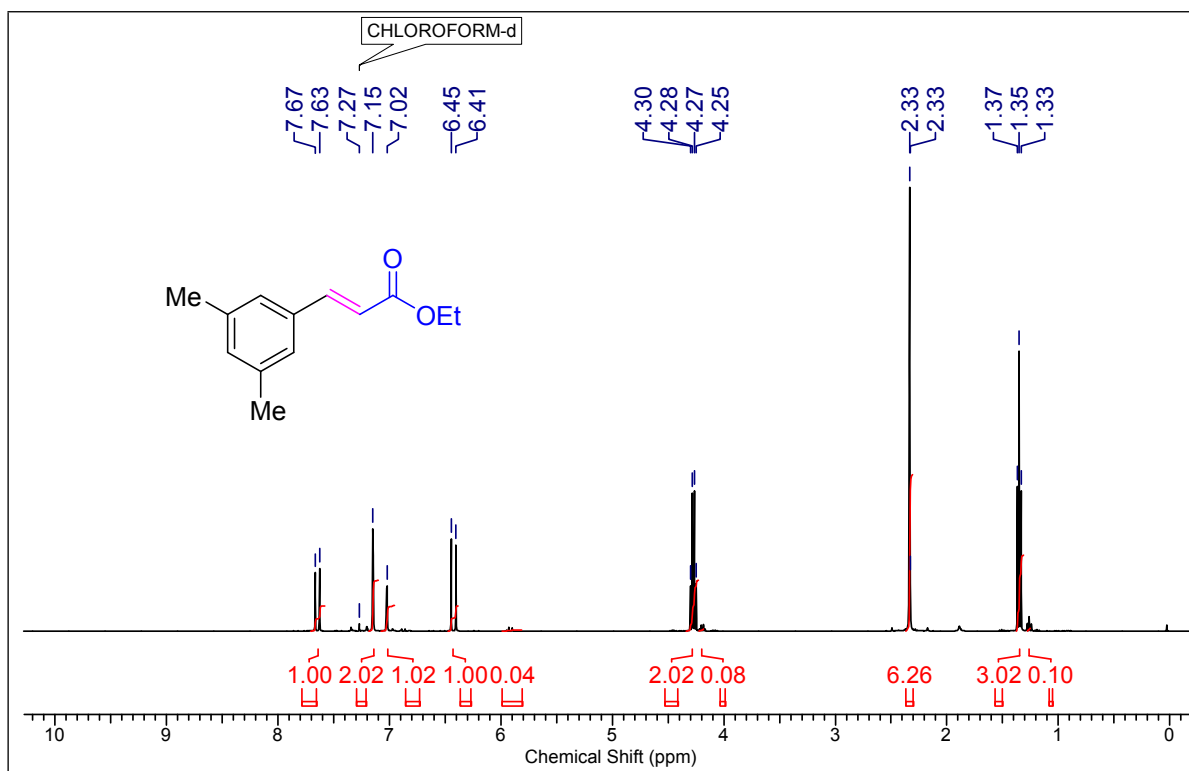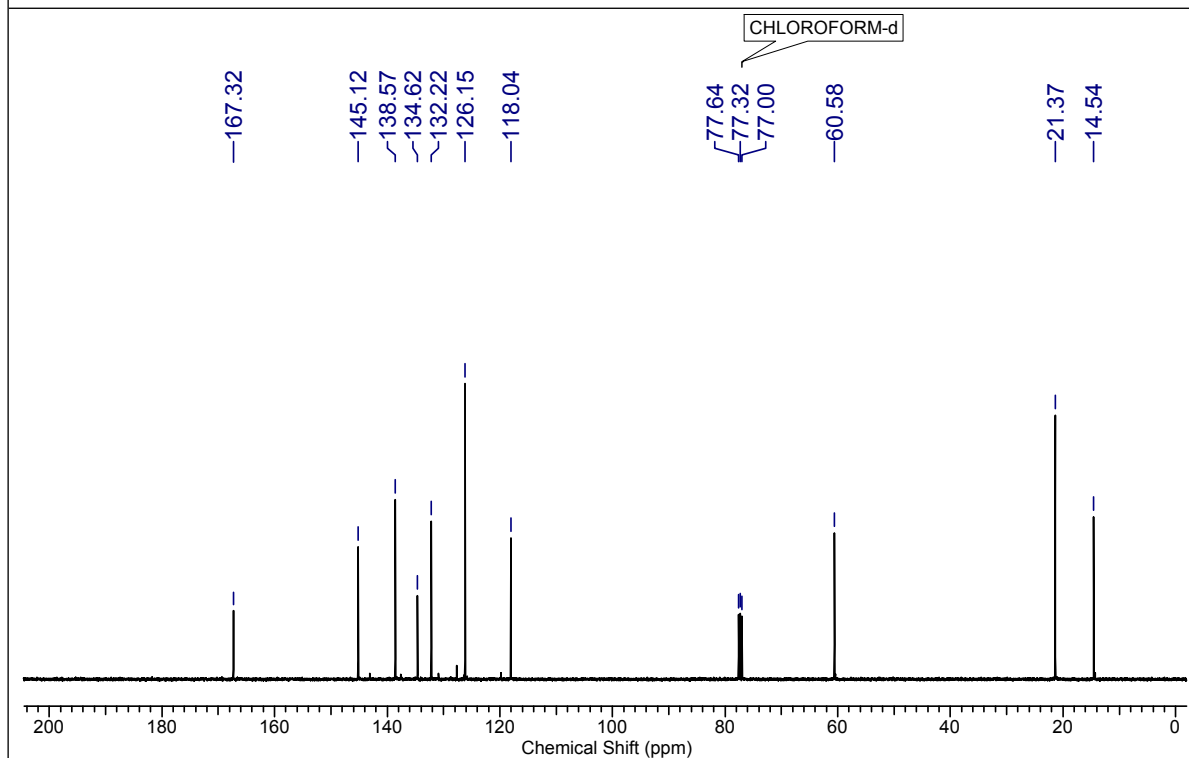

**Ethyl (E)-3-(3,5-dimethylphenyl)acrylate (3j)**

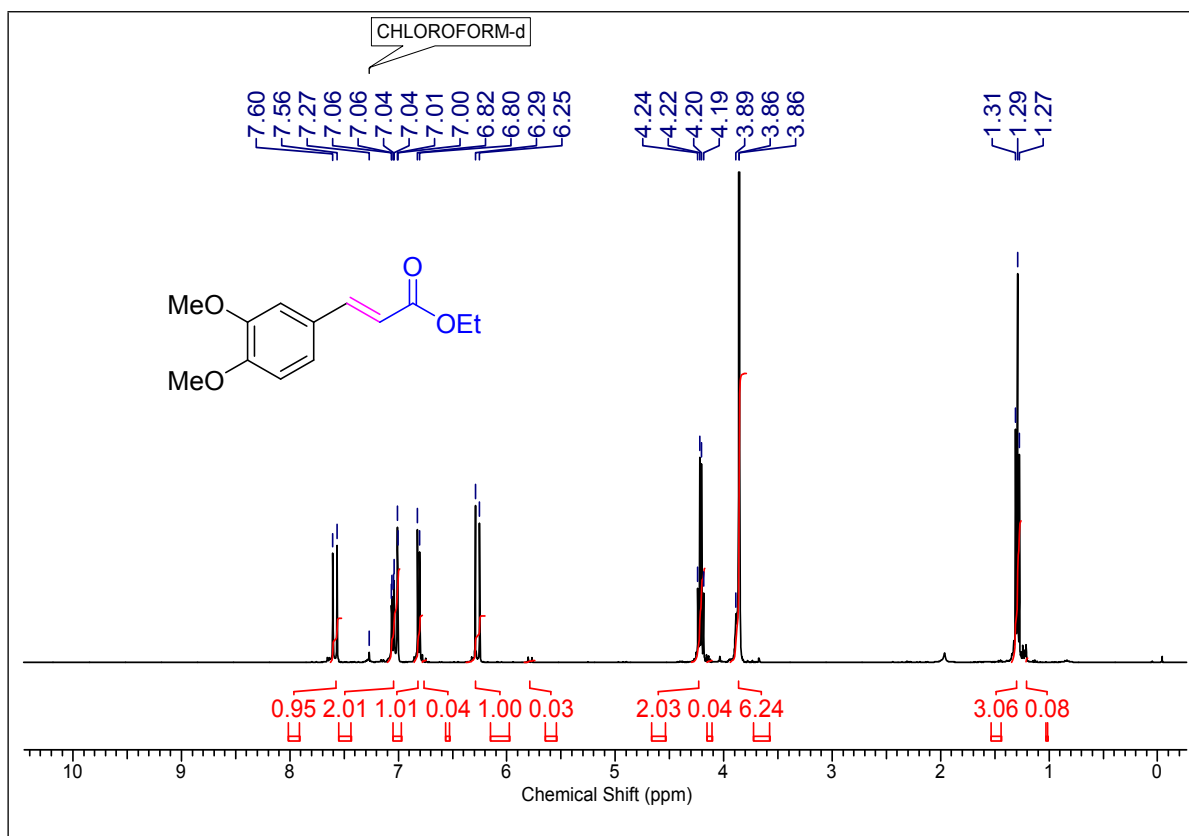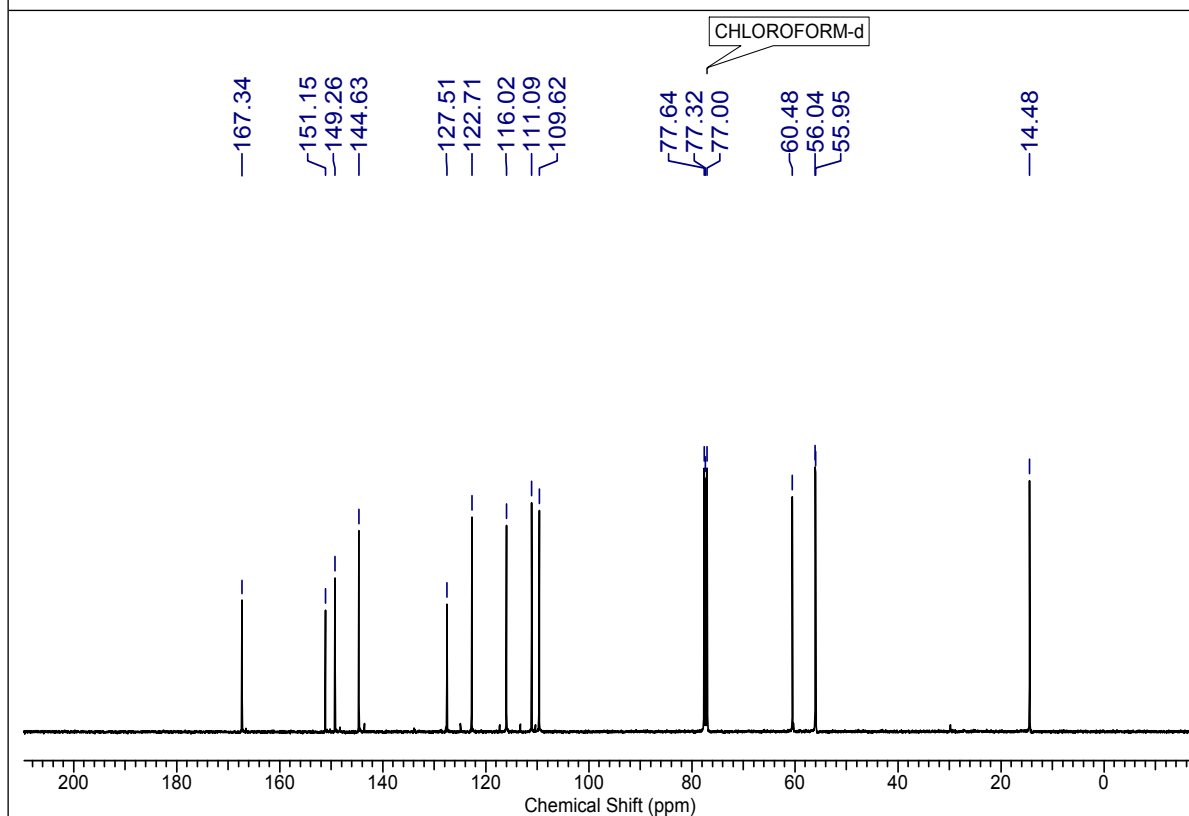

**ethyl (*E*)-3-(3,4-dimethoxyphenyl) acrylate (3k)**

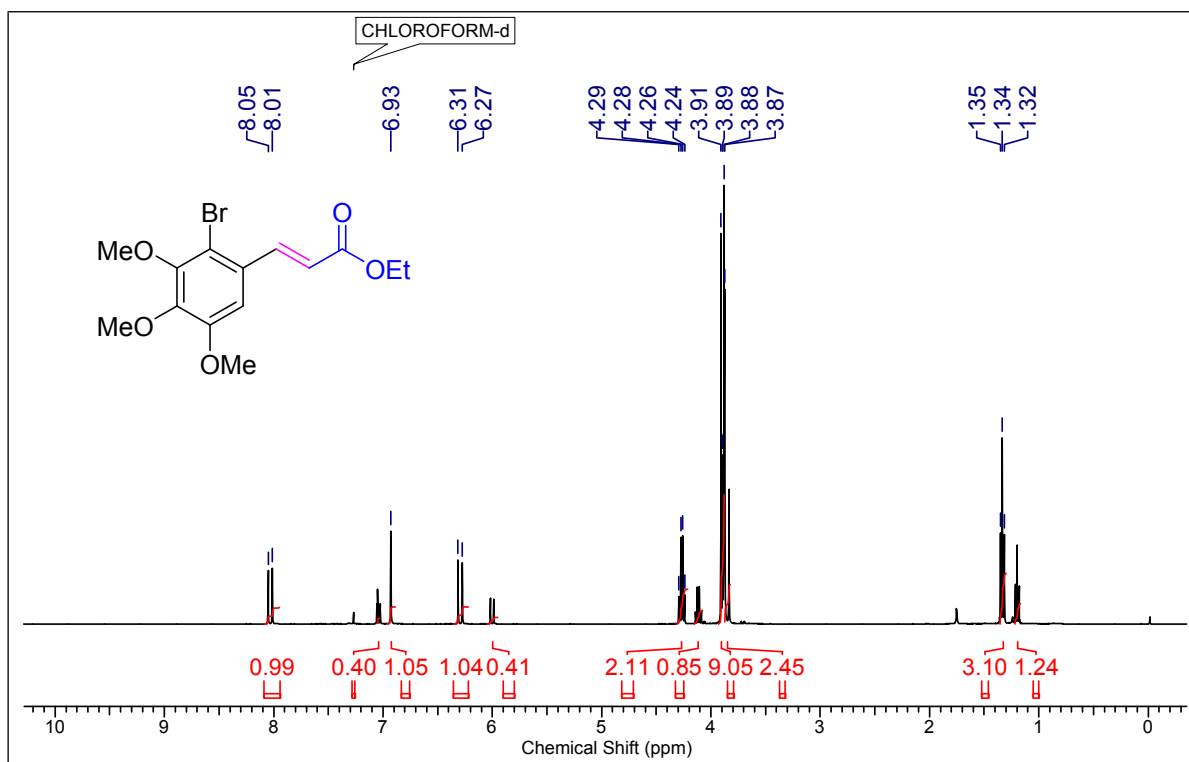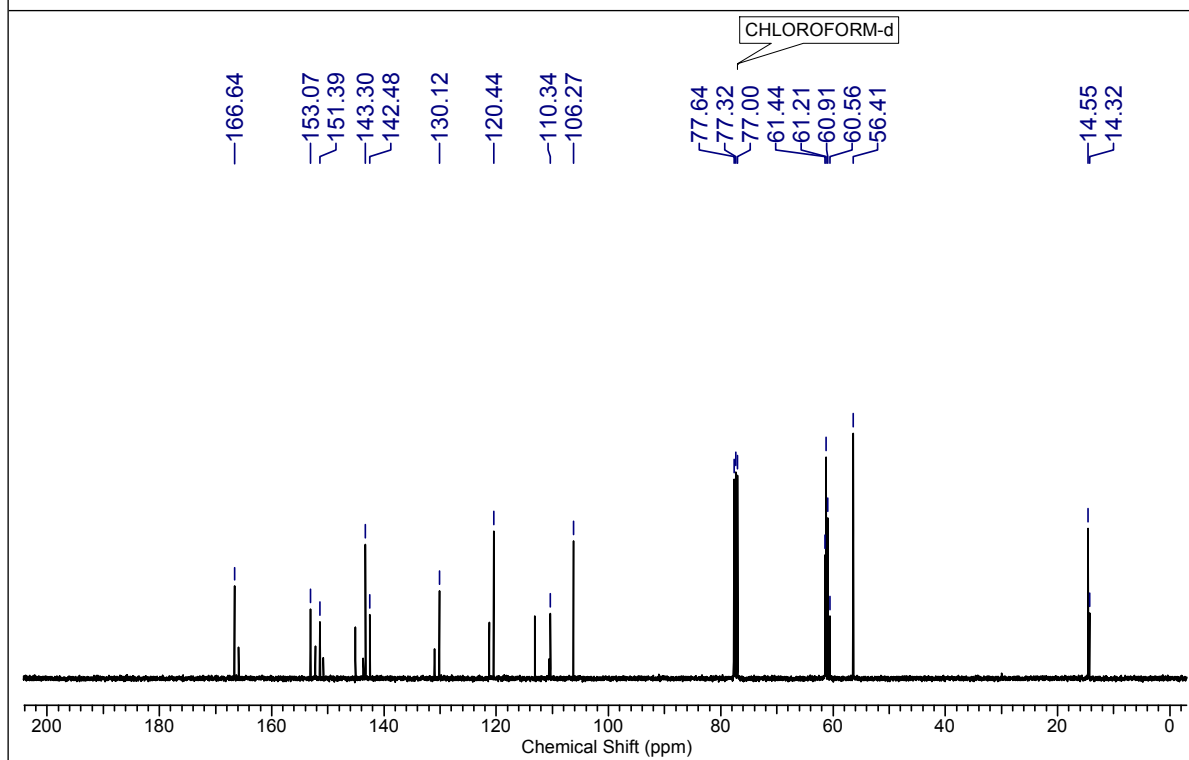

**Ethyl (*E*)-3-(2-bromo-3,4,5-trimethoxyphenyl)acrylate (3l)**

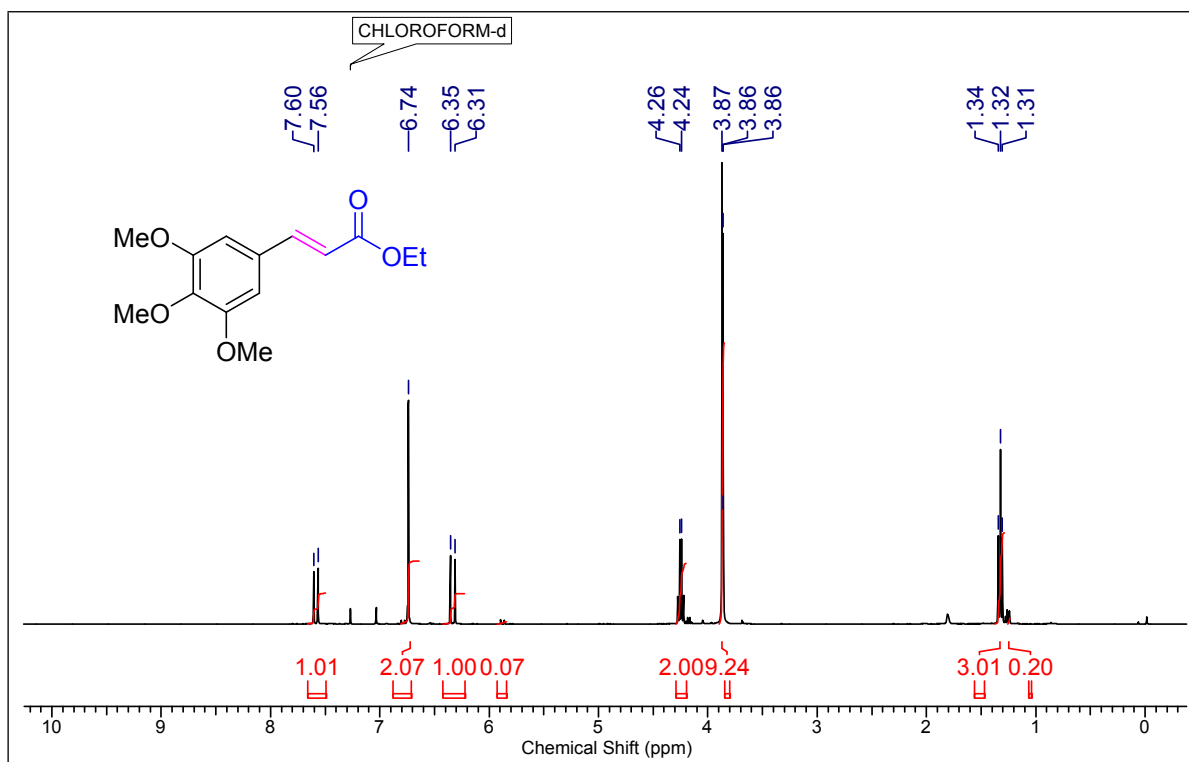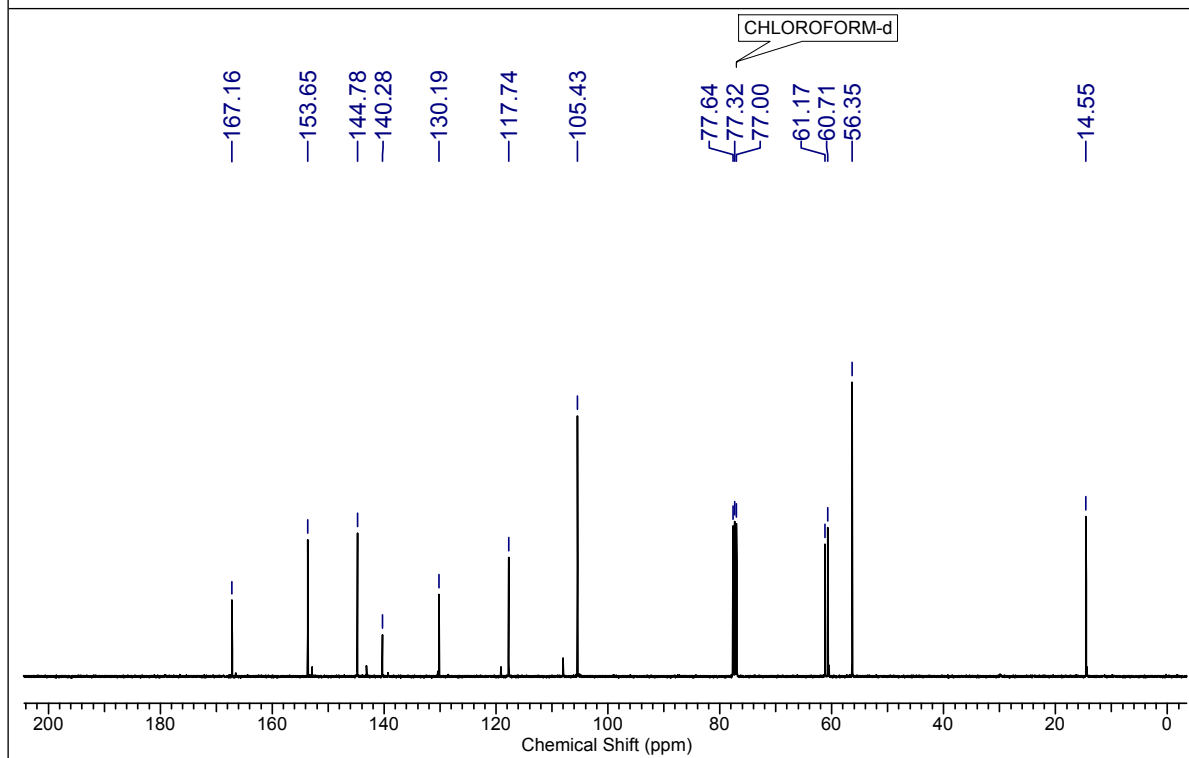

**Ethyl (*E*)-3-(3,4,5-trimethoxyphenyl)acrylate (3m)**

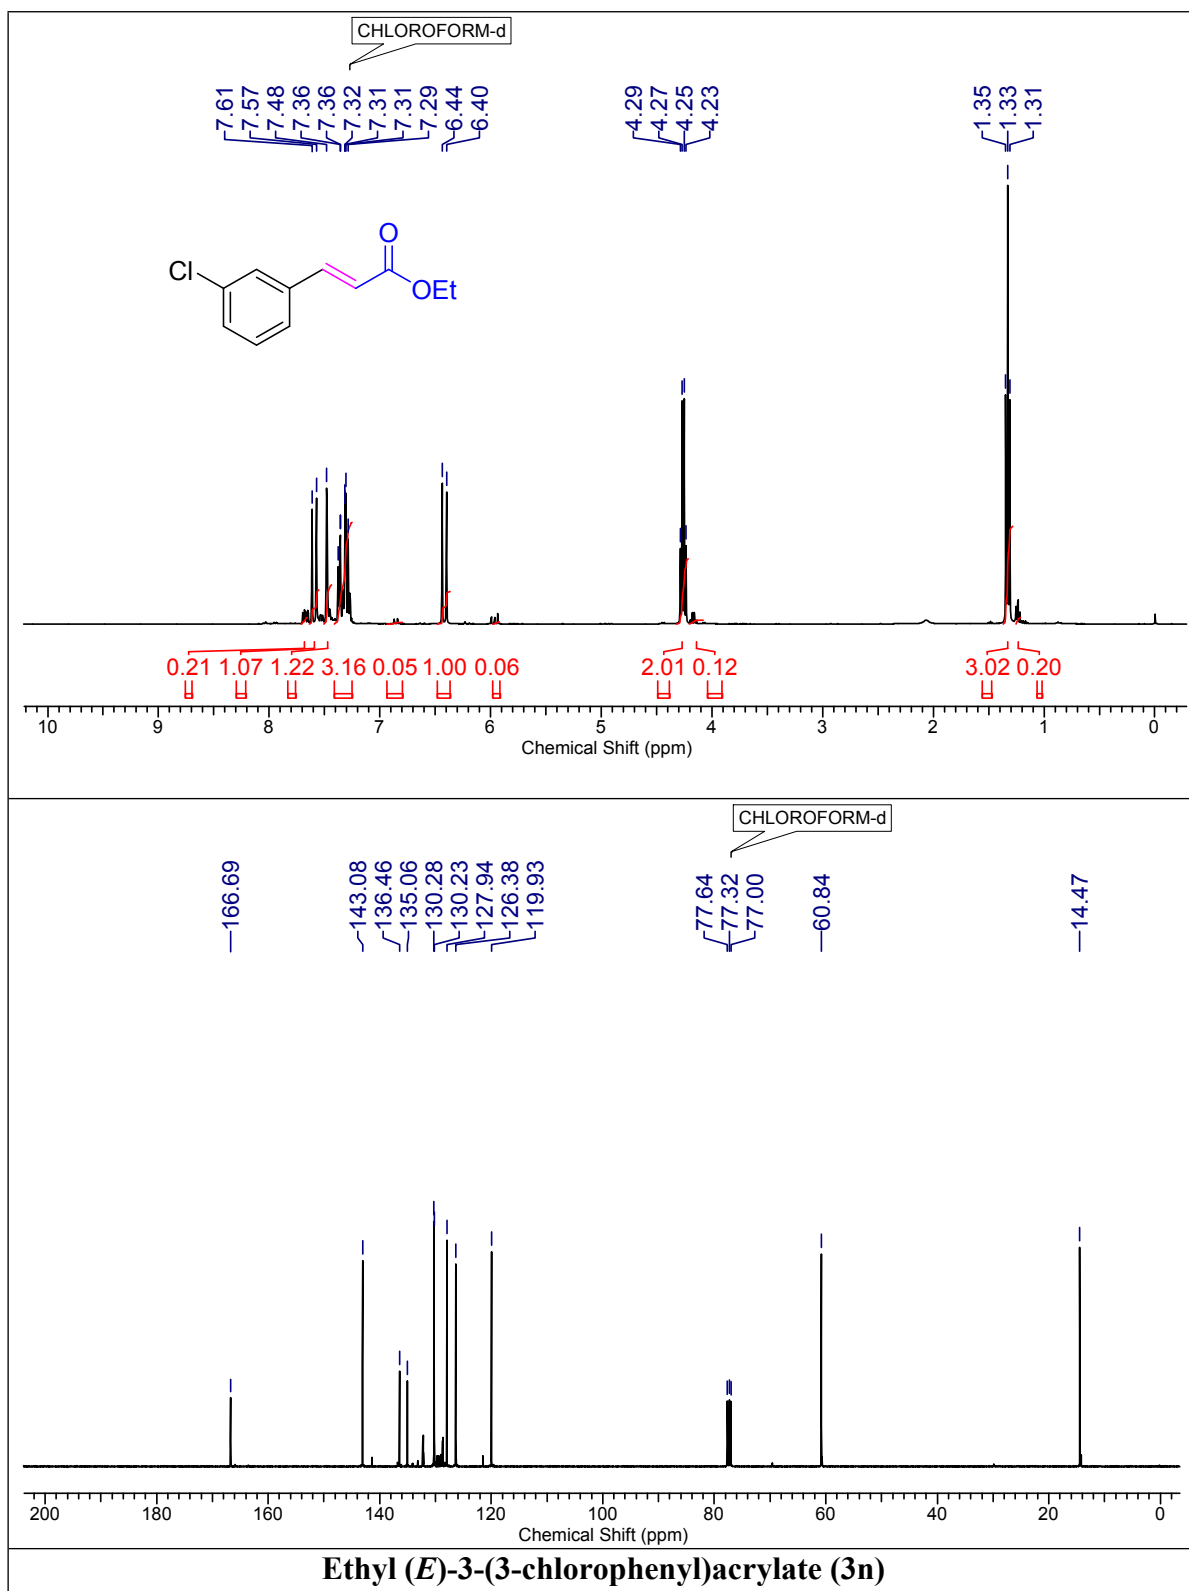

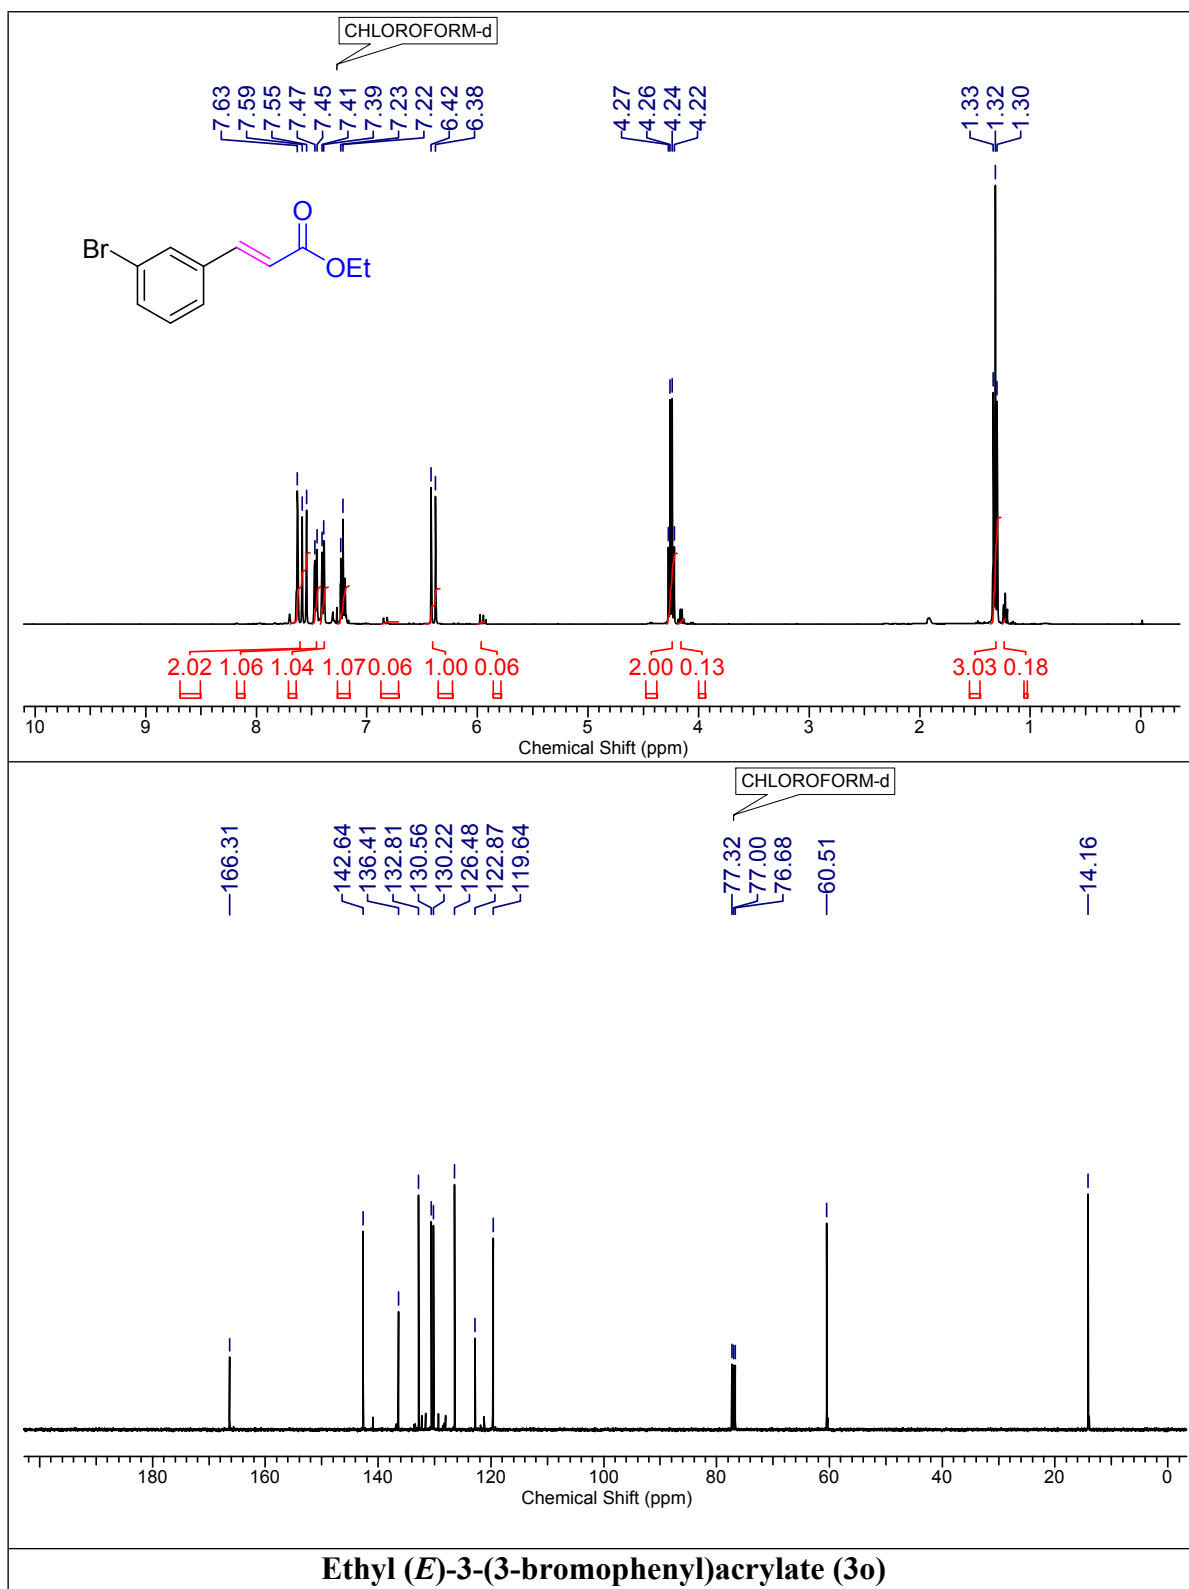



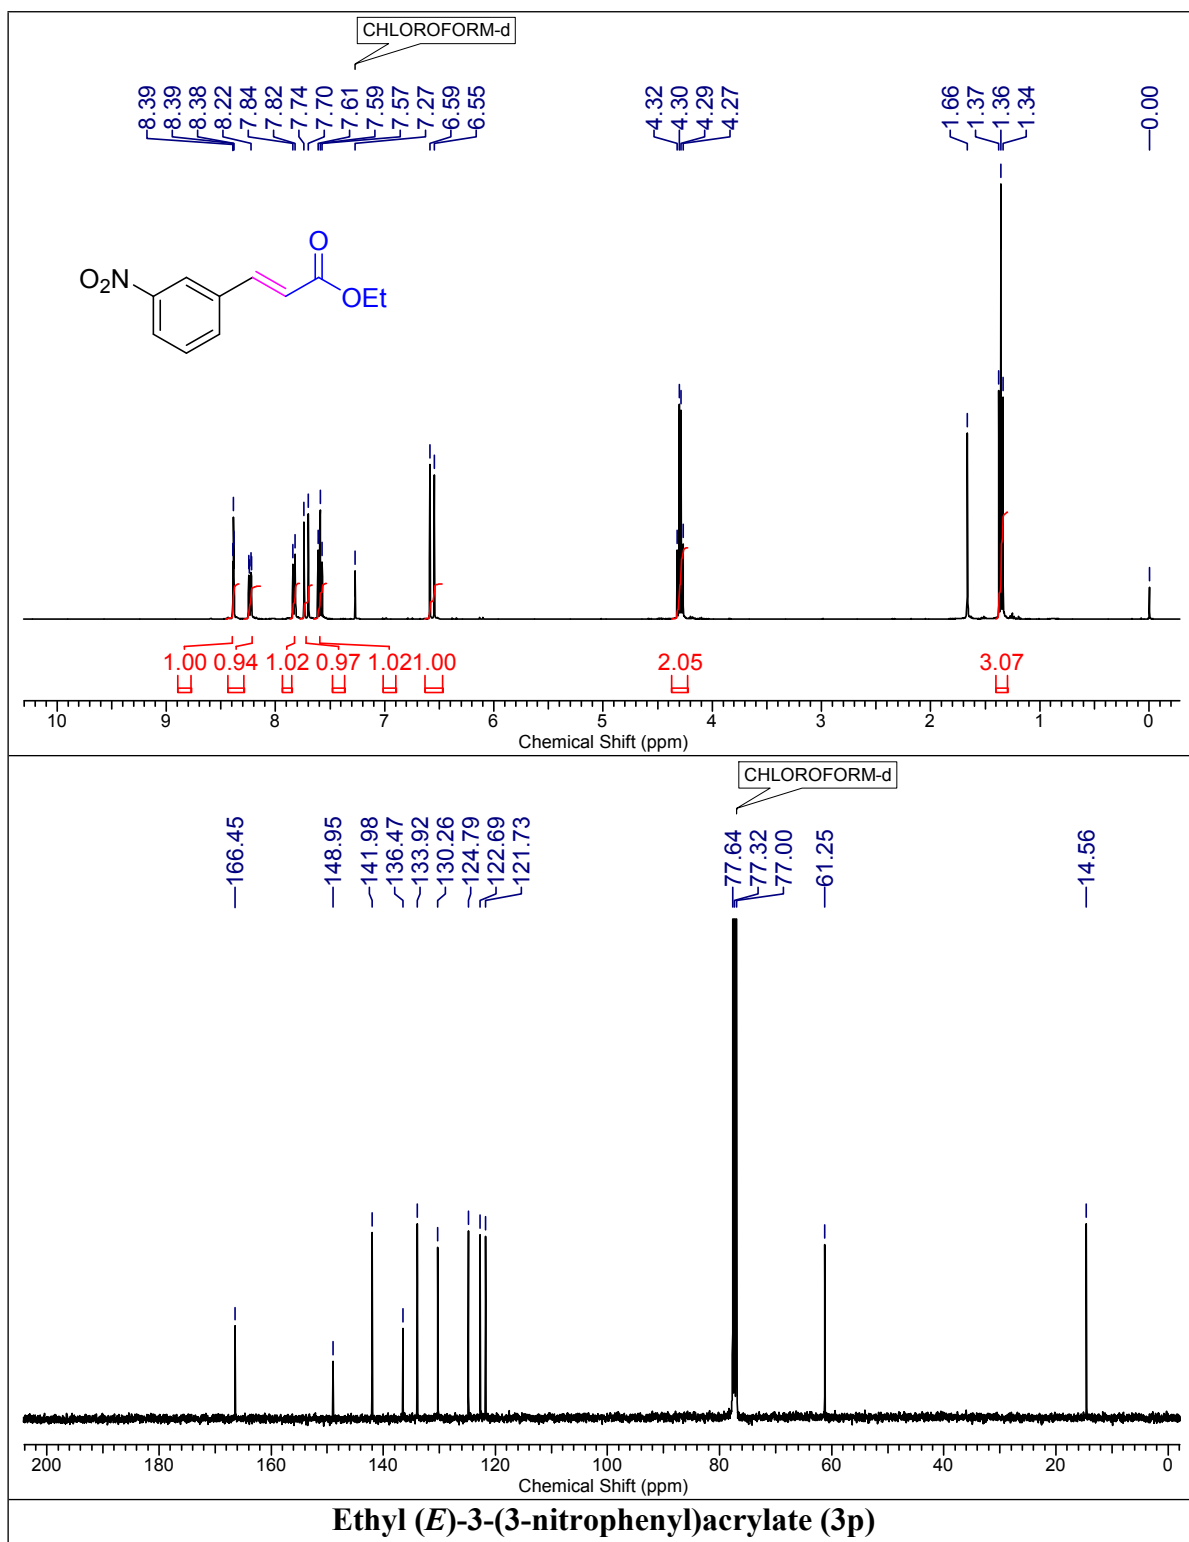

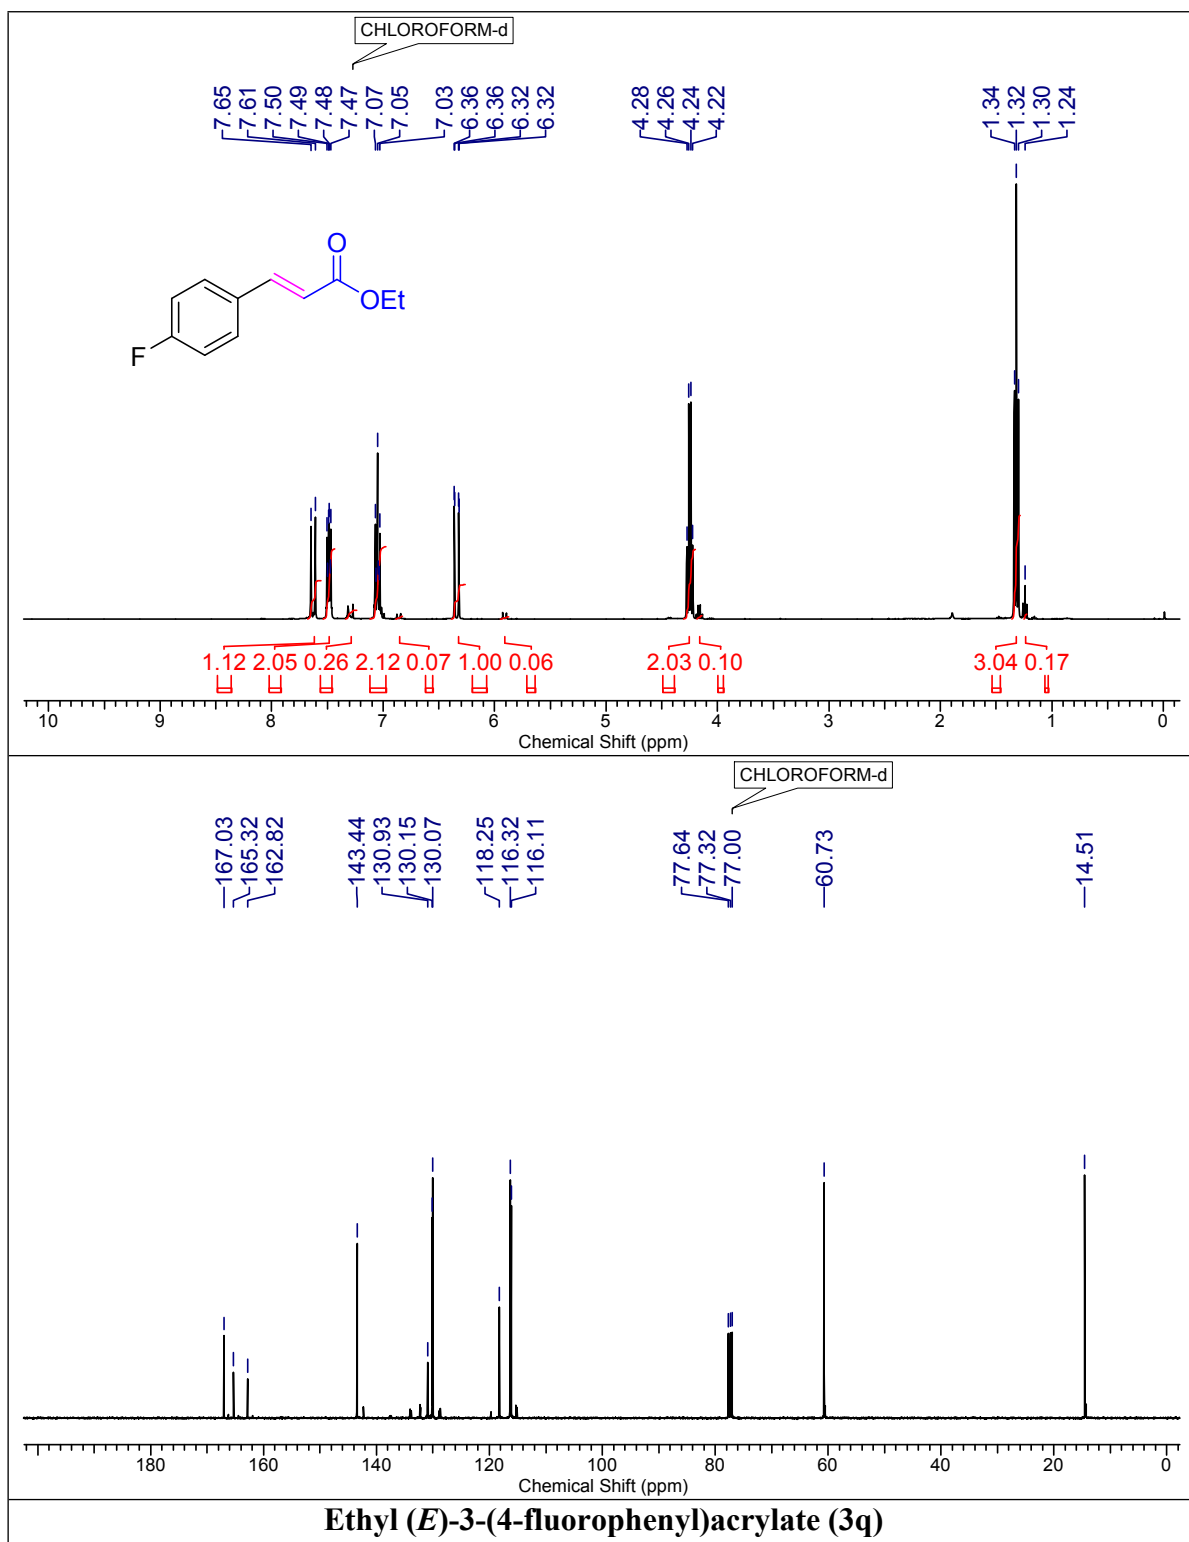

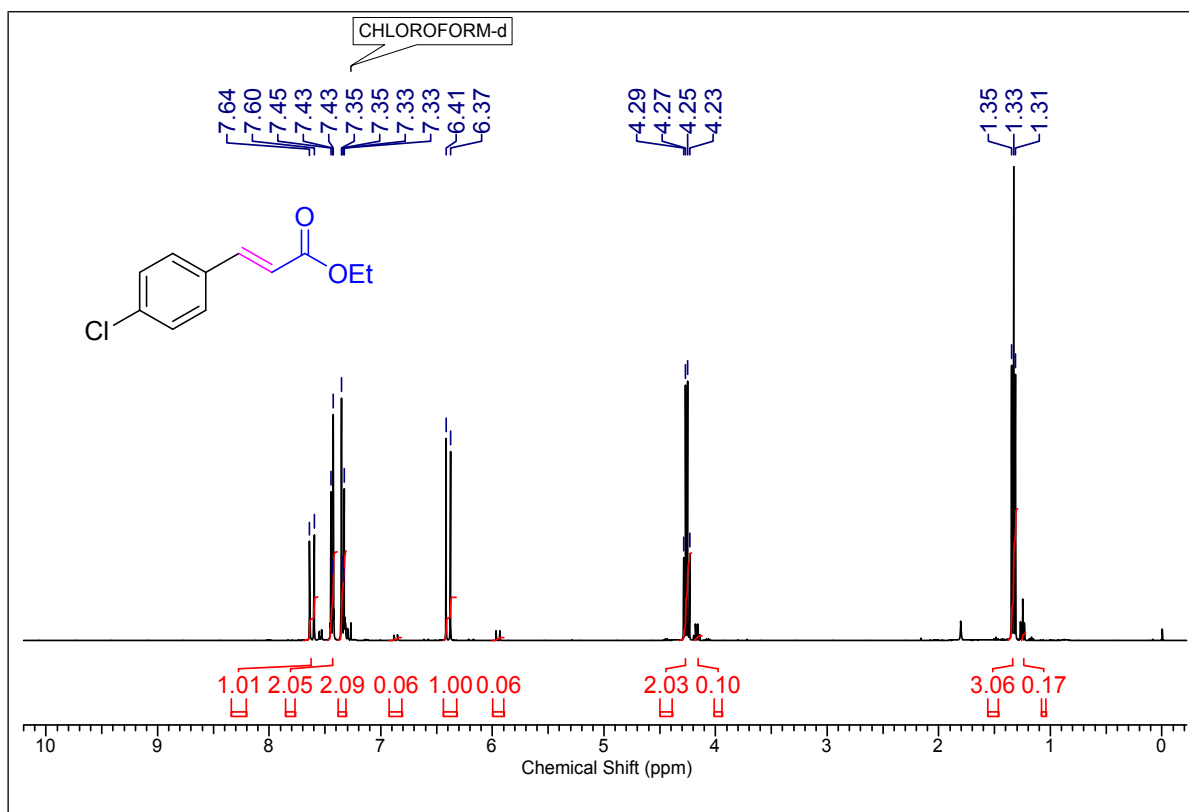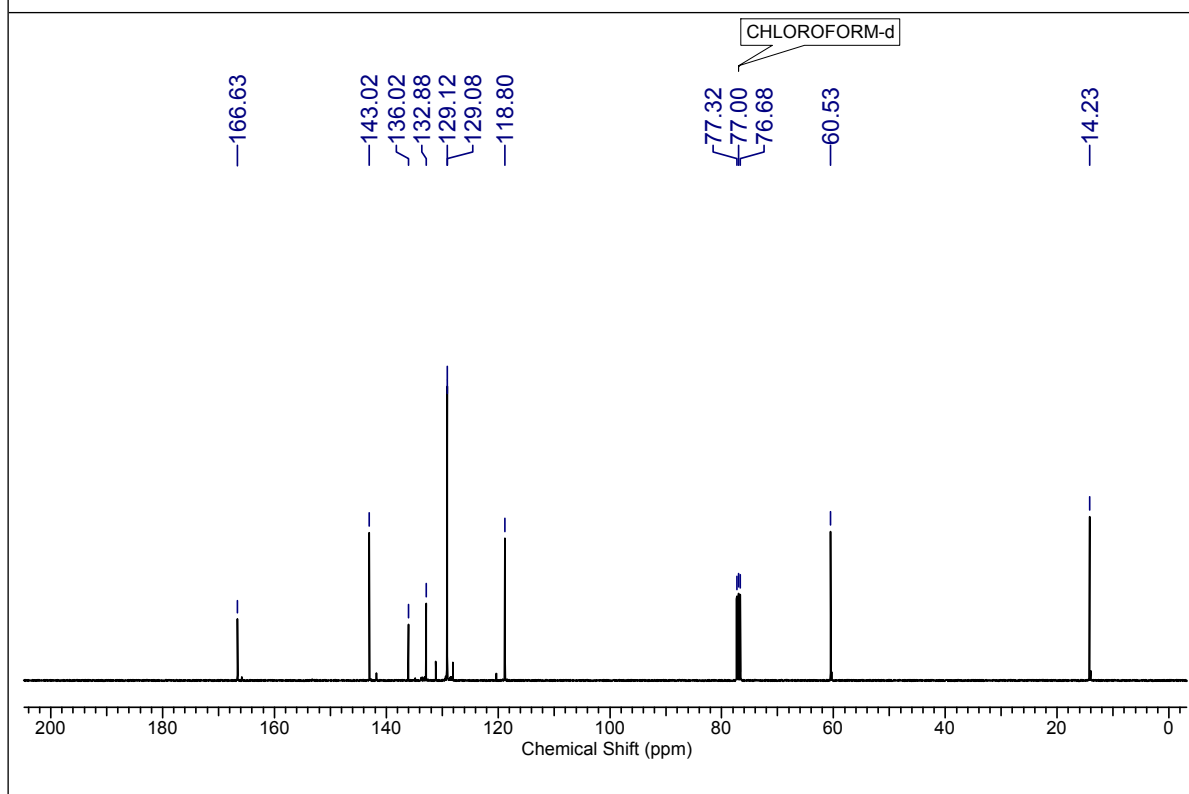

**Ethyl (*E*)-3-(4-chlorophenyl)acrylate (3r)**

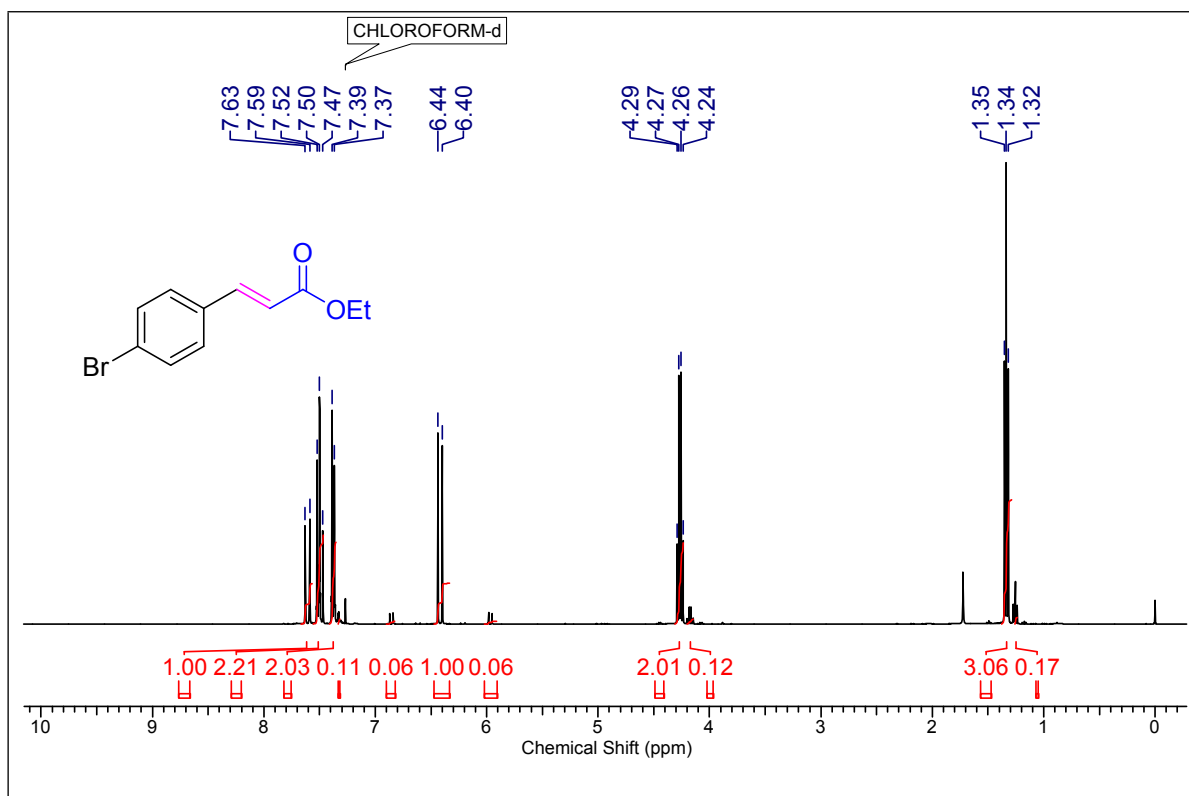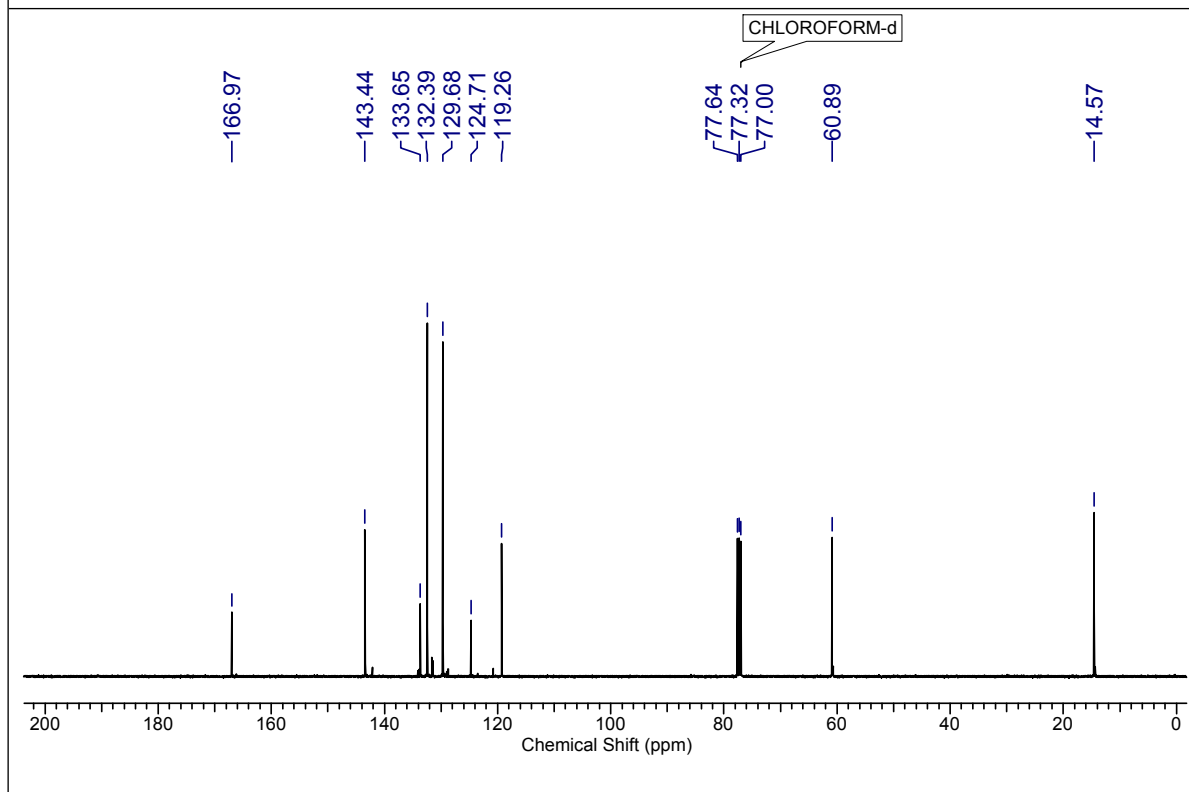

**Ethyl (E)-3-(4-bromophenyl)acrylate (3s)**

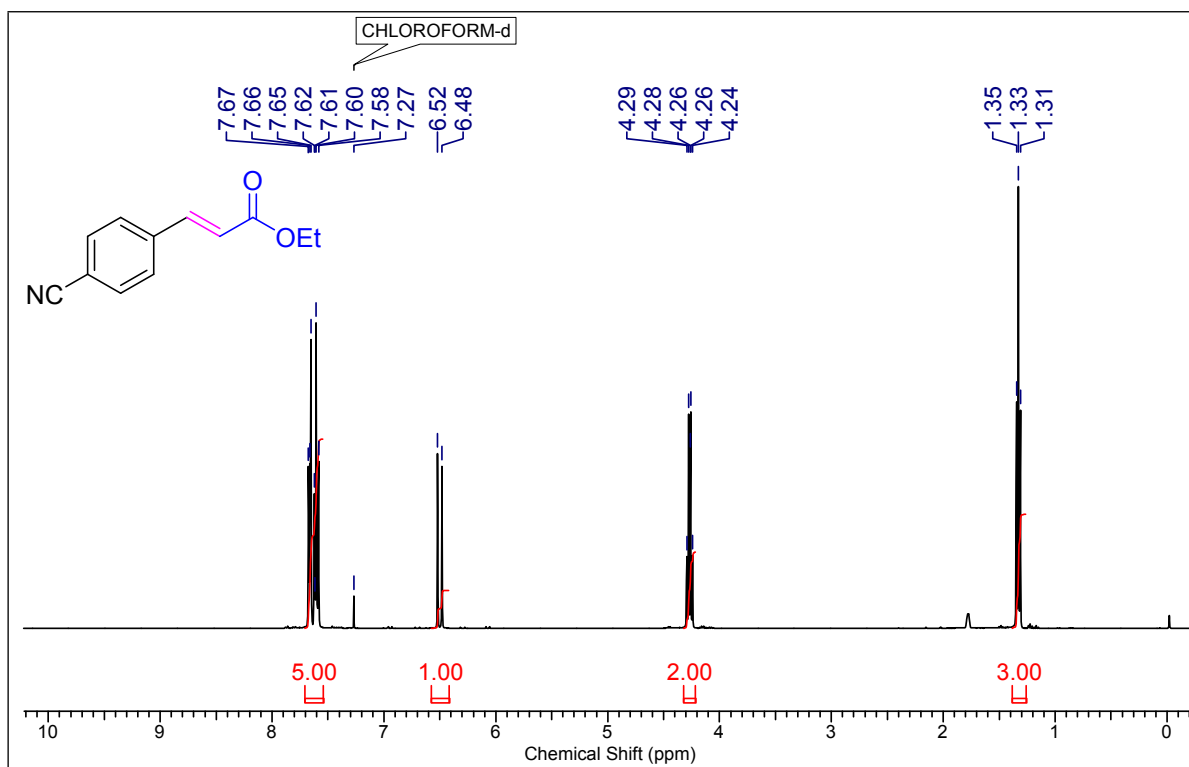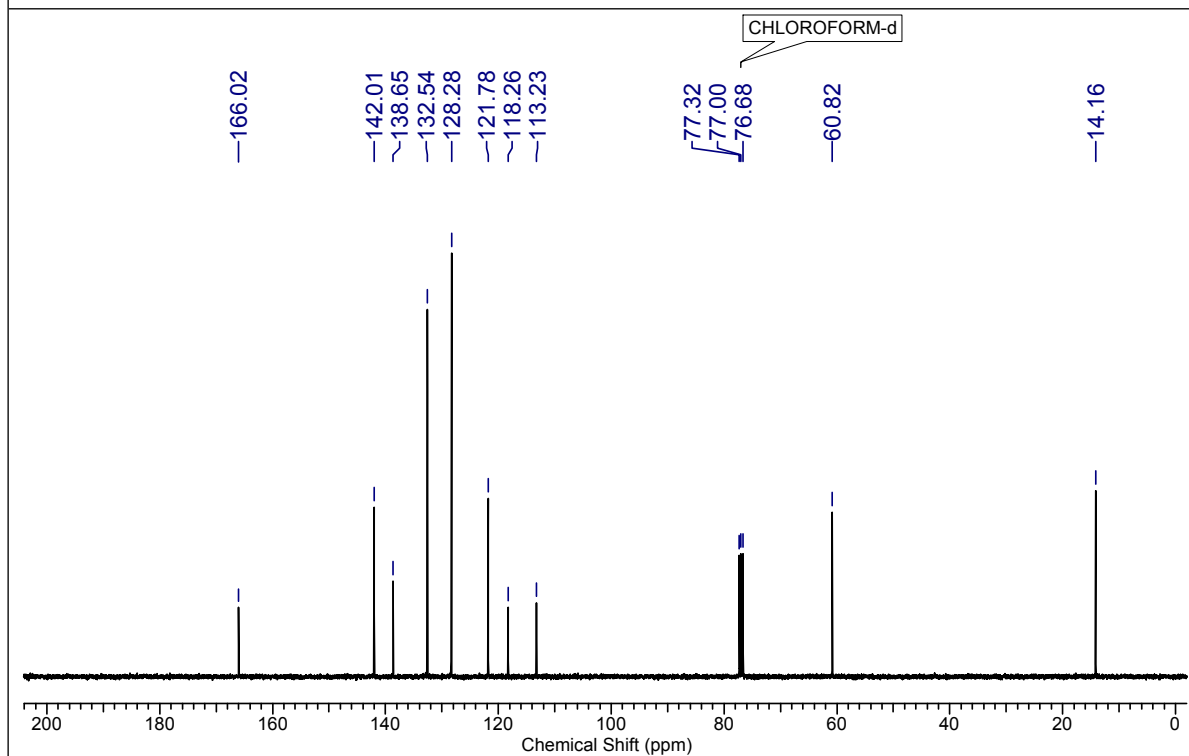

**Ethyl (*E*)-3-(4-cyanophenyl)acrylate (3t)**

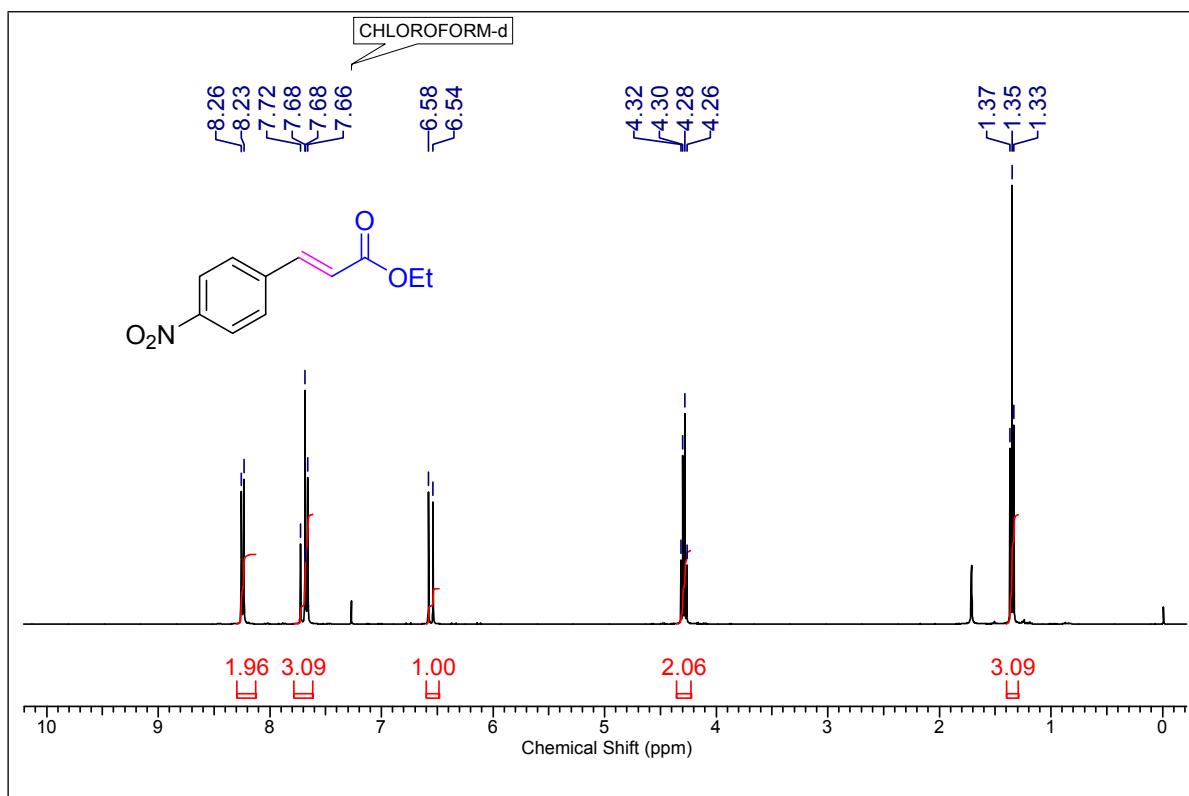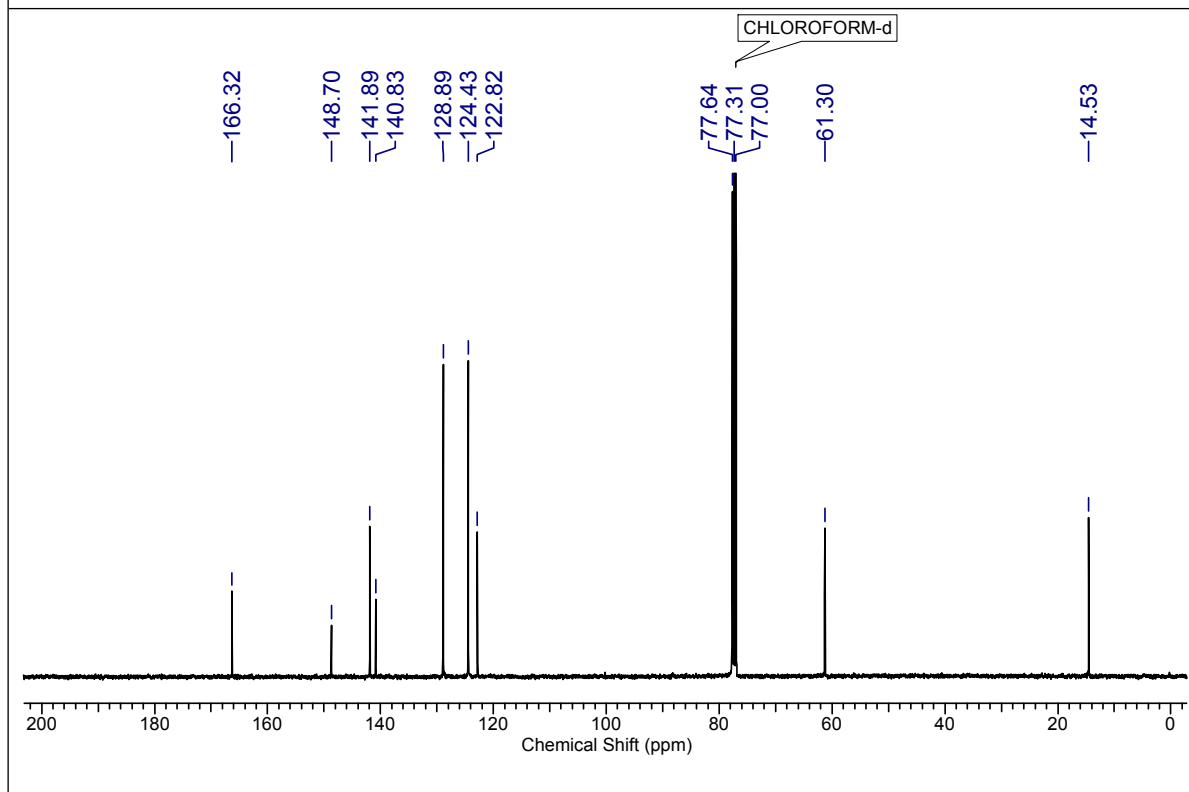

**Ethyl (*E*)-3-(4-nitrophenyl) acrylate (3u)**

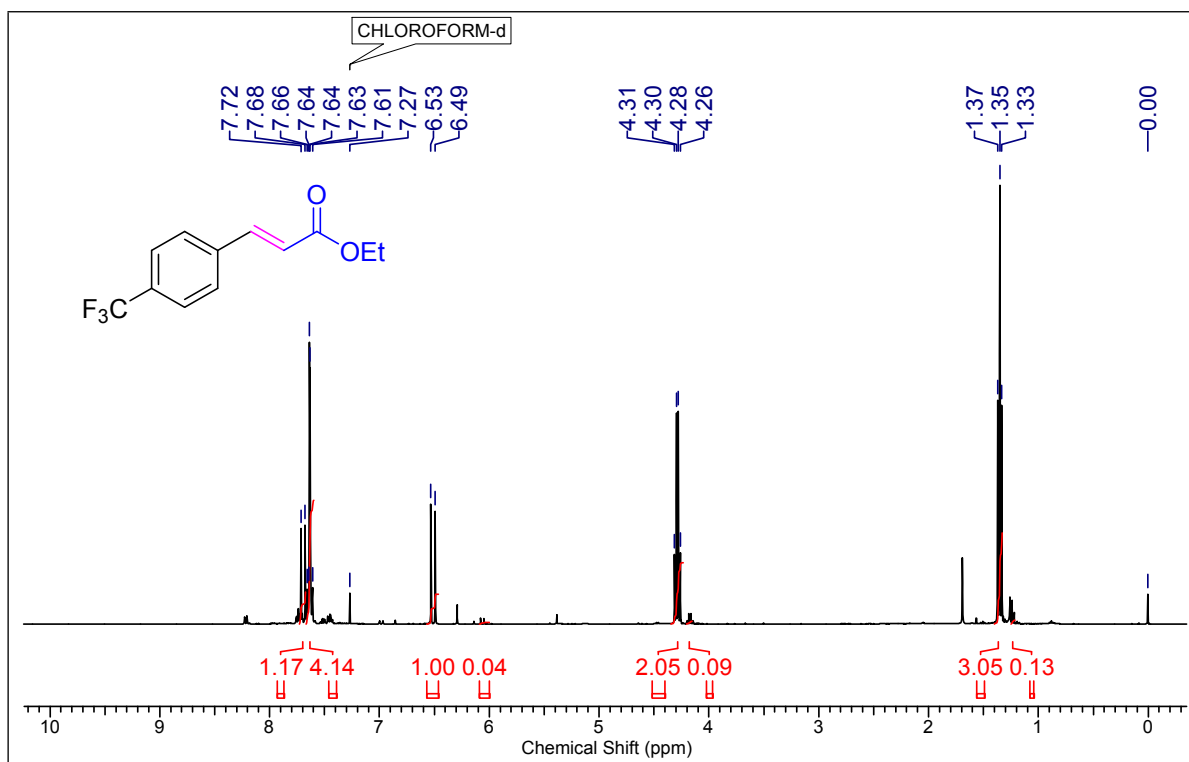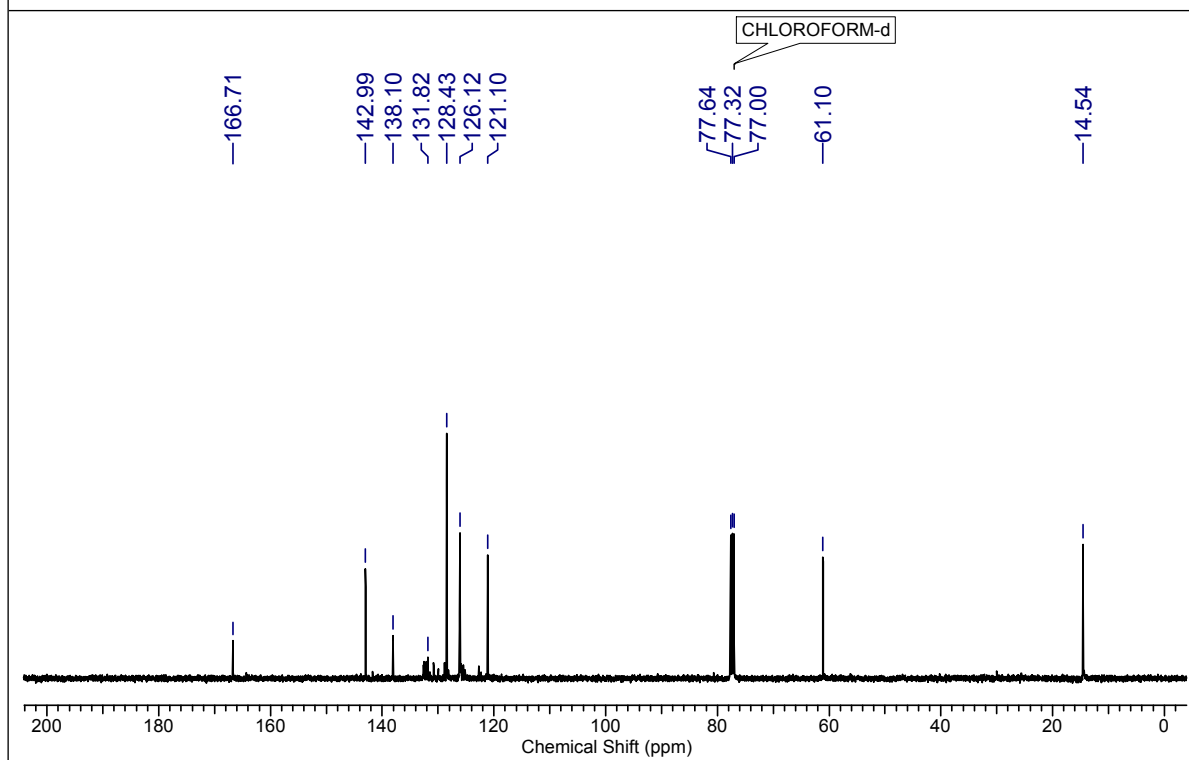

**Ethyl (*E*)-3-(4-(trifluoromethyl)phenyl)acrylate (3v)**

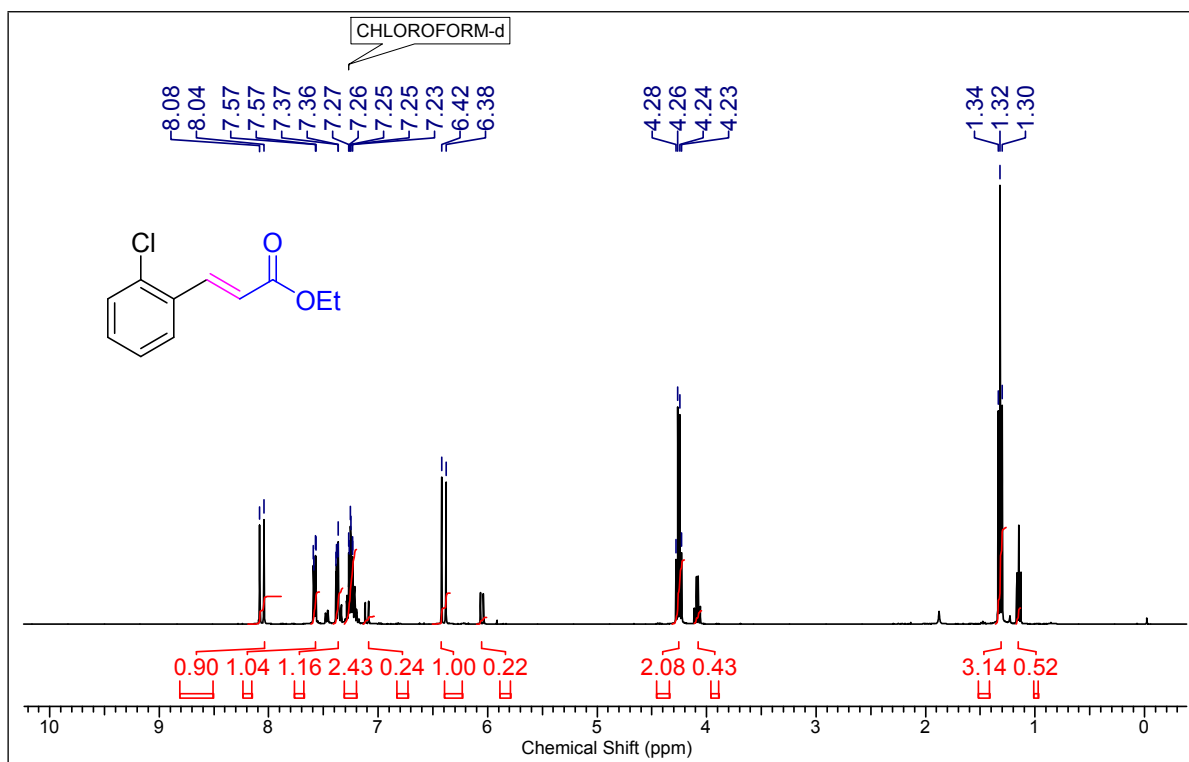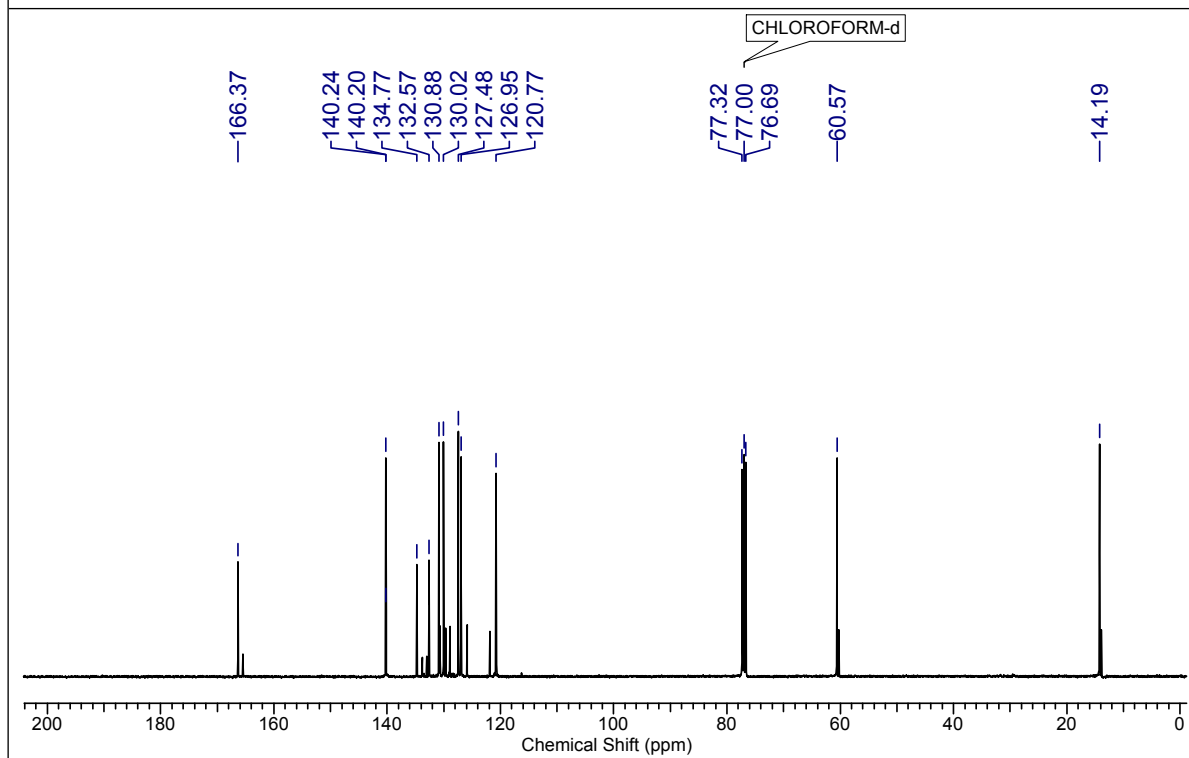

**Ethyl (*E*)-3-(2-chlorophenyl)acrylate (3w)**



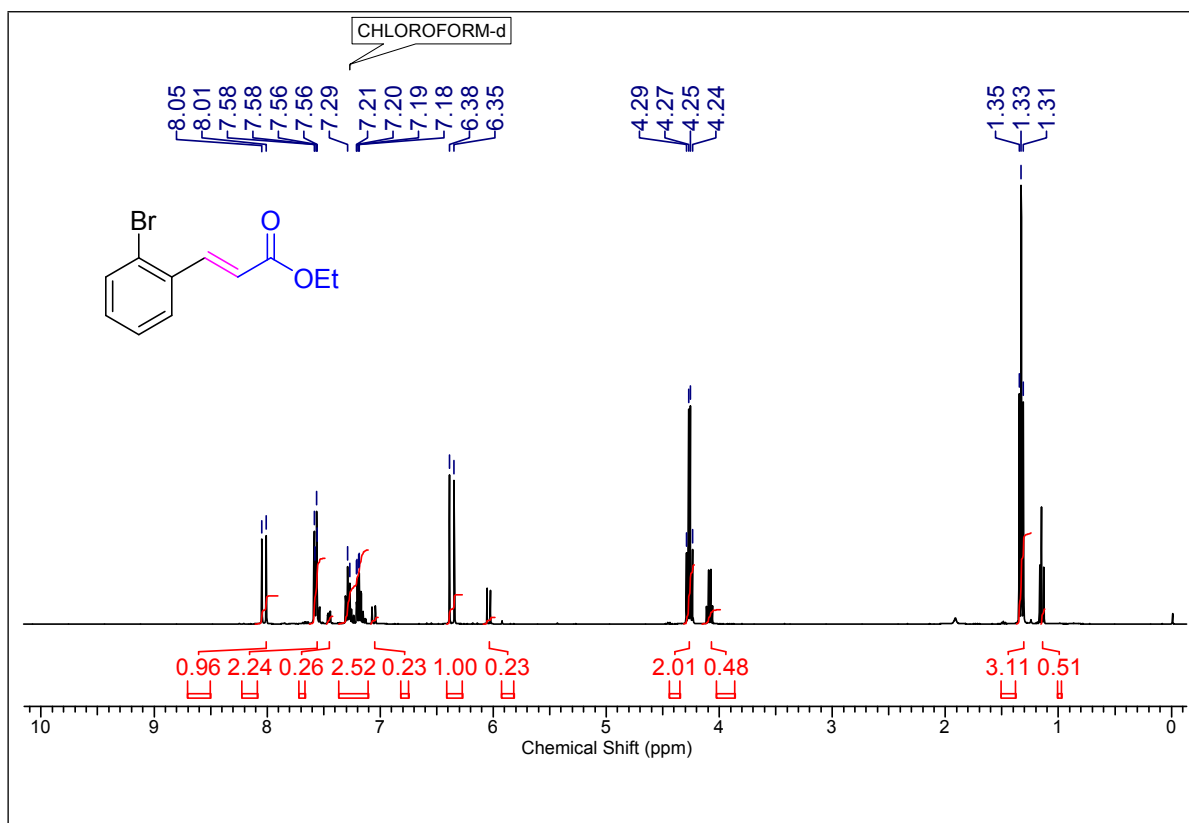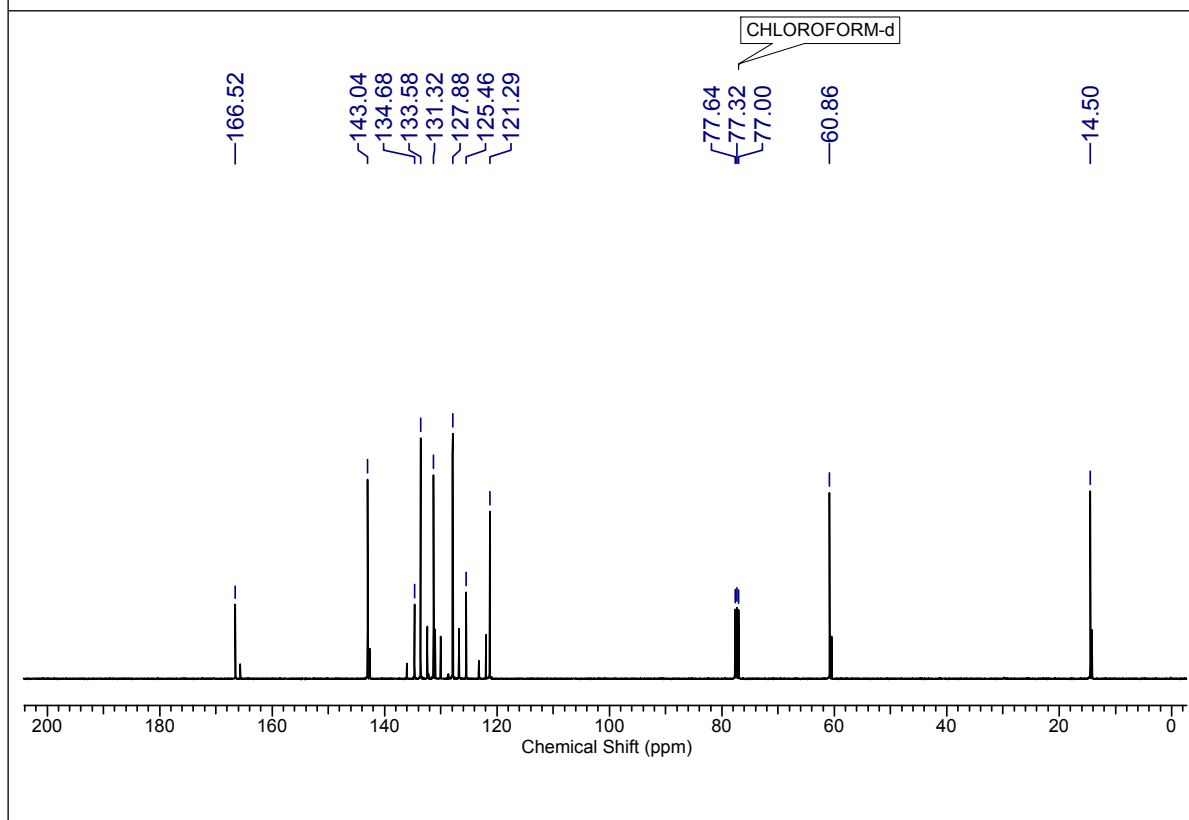

**Ethyl (*E*)-3-(2-bromophenyl)acrylate (3x)**

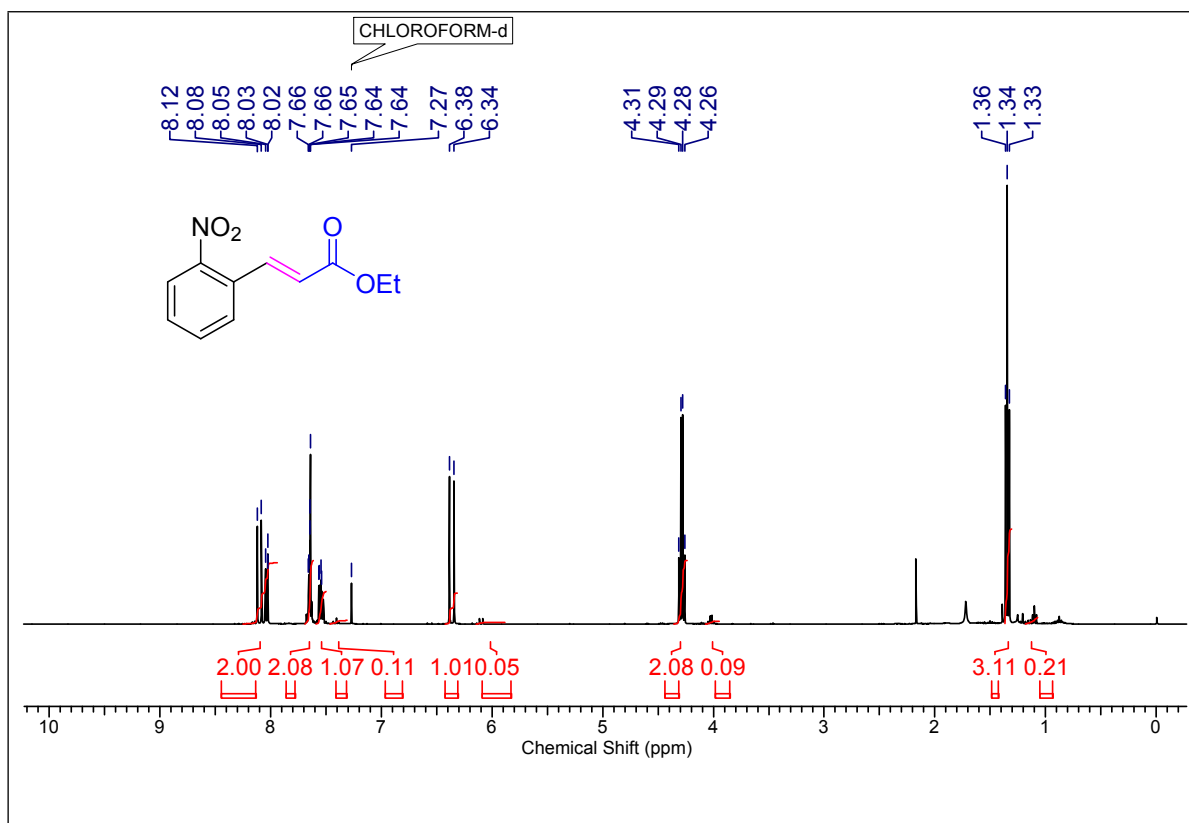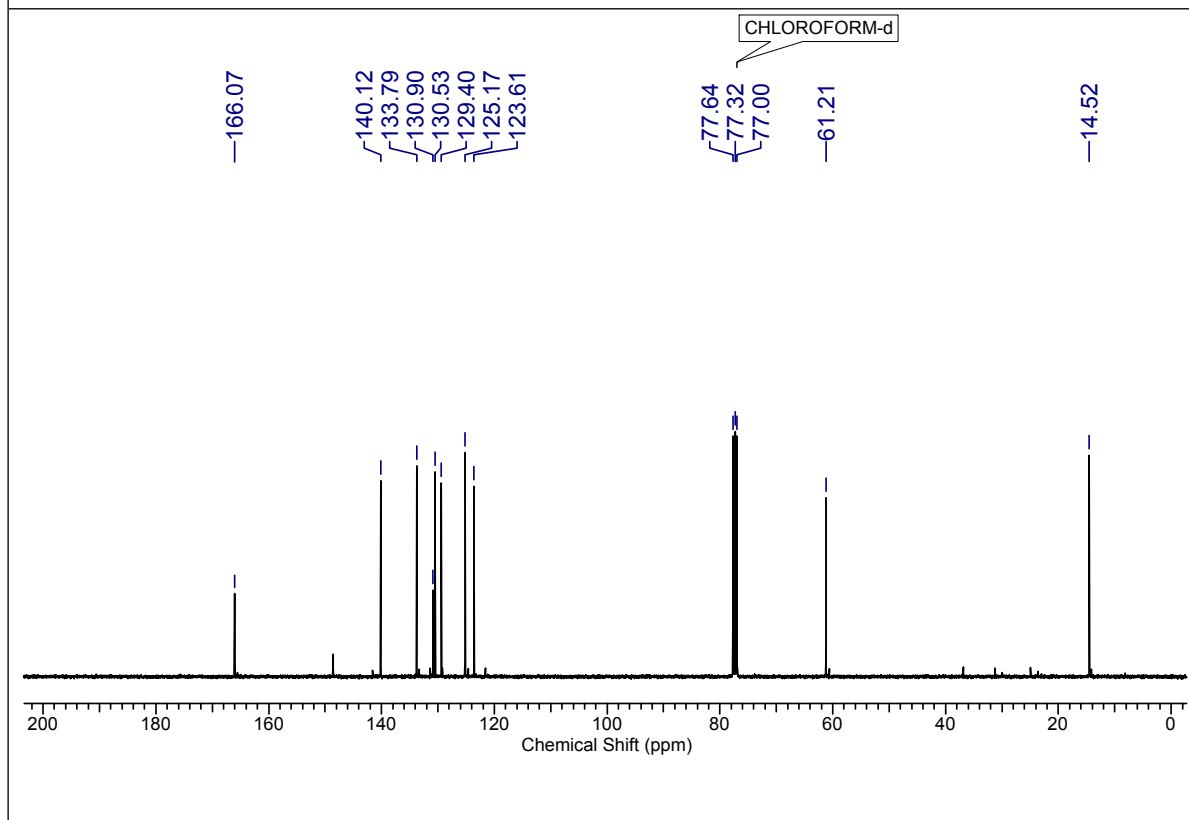

**Ethyl (*E*)-3-(2-nitrophenyl) acrylate (3y)**

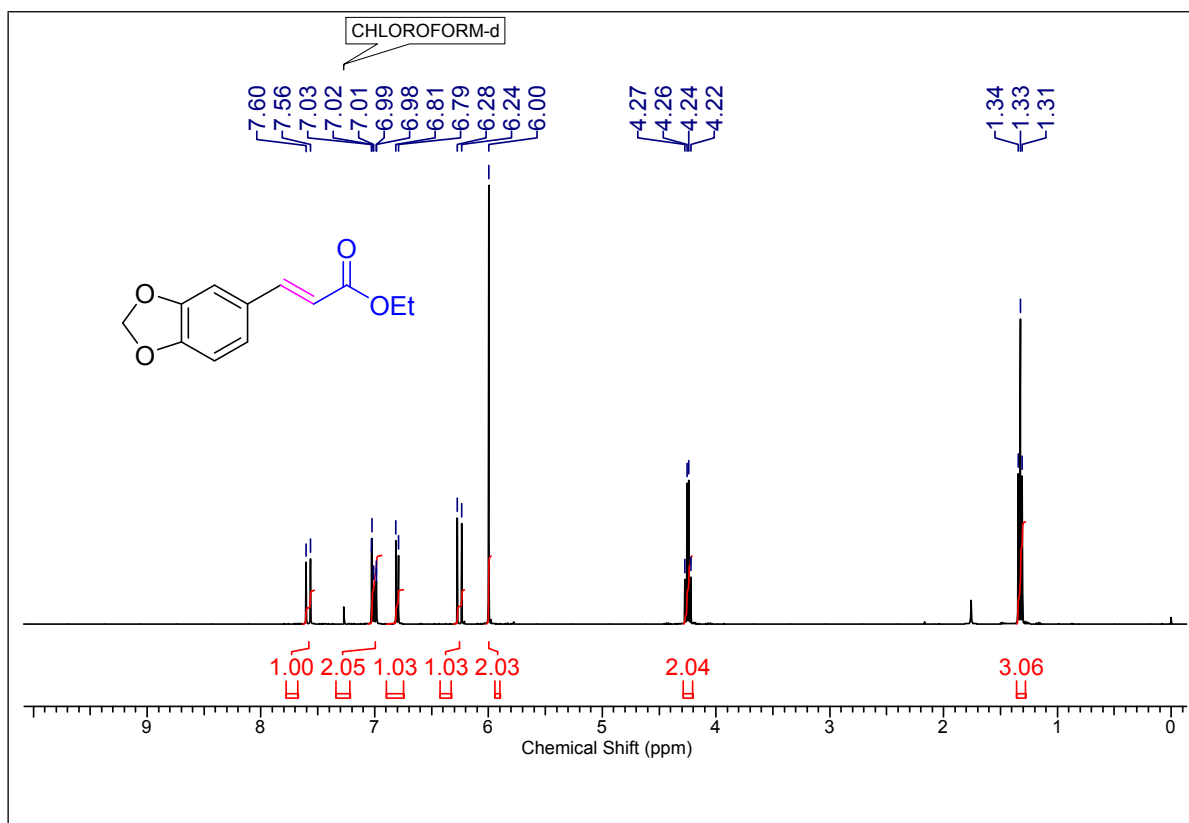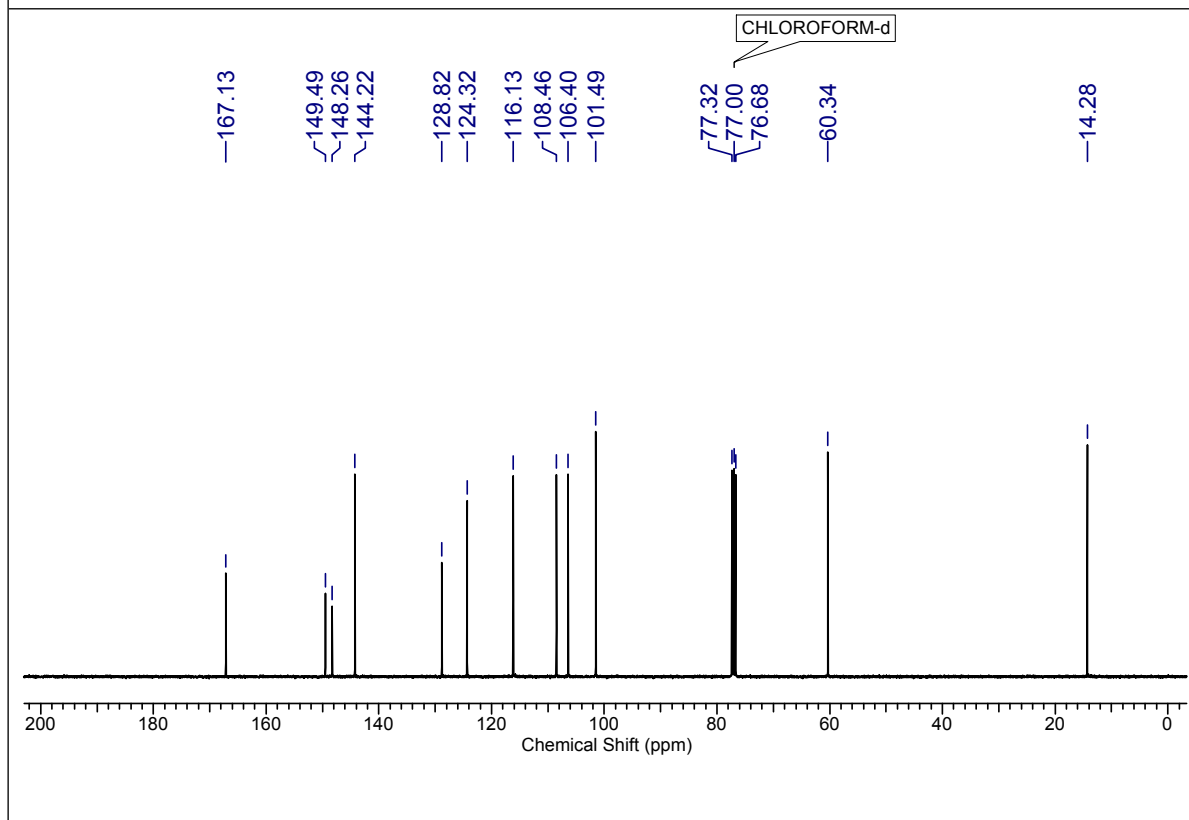

**Ethyl (*E*)-3-(benzo[*d*][1,3]dioxol-5-yl)acrylate (3z)**

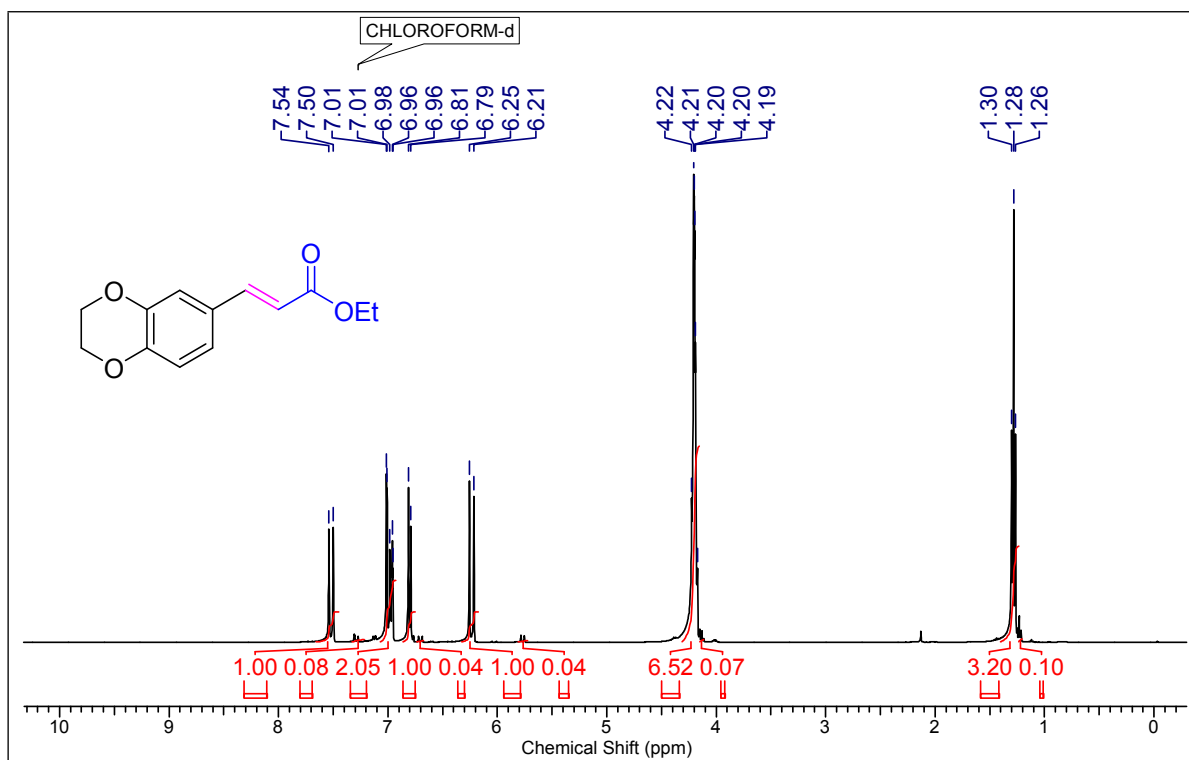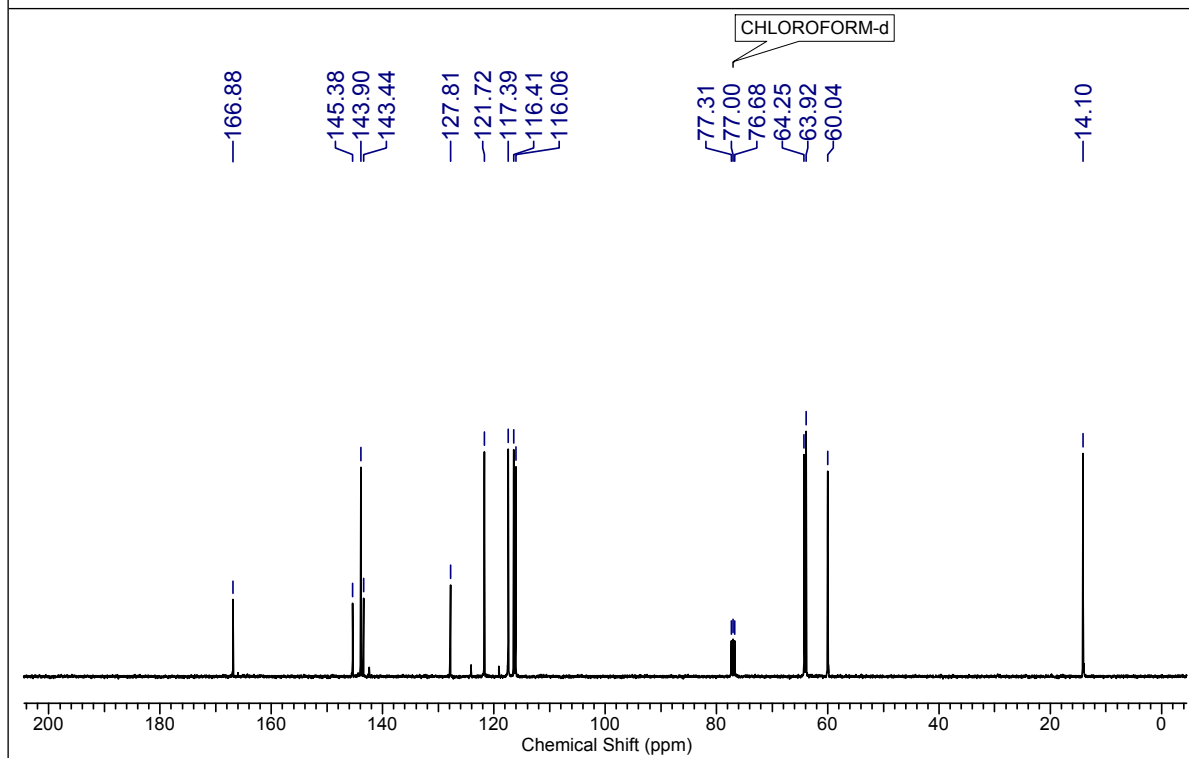

**Ethyl (*E*)-3-(2,3-dihydrobenzo[*b*][1,4]dioxin-6-yl)acrylate (3aa)**

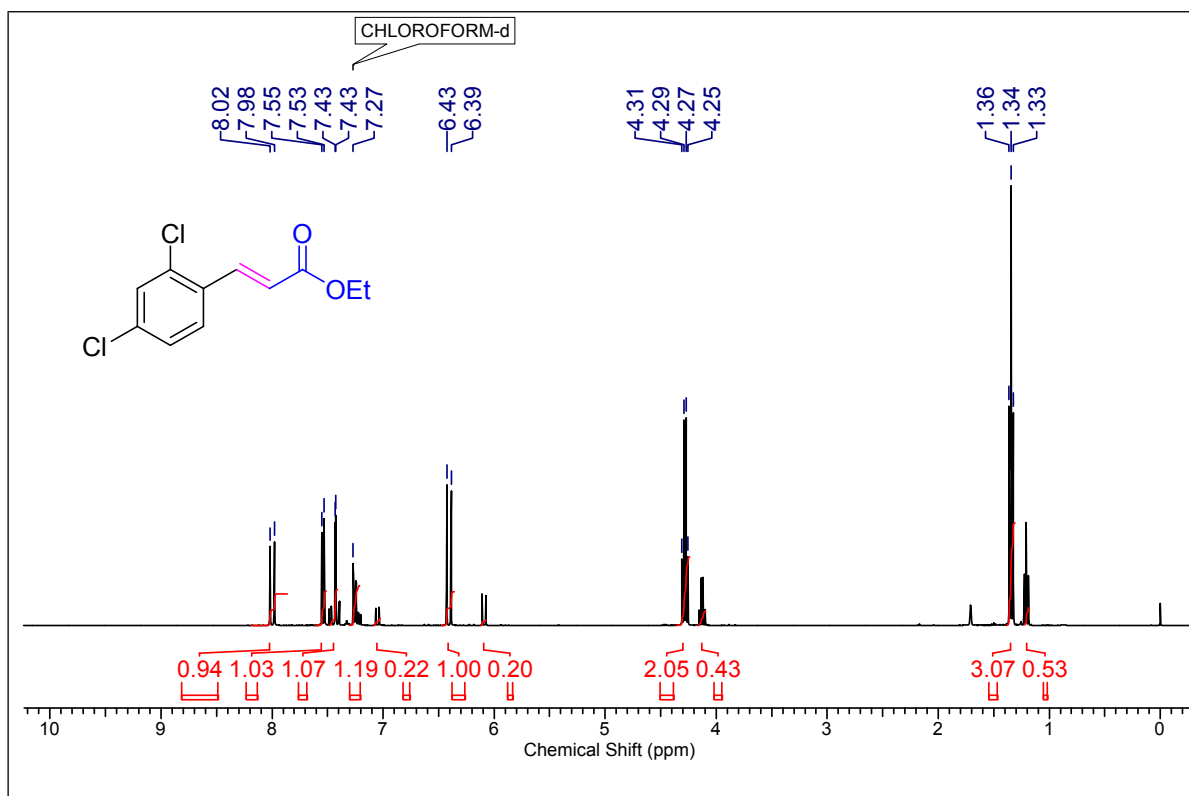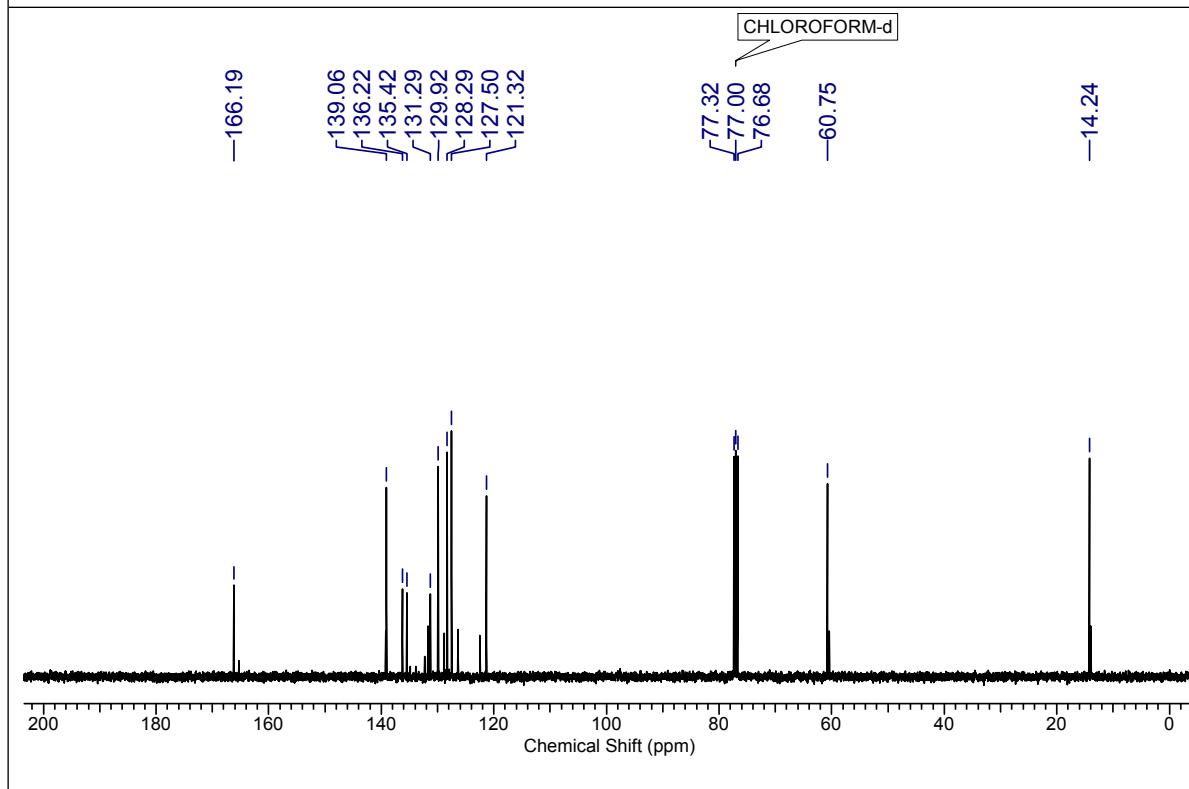

**Ethyl (E)-3-(2,4-dichlorophenyl)acrylate (3ab)**

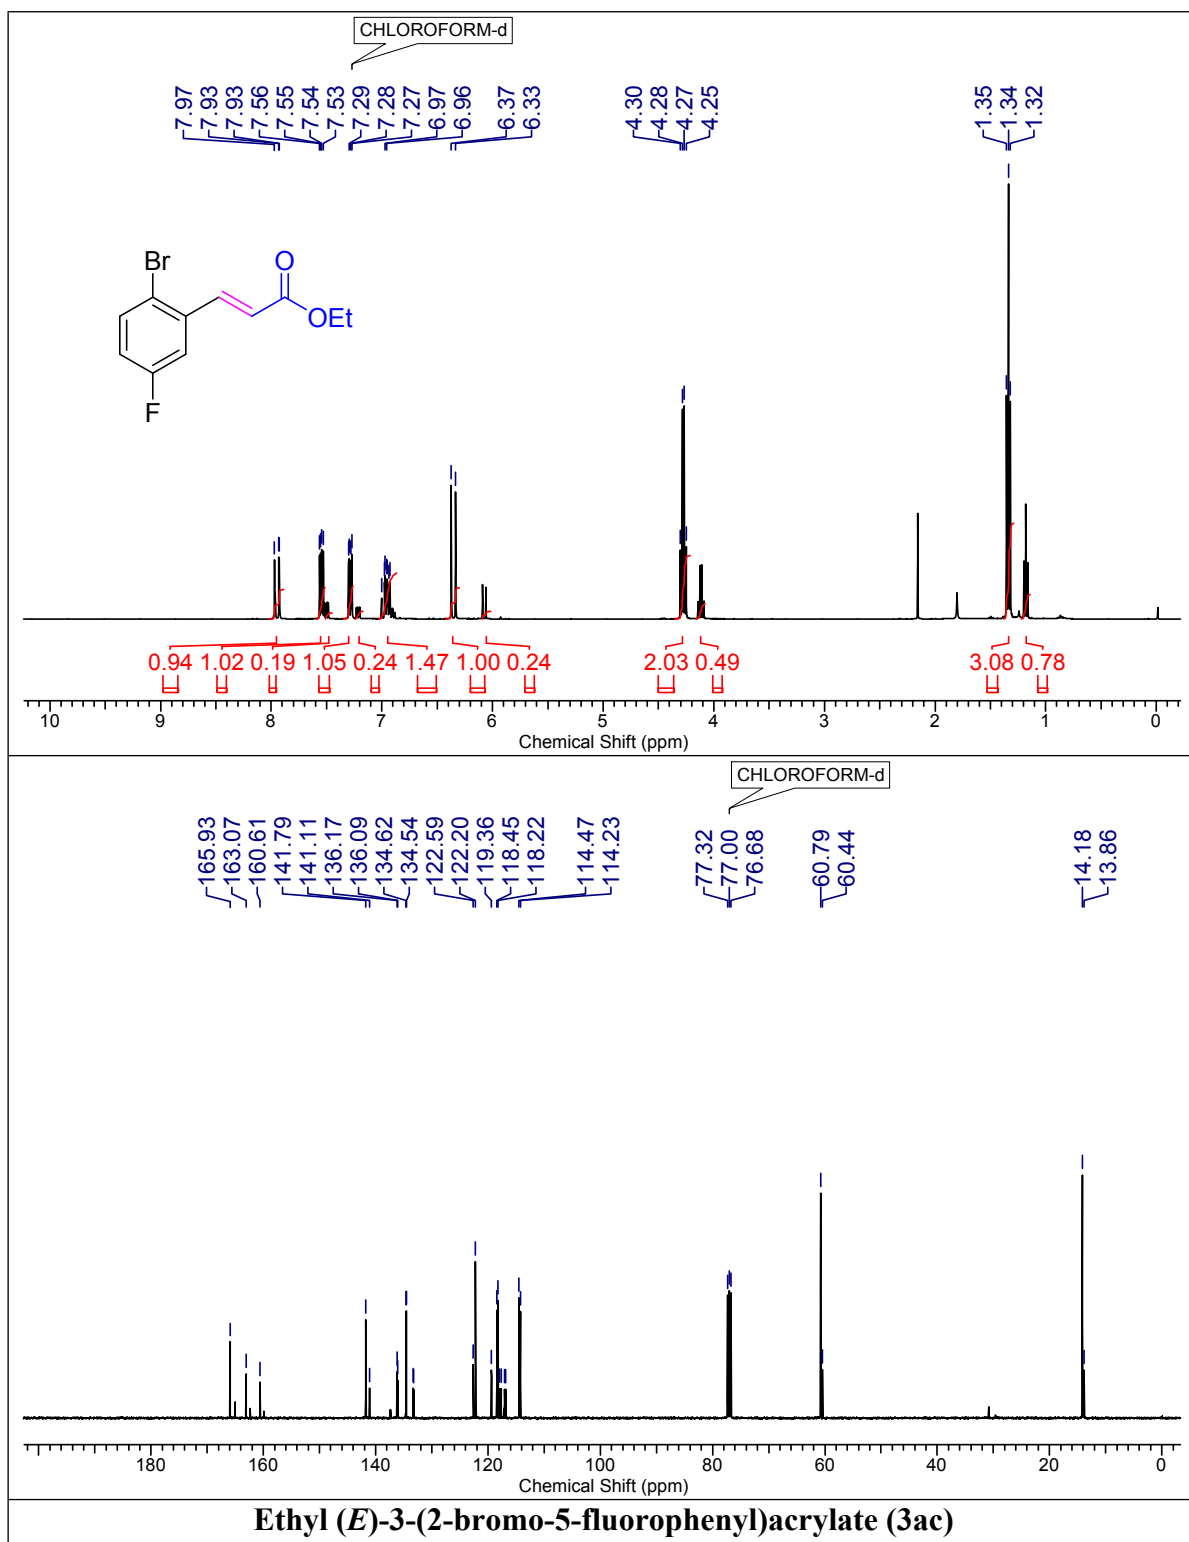

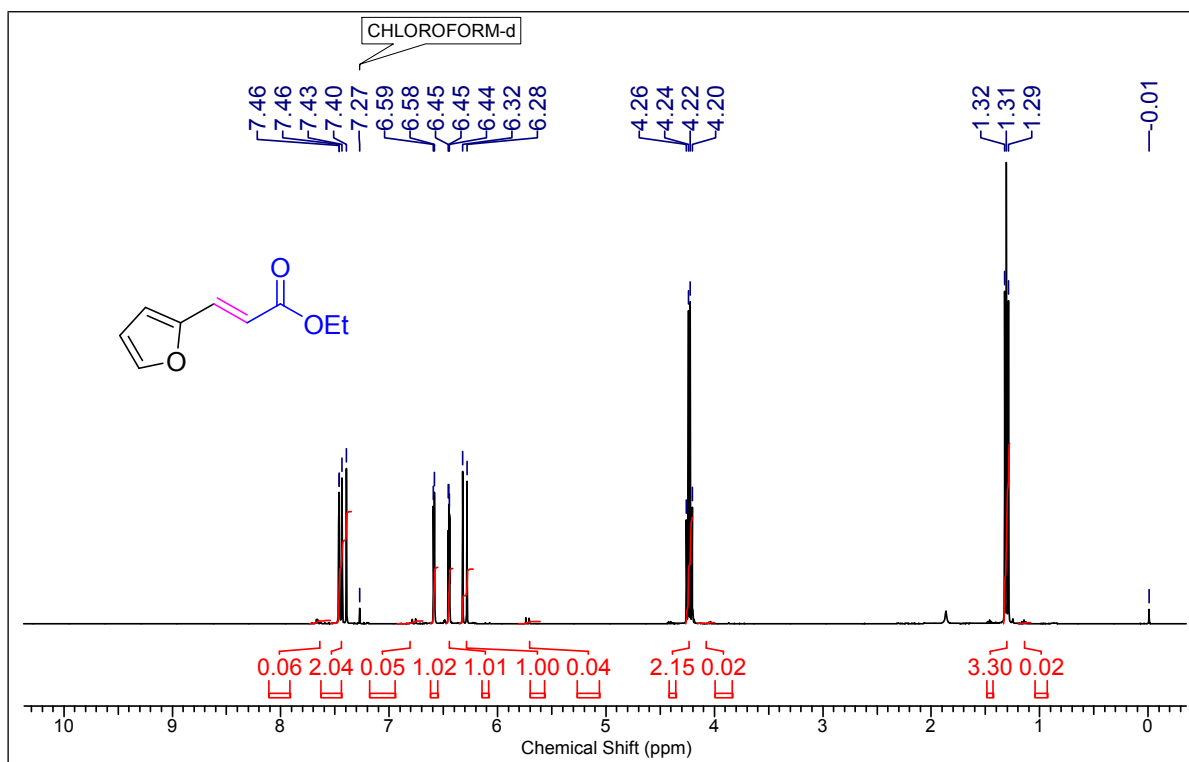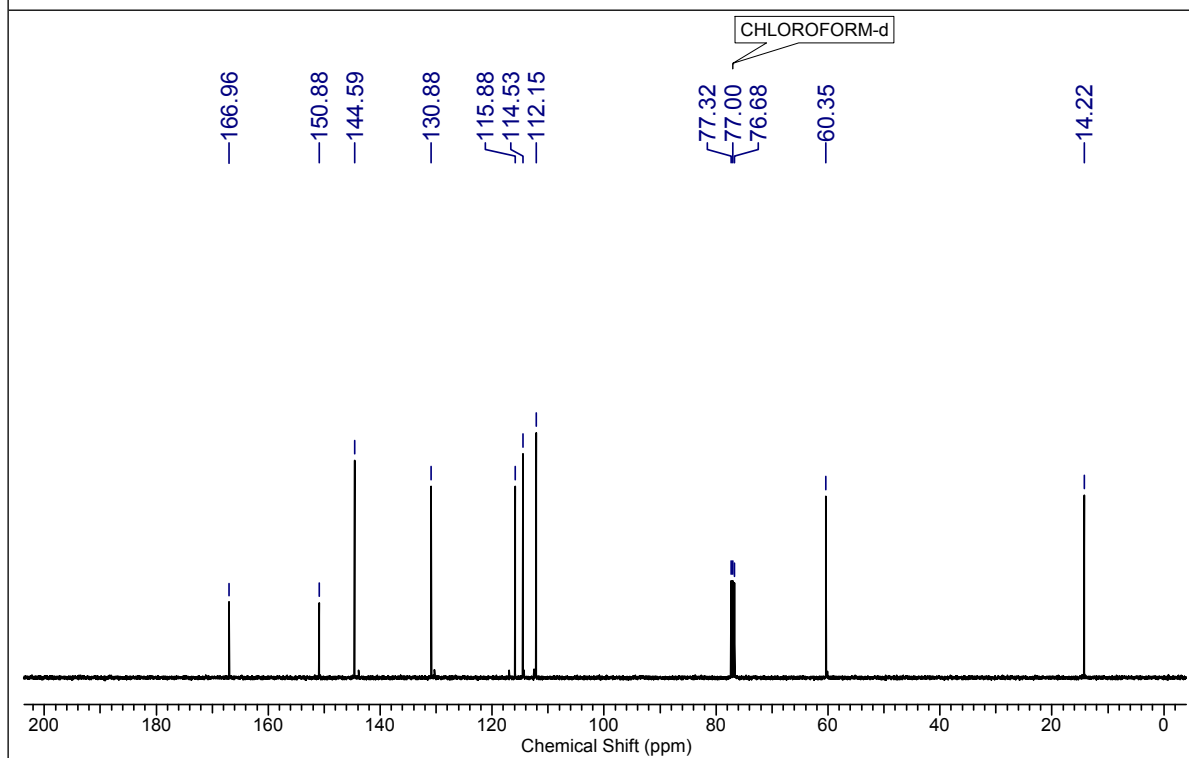

**Ethyl (*E*)-3-(furan-2-yl)acrylate (3ad)**

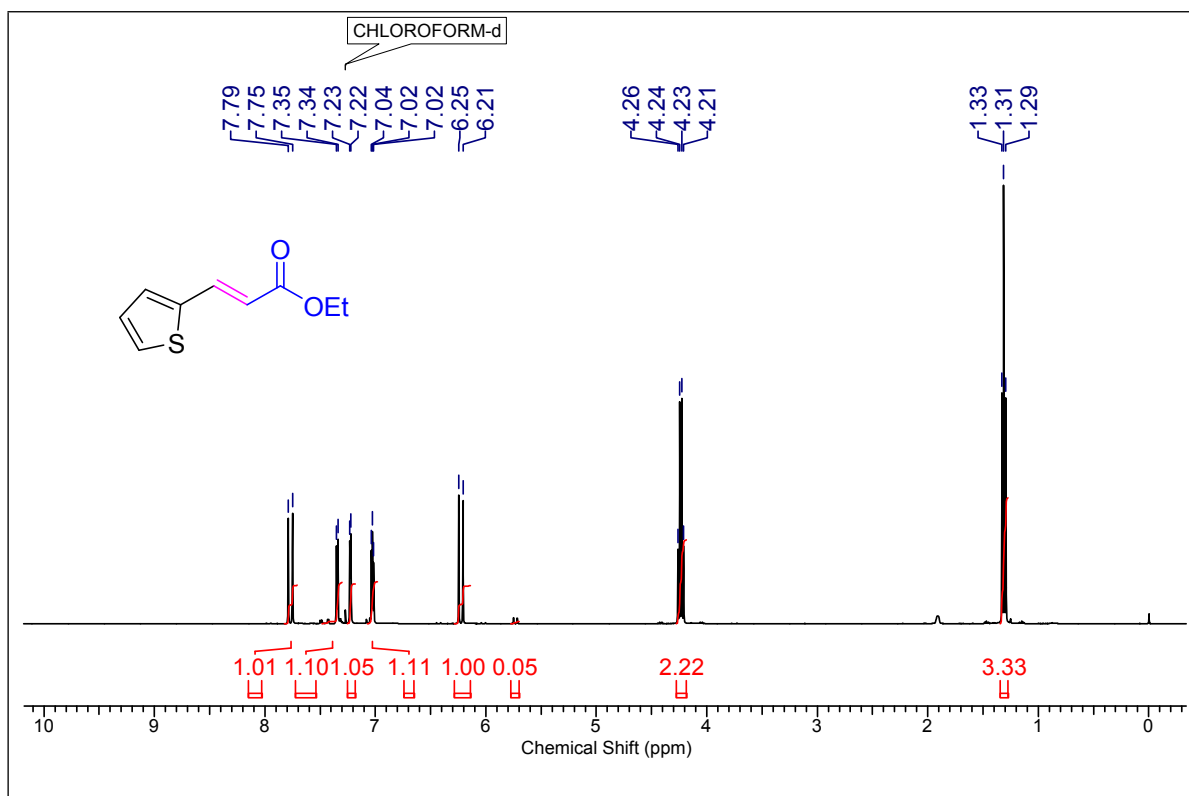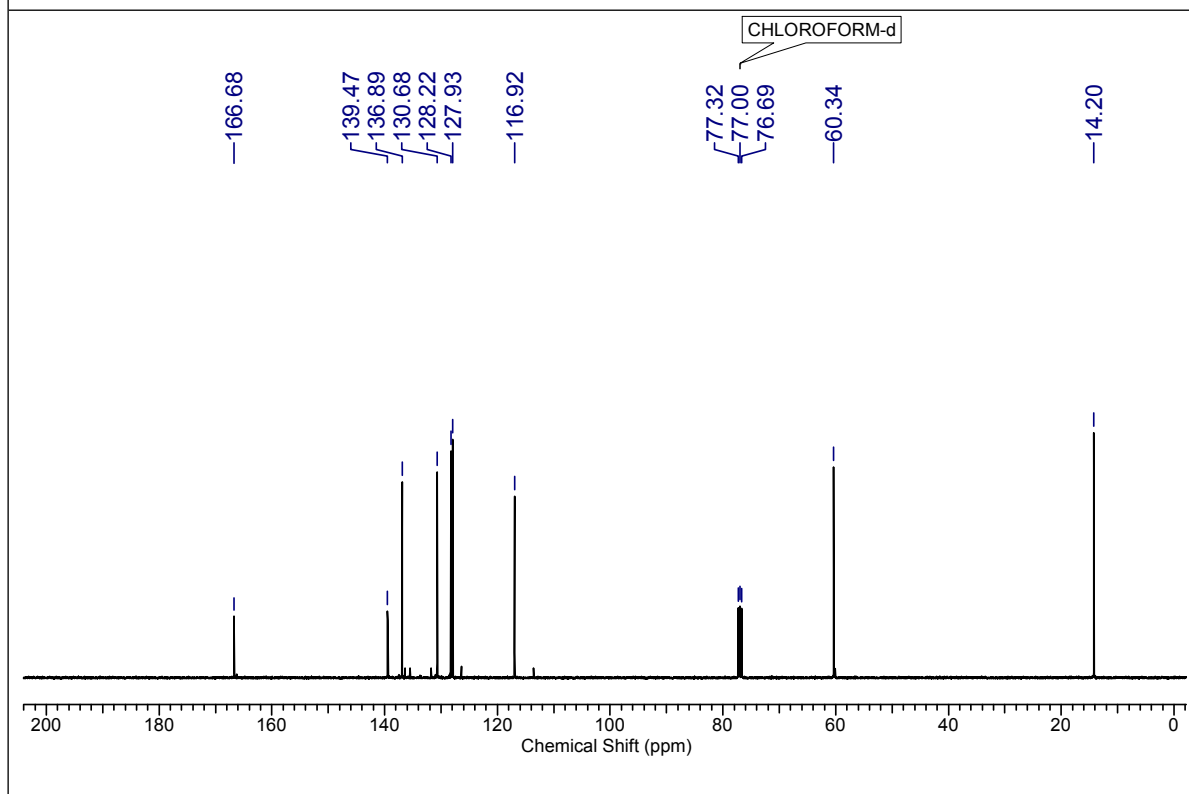

**Ethyl (E)-3-(thiophen-2-yl) acrylate (3ae)**



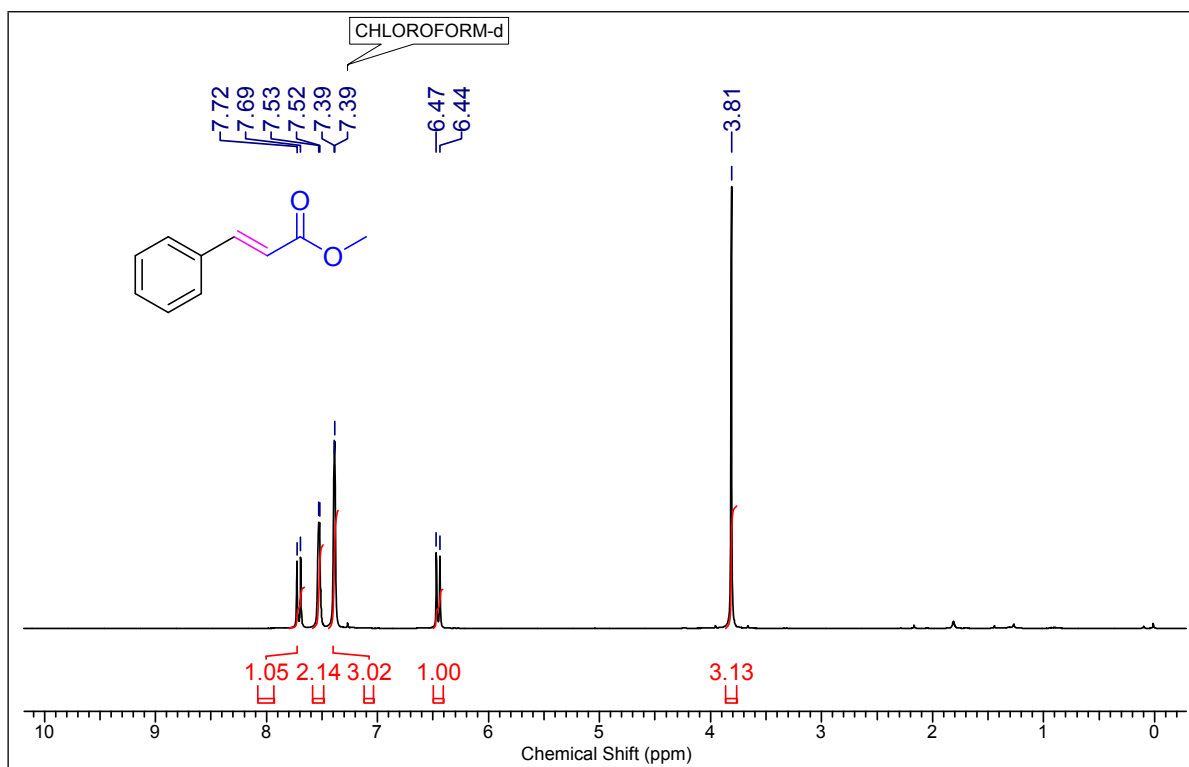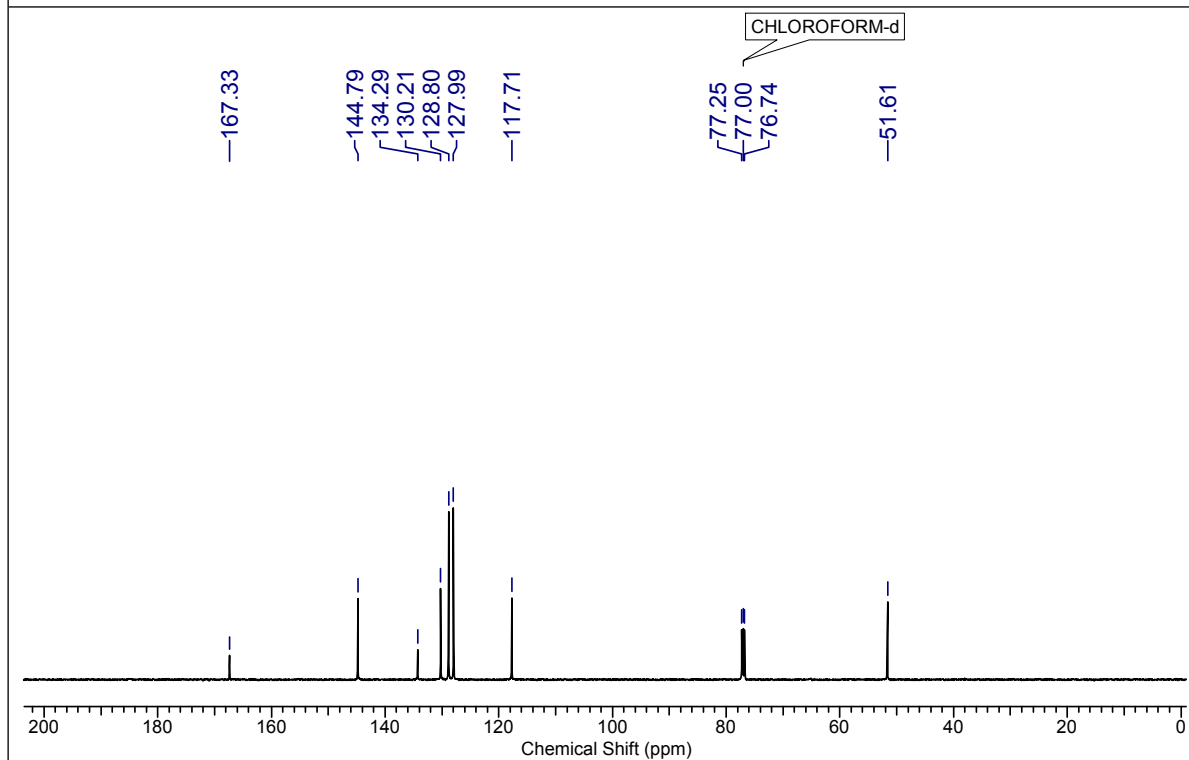

**(E)- Methyl Cinnamate (5a)**

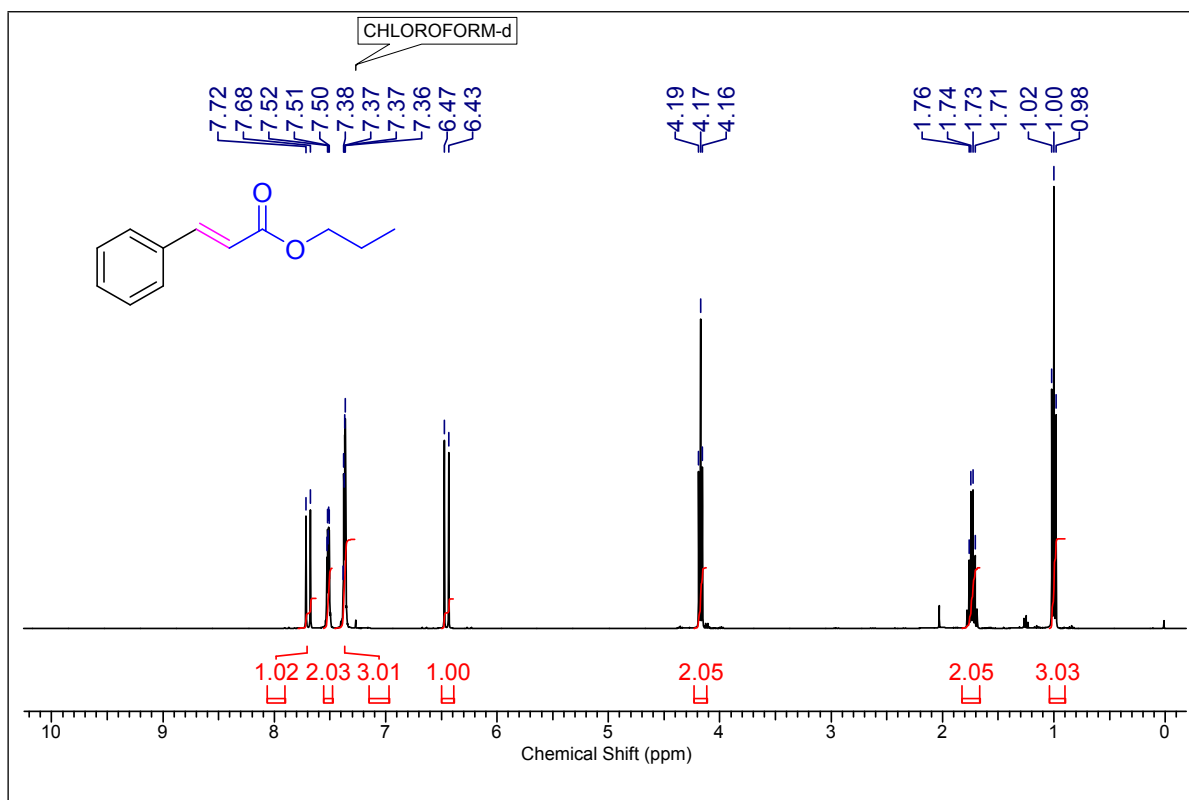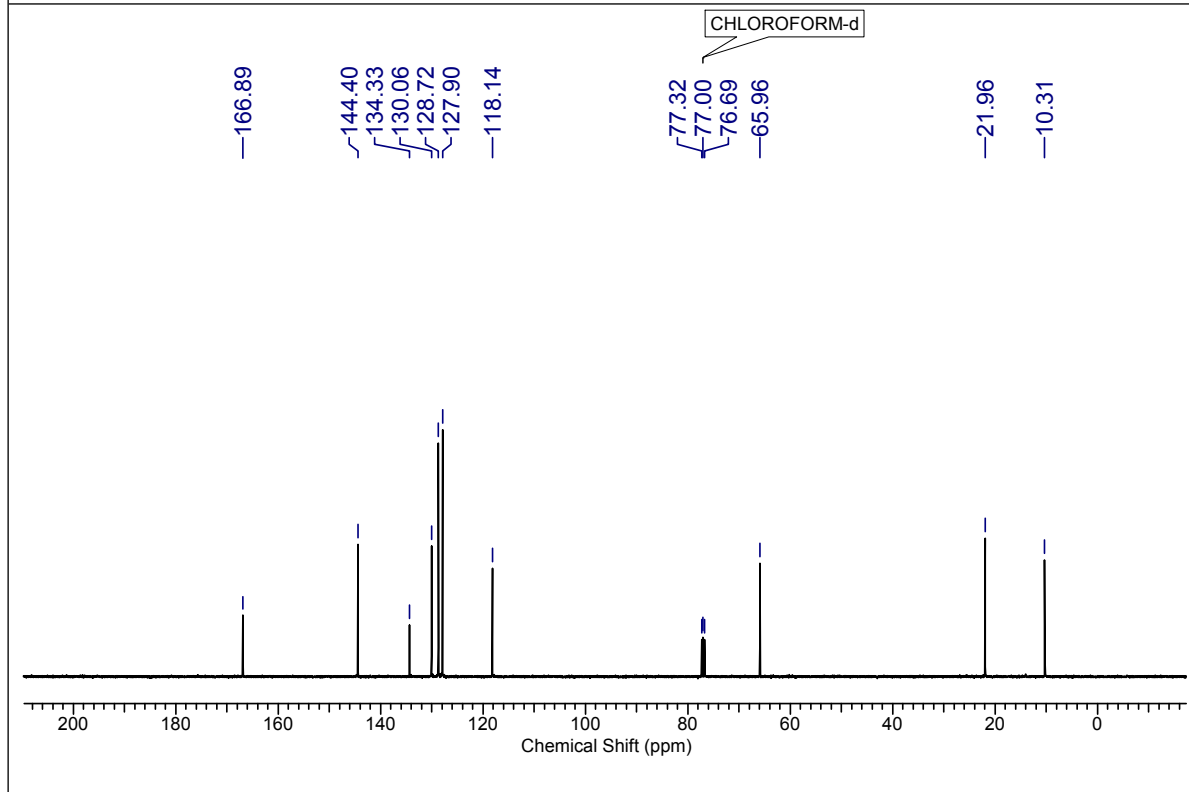

**(E)- Propyl cinnamate (5b)**

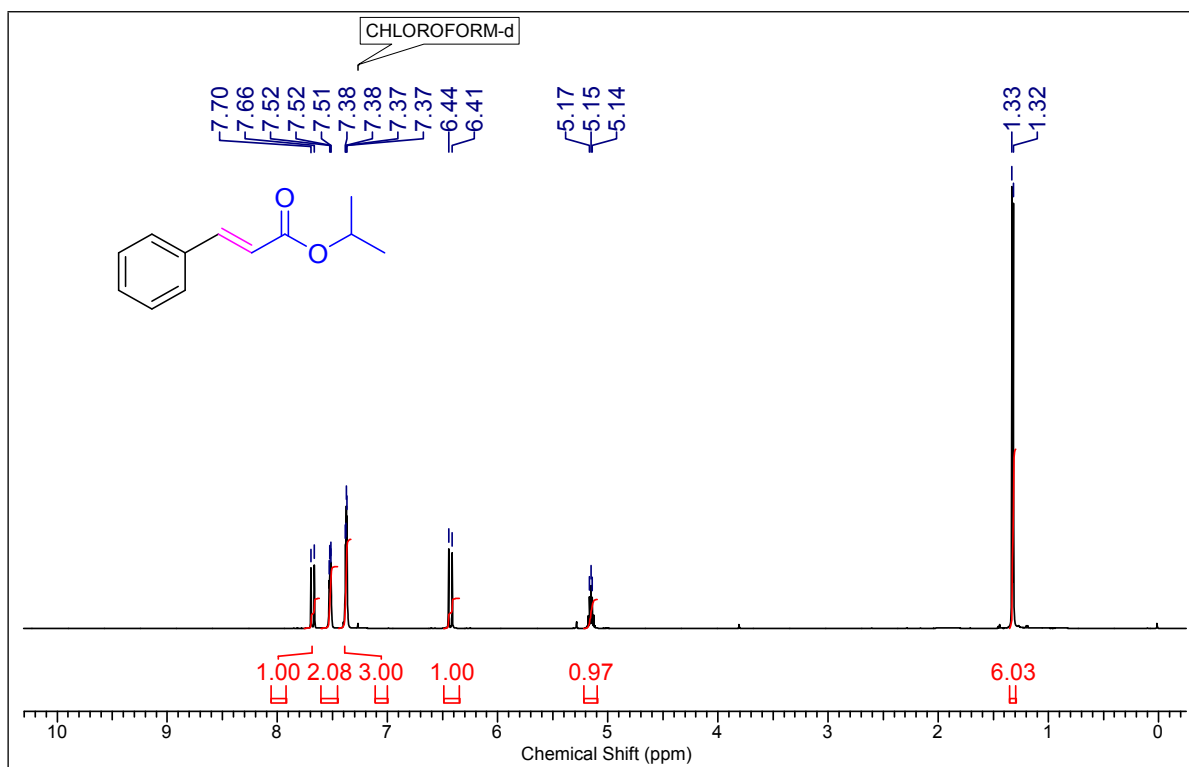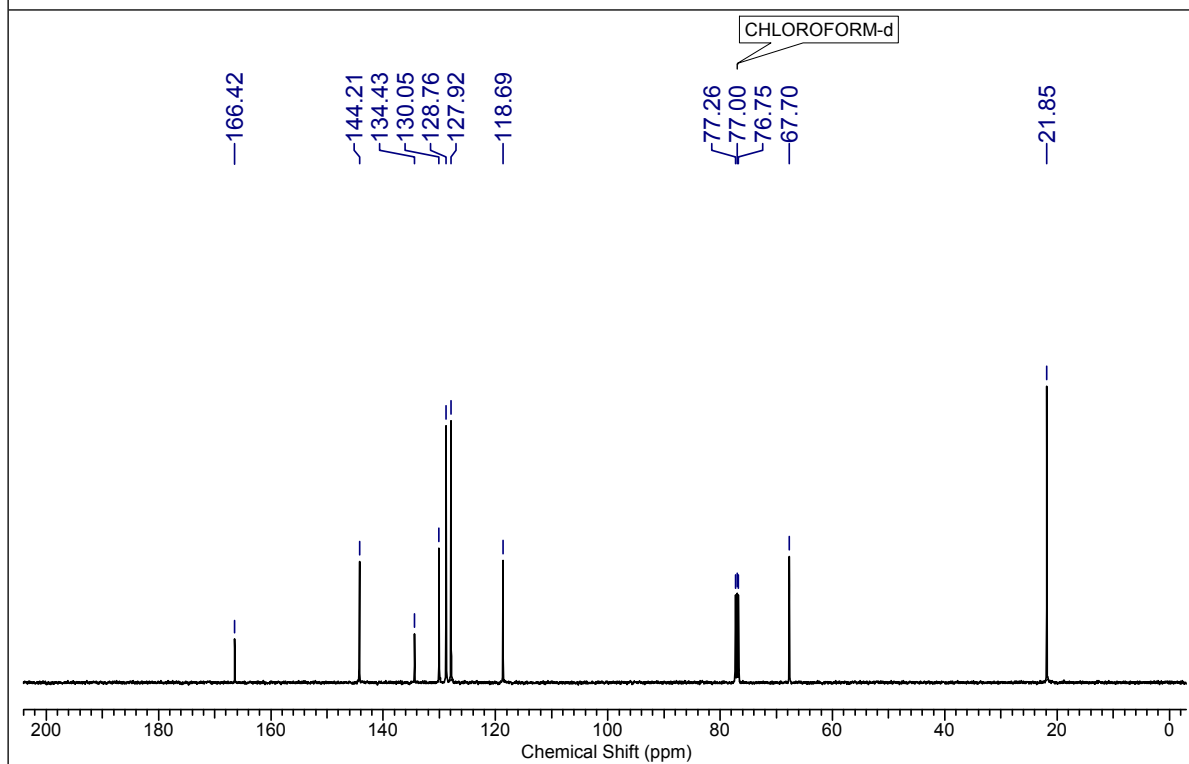

***(E)*- Isopropyl cinnamate(5c)**

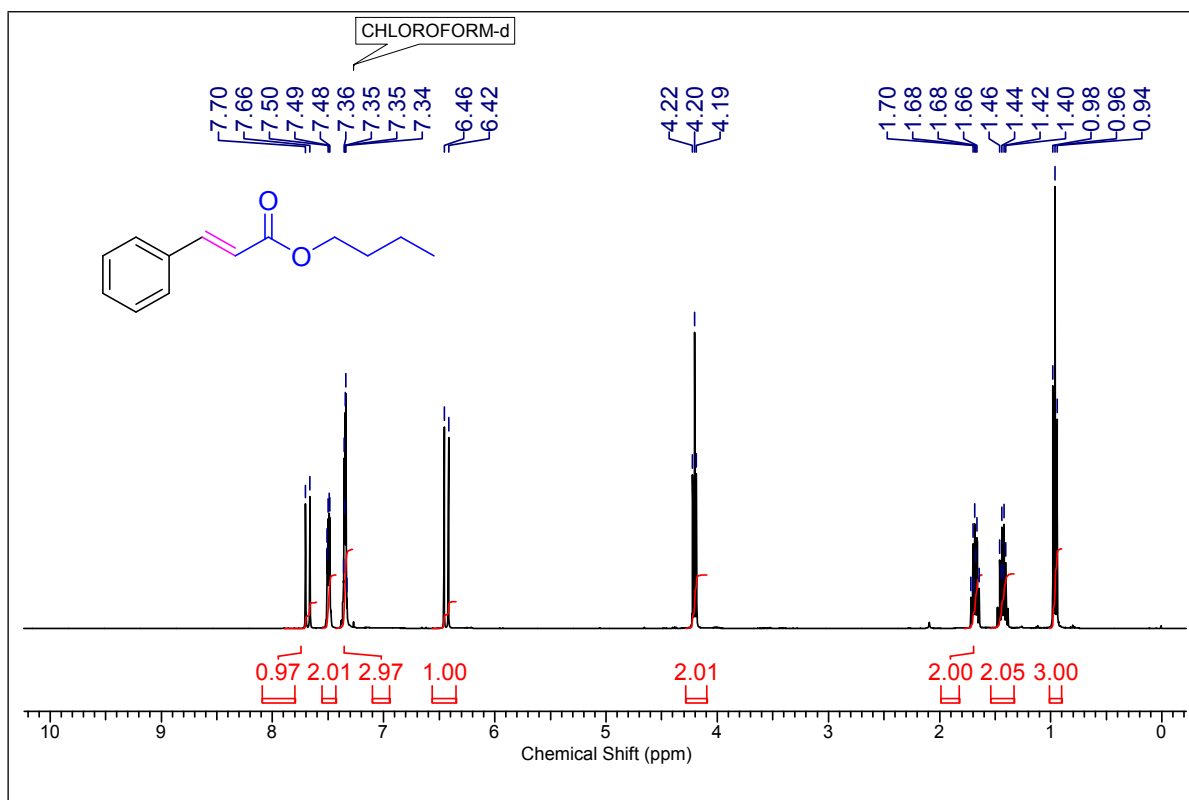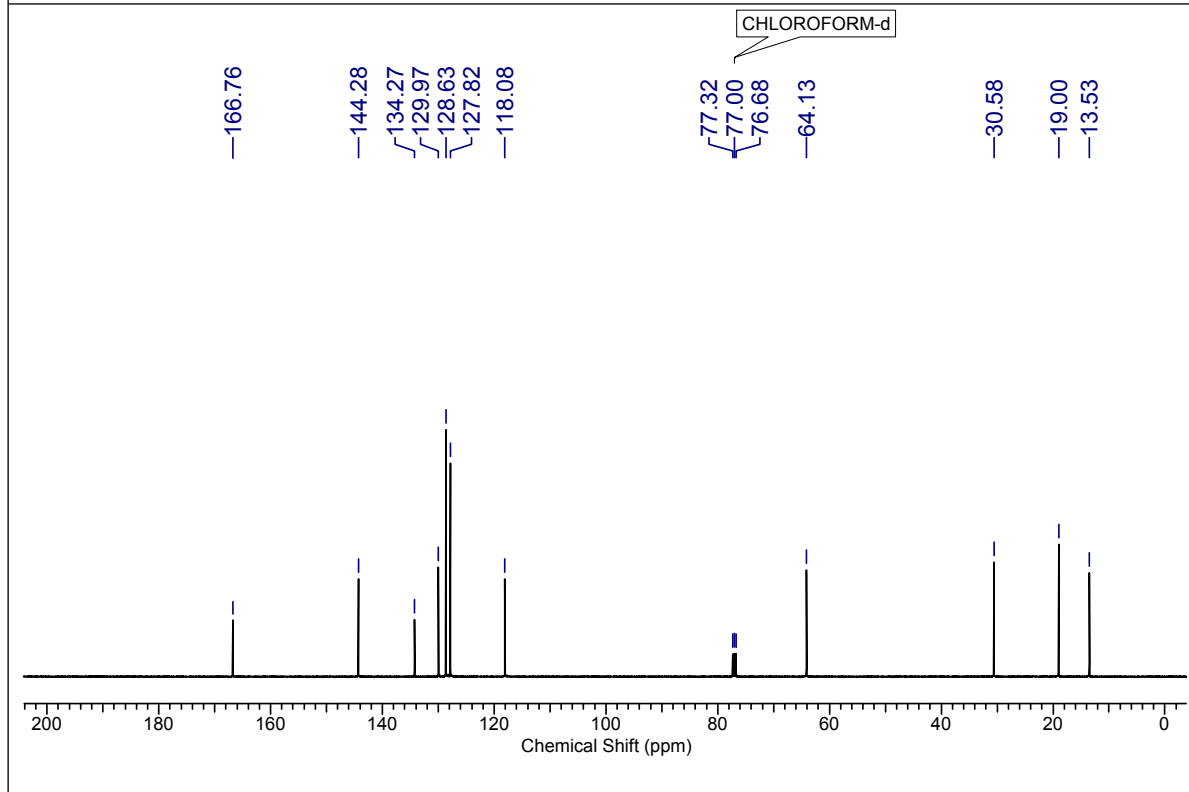

***(E)*- Butyl cinnamate(5d)**

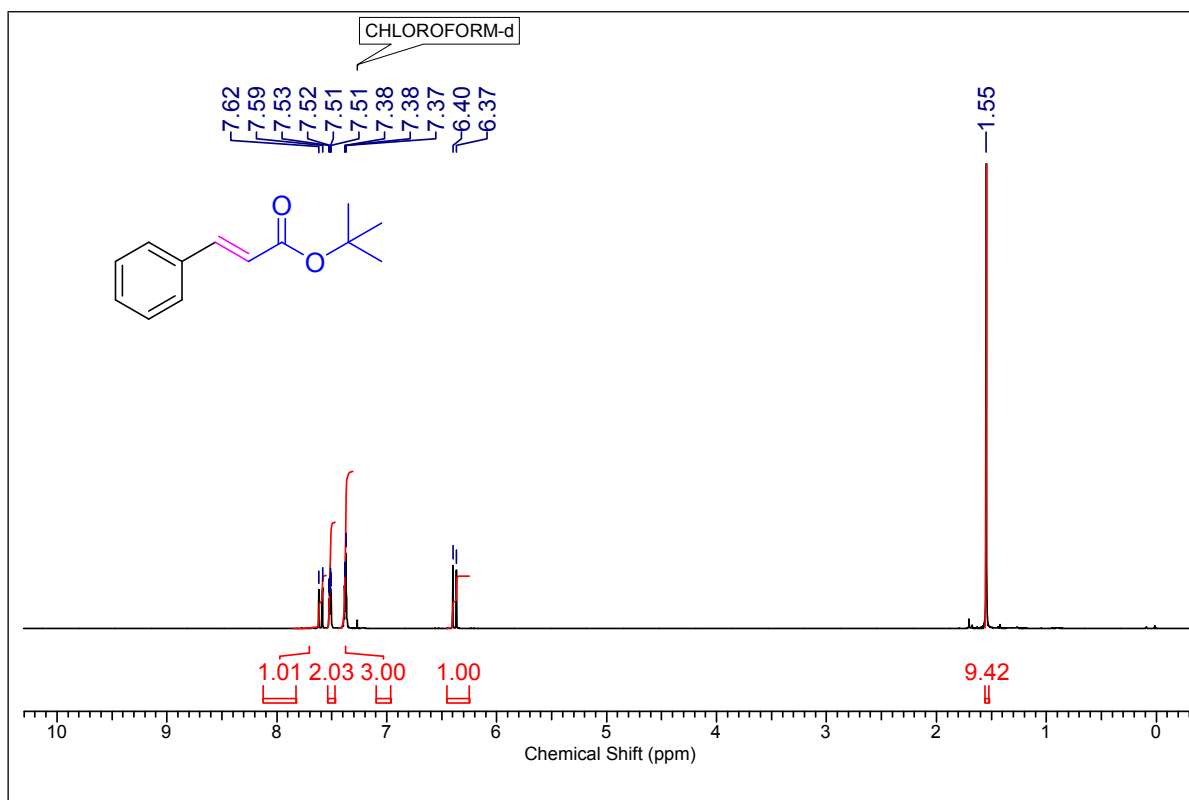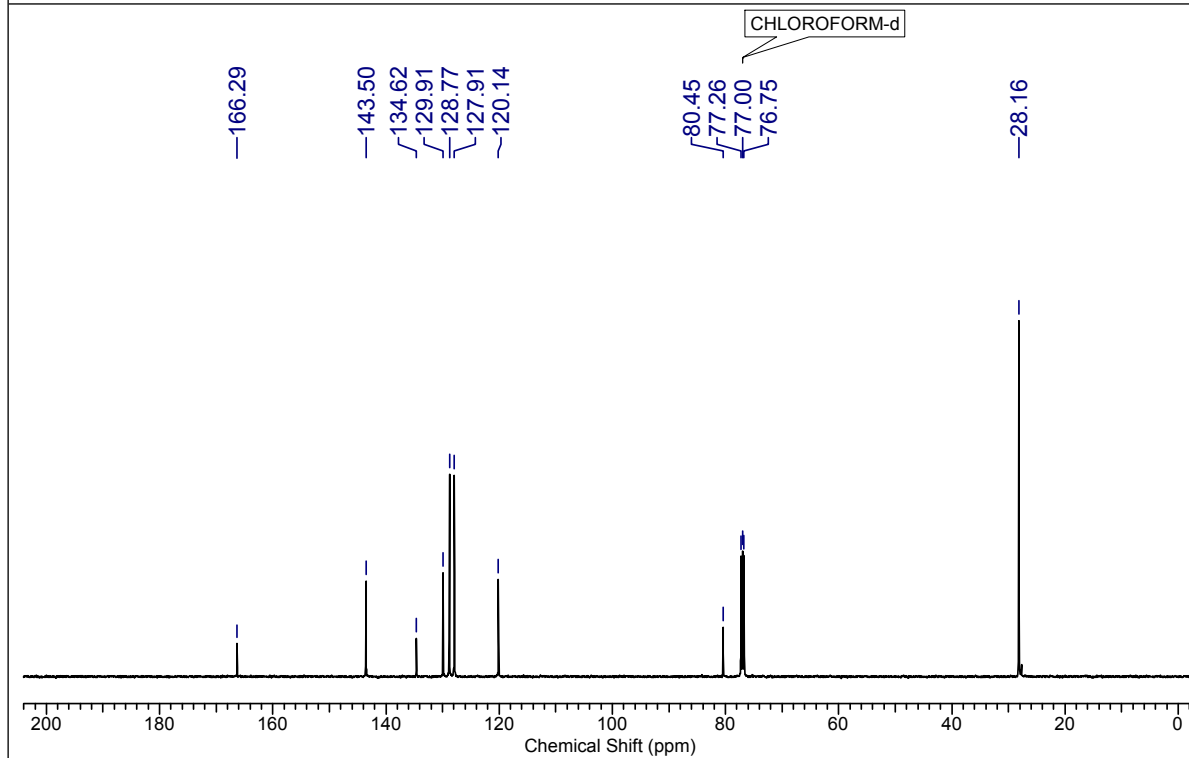

***(E)*-*tert*-butyl cinnamate(5e)**

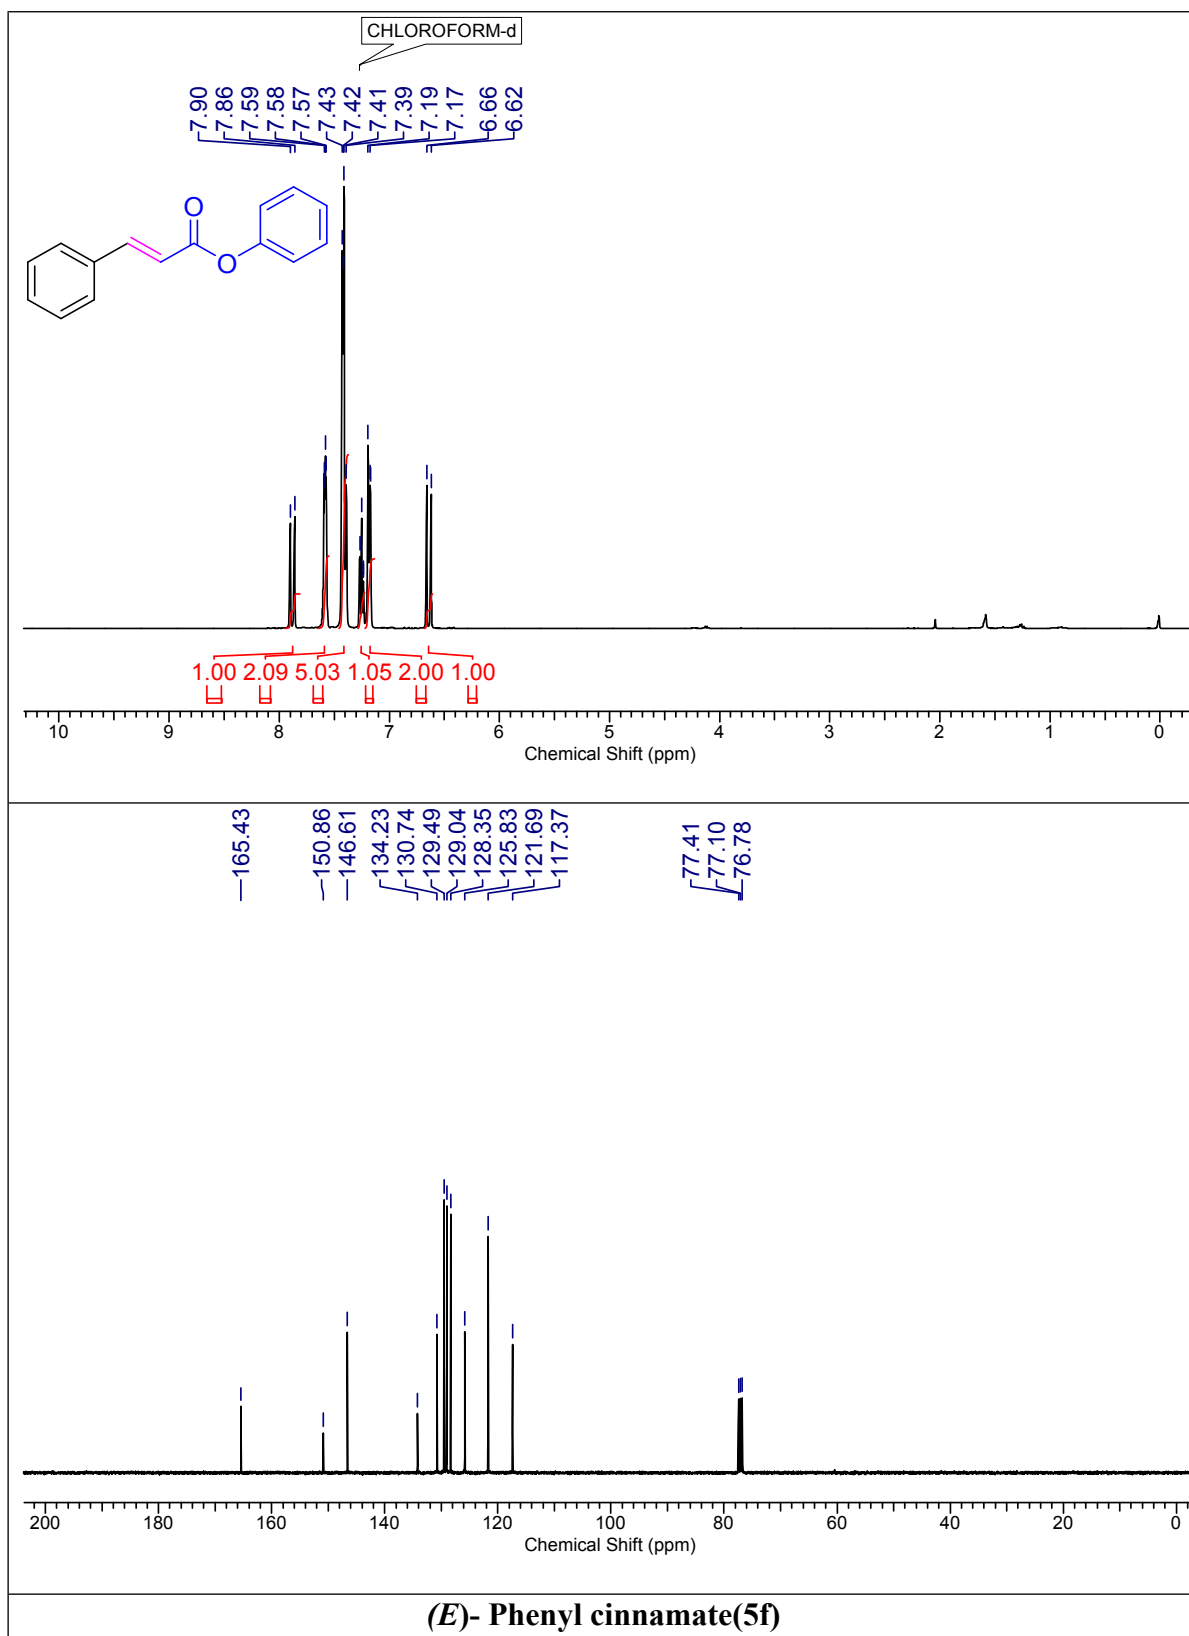

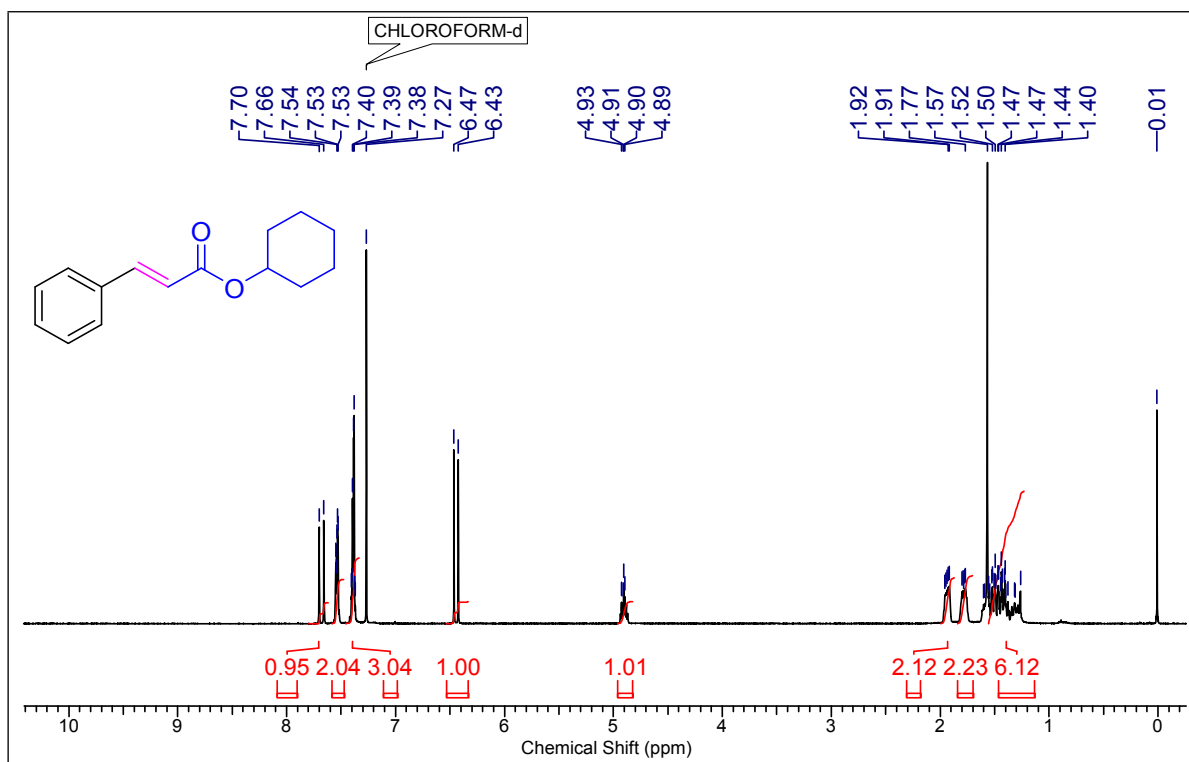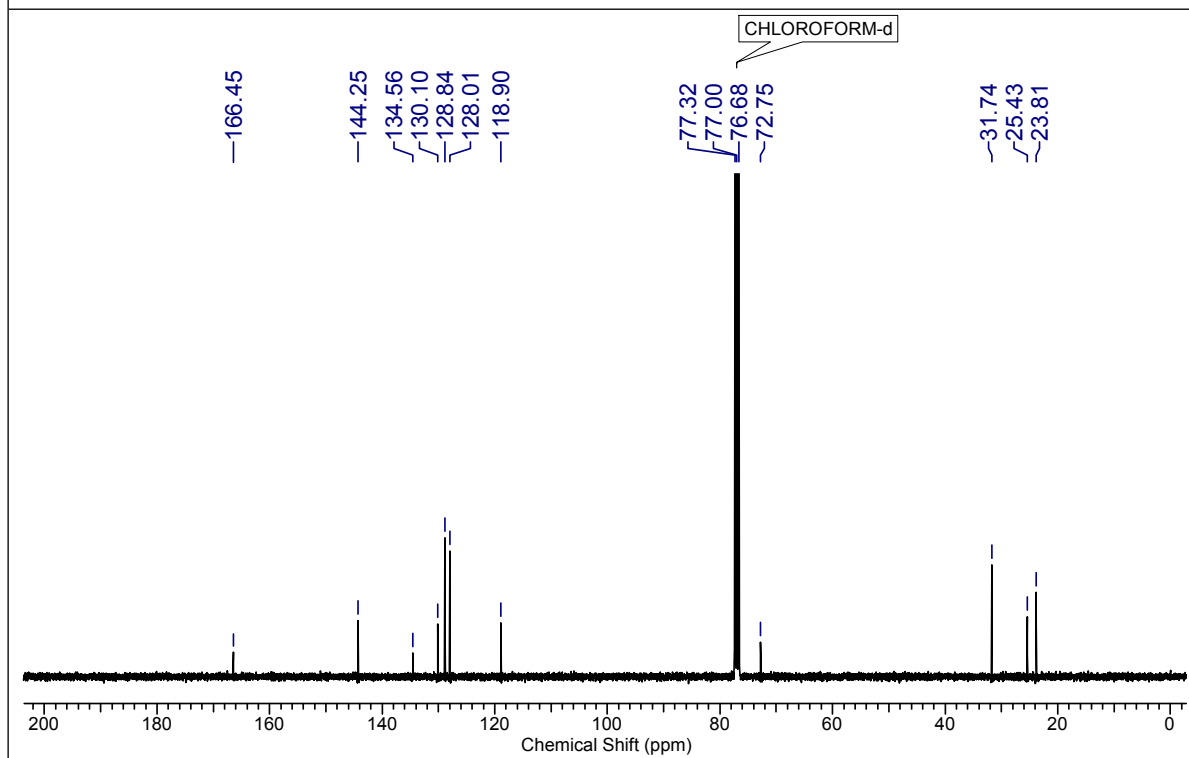

**(E)- Cyclohexyl cinnamate(5g)**

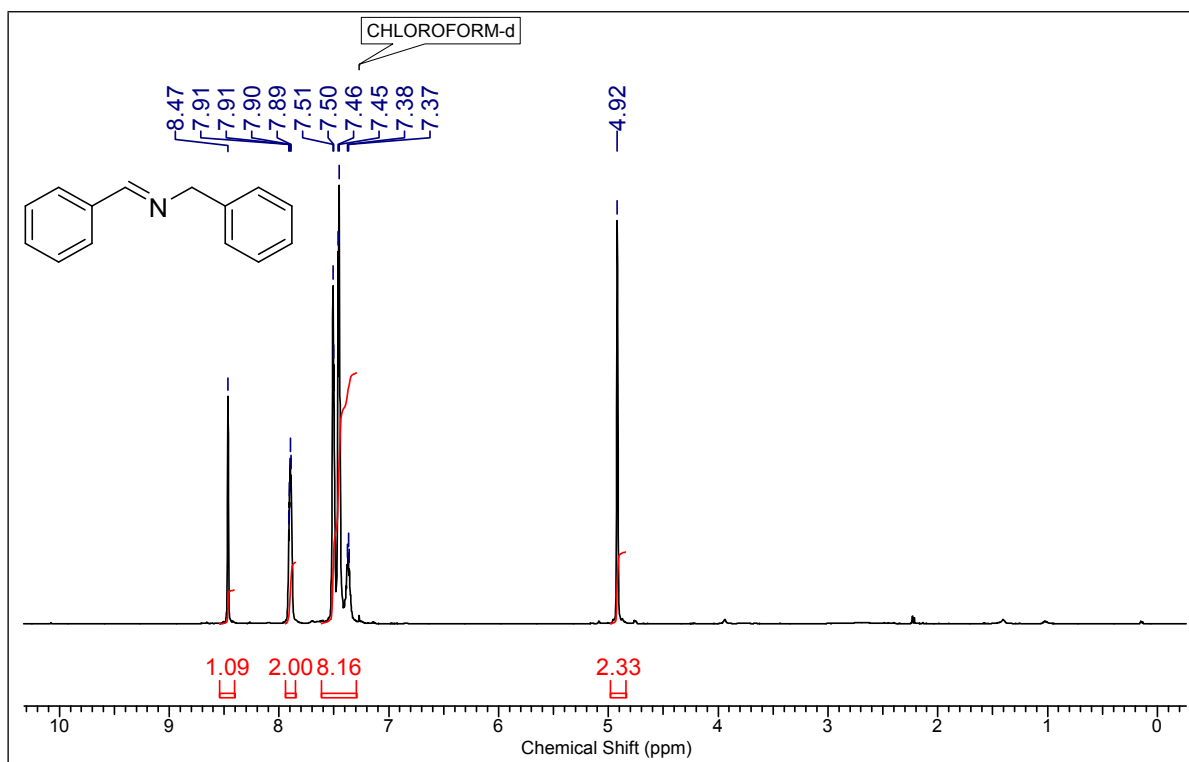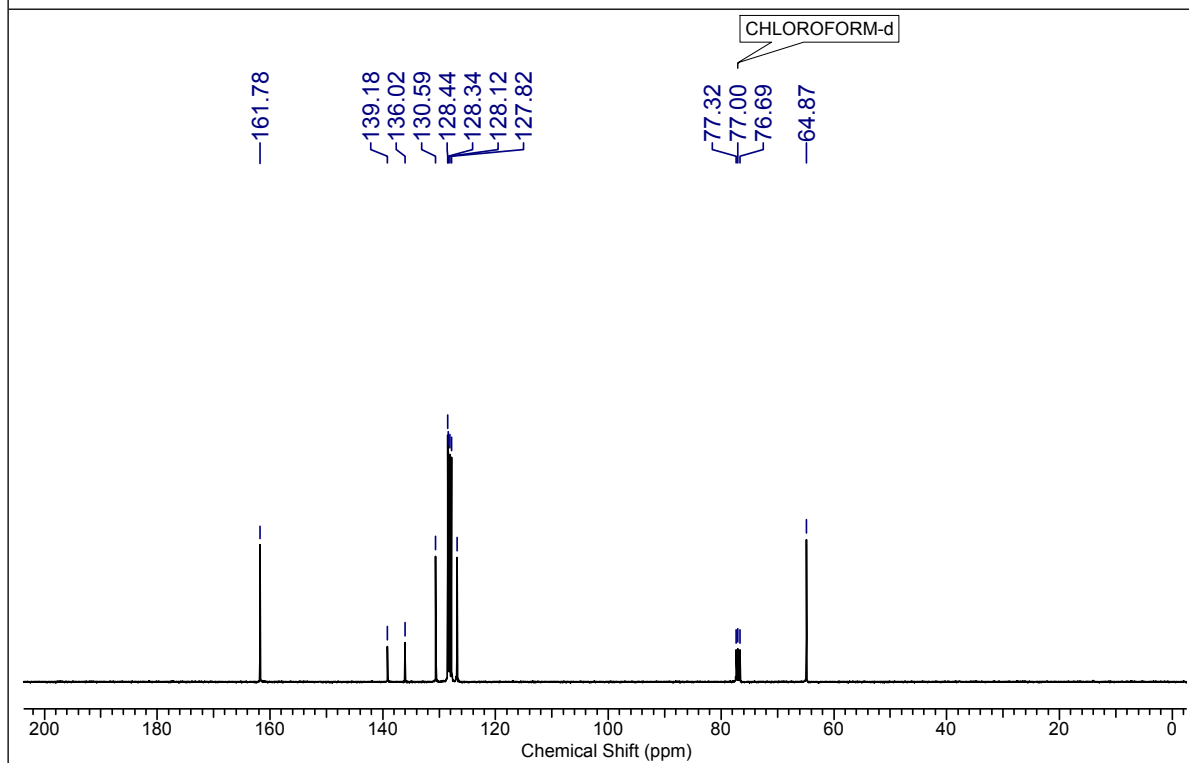

***(E)*-*N*-benzyl-1-phenylmethanimine (10)**



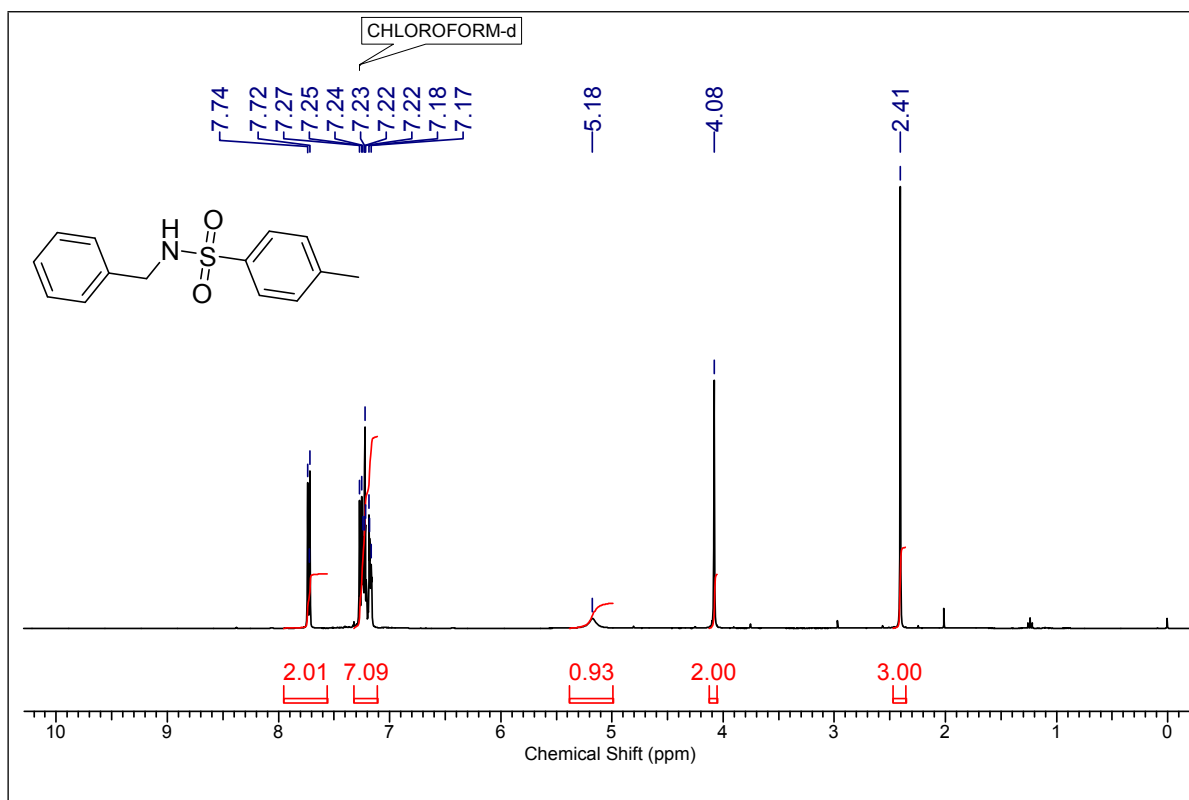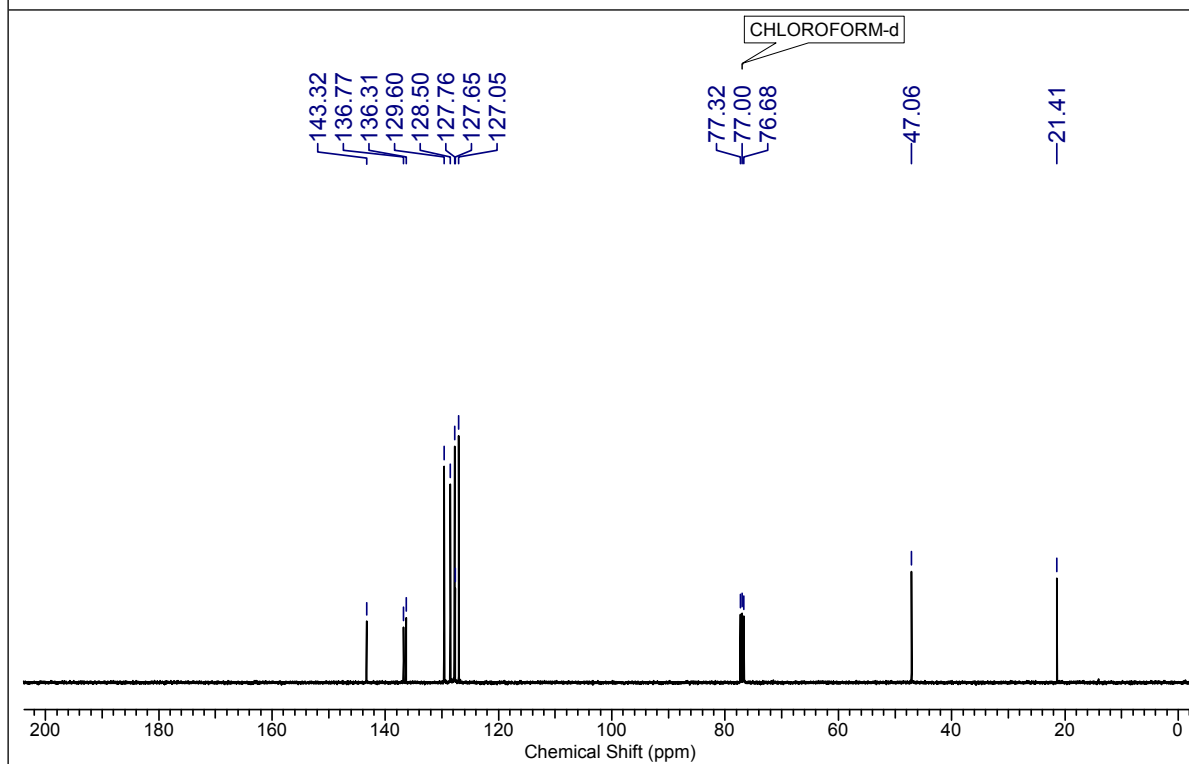

***N*-benzyl-4-methylbenzenesulfonamide (11)**

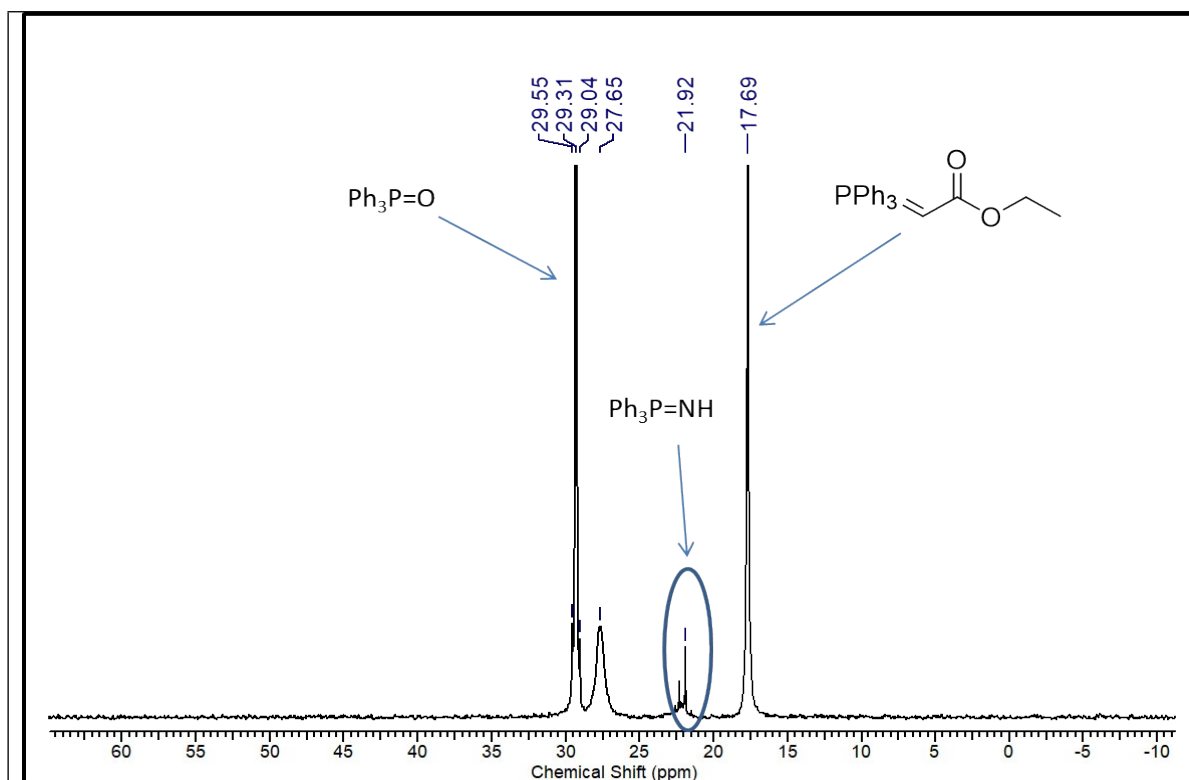

Fig. S1:  $^{31}\text{P}$  NMR Spectra of Reaction Mixture.
